# Supplementary material for: The multicomponent approach to N-methyl peptides: total synthesis of antibacterial (–)-viridic acid and analogues
Source: publisher site journal article supplement (doi:10.3762/bjoc.8.234), 2012-11-28
Supplement: Additional file 2 [file 1860-5397-8-234-S2.pdf]

301 Moved Permanently

# Moved Permanently

The document has moved here.
