# Supplementary material for: The multicomponent approach to N-methyl peptides: total synthesis of antibacterial (–)-viridic acid and analogues
Source: publisher site journal article supplement (doi:10.3762/bjoc.8.234), 2012-11-28
Supplement: Additional file 2 [file 1860-5397-8-234-S2.pdf]

**Supporting Information File 2**  
for  
**The multicomponent approach to *N*-methyl  
peptides: total synthesis of antibacterial  
(–)-viridic acid and analogues**

Ricardo A. W. Neves Filho<sup>1</sup>, Sebastian Stark<sup>1,2</sup>, Bernhard Westermann<sup>1,2</sup> and  
Ludger A. Wessjohann<sup>\*1,2</sup>

Address: <sup>1</sup>Department of Bioorganic Chemistry, Leibniz Institute of Plant  
Biochemistry, Weinberg 3, 06120 Halle (Saale), Germany, Tel: +49 345 5582  
1301, Fax: +49 345 5582 1309 (Address for correspondence) and <sup>2</sup>Martin-  
Luther-University Halle-Wittenberg, Institute of Organic Chemistry, Kurt-Mothes-  
Str. 2, 06120 Halle (Saale), Germany

Email: Ludger A. Wessjohann - wessjohann@ipb-halle.de.

\* Corresponding author:

**Figures of <sup>1</sup>H and <sup>13</sup>C NMR spectra**

Please note that spectra of *N*-alkyl-amides (peptoids) like Ugi products display double signal sets due to interconvertible isomers with *s-cis* and *s-trans*-amide bonds. Depending on the substitution pattern, solvent and temperature, the equilibrium between these forms is shifted and may lead to broadened or doubled peaks of varied intensity.

Tue Nov 8 11:06 2011

exp3 Proton

```
SAMPLE
date      Nov 8 2011
samplename WNF255
solvent   cdcl3
file      exp
ACQUISITION
instrum   m400
probe_    autoX
seqfil    s2pul
sfrq      399.918
tn        H1
at        2.561
np        32768
sv        6398.0
bs        4
tpwr      59
pw        5.5
d1        0.439
d2        0
tof       368.7
nt        40
ct        32
alock     n
gain      not used
FLAGS
il        n
in        n
dp        y
DEC. & VT
dn        C13
dfrq      100.568
homo      n
dpwr      45
dof       0
dm        nnn
dmm       c
dmf       17100
PROCESSING
lb        0.40
wtfile
proc      ft
fn        not used
DISPLAY
sp        -200.1
vp        4798.9
vs        162
sc        0
wc        225
hzmm      21.33
is        311.21
rf1       799.5
rfp       0
th        2.1
ins       9.000
xp        18.3
lp        -84.9
nm        ph
```

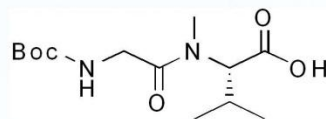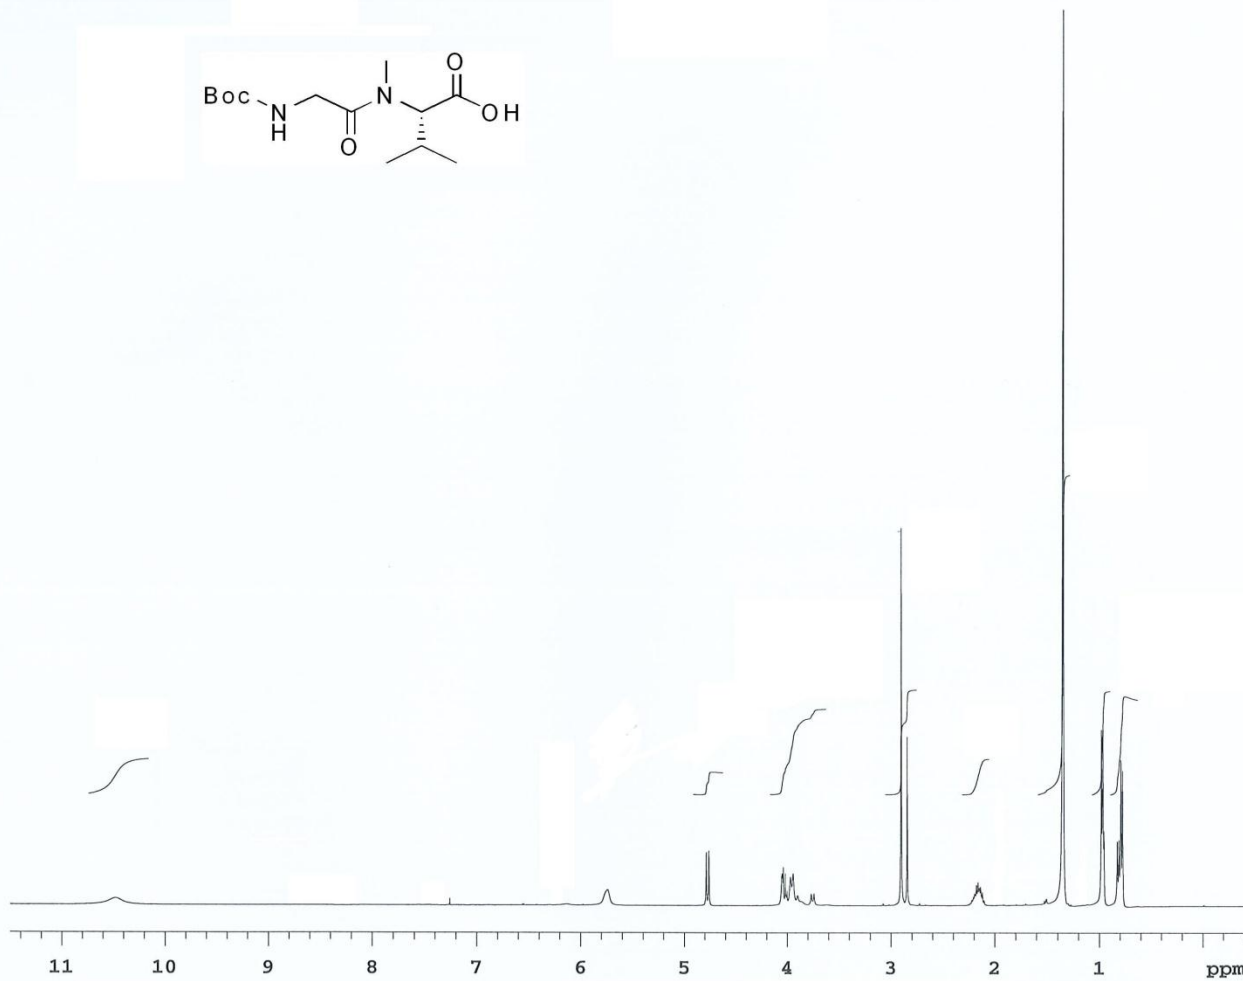

Figure S1:  $^1\text{H}$  NMR spectrum of compound 6.

Tue Nov 8 11:08 2011  
duration: 0h 6min

exp4 Carbon

```
SAMPLE
date Nov 8 2011
samplename WNF255
solvent cdcl3
file exp
ACQUISITION
instrum m400
probe_ autoX
seqfil s2pul
sfrq 100.569
tn c13
at 1.357
np 65536
sw 24154.6
bs 16
tpwr 59
pw 5.7
d1 2.143
d2 0
tof 1020.6
nt 2048
ct 96
alock n
gain not used
PLSG
il n
in n
dp y
DEC. & VT
dn H1
dfrq 399.917
homo n
dpwr 39
dof 0
dm yyy
dmm w
dmf 9300
pp 14.8
PROCESSING
lb 0.80
wtfile
proc ft
fn 65536
wemp procplot
DISPLAY
sp -914.0
wp 20453.4
vs 162
sc 0
wc 225
hzmm 90.90
rf1 9276.9
rfp 7743.0
th 68.3
rp 149.1
lp -238.1
nm cdc ph
```

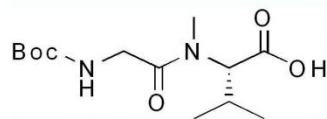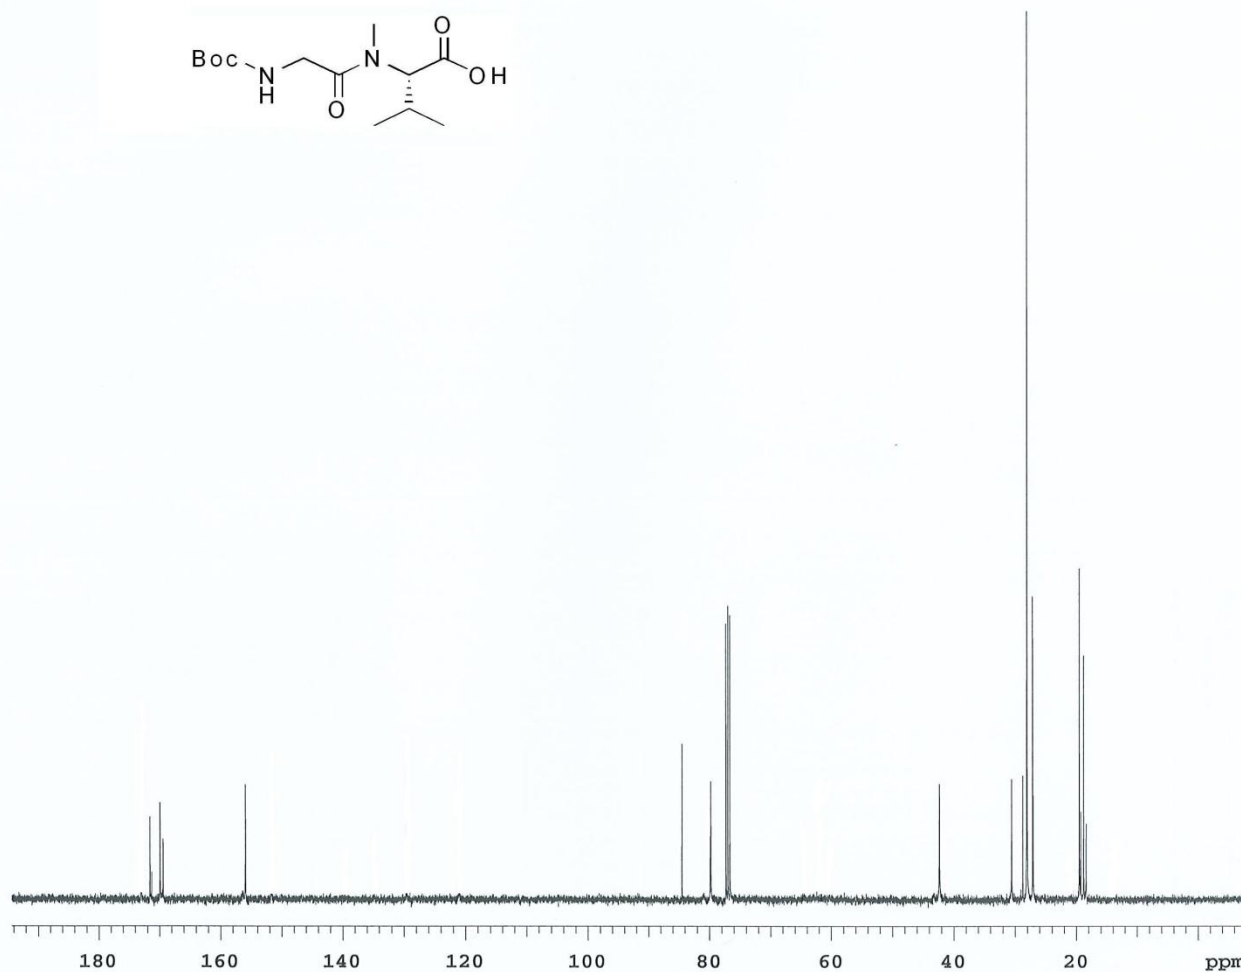

Figure S2:  $^{13}\text{C}$  NMR spectrum of compound **6**.

Fri Nov 11 14:51 2011

exp1 Proton

SAMPLE

date Nov 11 2011  
samplename WNF258  
solvent cdcl3  
file exp

ACQUISITION

instrum m400  
probe\_ autoX  
seqfil s2pul  
sfrq 399.918  
tn H1  
at 2.561  
np 32768  
sw 6398.0  
bs 4  
tpwr 59  
pw 5.5  
d1 0.439  
d2 0  
tof 368.7  
nt 40  
ct 12  
alock n  
gain not used

FLAGS

il n  
in n  
dp y

DEC. & VT

dn C13  
dfrq 100.568  
homo n  
dpwr 45  
dof 0  
dm nnn  
dmm c  
dmf 17100

PROCESSING

lb 0.40  
wtfile  
proc ft  
fn not used

DISPLAY

sp -0.1  
wp 4798.9  
vs 162  
sc 0  
wc 225  
hzmm 21.33  
is 444.11  
rf1 799.5  
rfp 0  
th 2.9  
ins 3.000  
rp 16.3  
lp -94.1  
nm ph

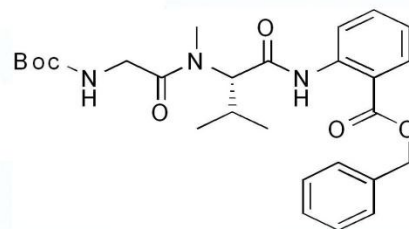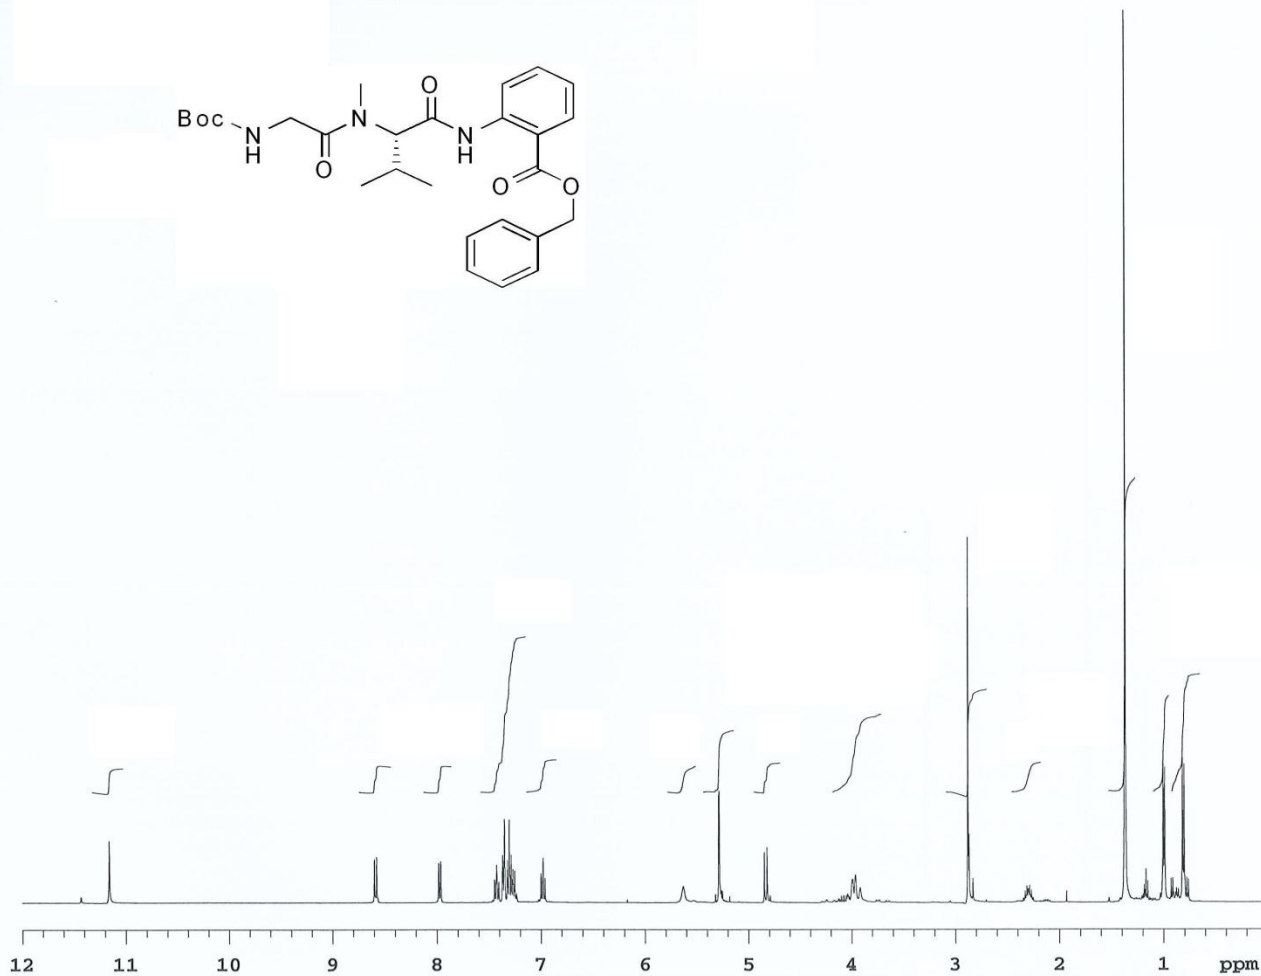

Figure S3:  $^1\text{H}$  NMR spectrum of compound 7.

Fri Nov 11 14:52 2011  
duration: 0h 7min

exp2 Carbon

```
SAMPLE
date      Nov 11 2011
samplename WNF258
solvent   cdcl3
file      exp
ACQUISITION
instrum   M400
probe     autoX
seqfil    s2pul
sfrq      100.569
tn         C13
at         1.357
np         65536
sw         24154.6
bs         16
tpwr       59
pw         5.7
d1         2.143
d2         0
tof        1020.6
nt         2048
ct         112
alock     n
gain      not used
FLAGS
il         n
in         n
dp         y
DEC. & VR
dn         H1
dfrq      399.917
homo      n
dpwr       39
dof        0
dm         YYY
dmm        w
dmf        9300
pp         14.8
PROCESSING
lb         0.80
wtfile
proc       ft
fn         65536
wexp      procplot
DISPLAY
sp         -1547.4
wp         24153.9
vs         122
sc         0
wc         225
hzmh      107.35
rf1        9291.2
rfp        7743.0
th         5.2
xp         -155.1
lp         -253.2
nm cdc ph
```

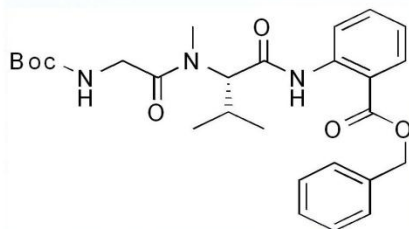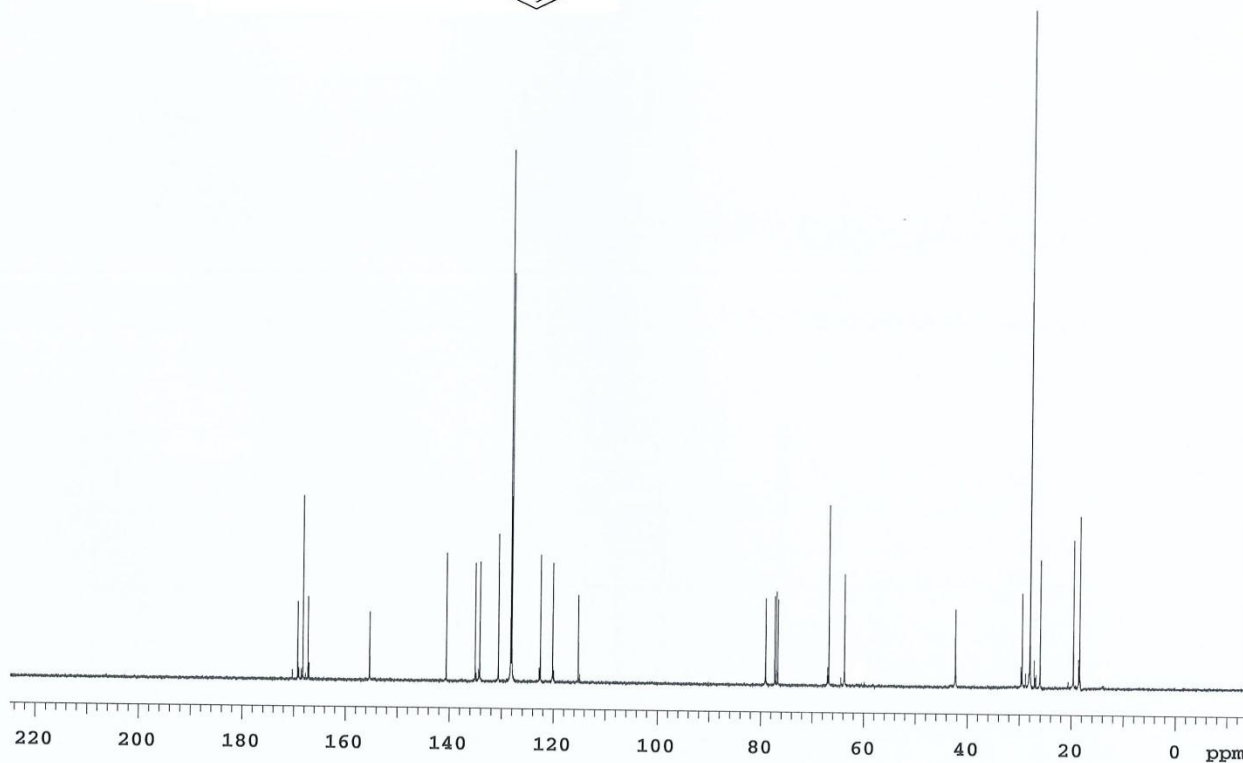

Figure S4:  $^{13}\text{C}$  NMR spectrum of compound 7.

WNF259/CDC13/1H

Mon Nov 14 15:32 2011

exp1 Proton

```
SAMPLE
date Nov 14 2011
samplename WNF259
solvent cdcl3
file exp
ACQUISITION
instrum m400
probe_ autoX
seqfil s2pul
sfrq 399.918
tn H1
at 2.561
np 32768
sv 6398.0
hs 4
tpwr 59
pw 5.5
d1 0.439
d2 0
tof 368.7
nt 40
ct 8
alock n
gain not used
FLAGS
il n
in n
dp y
DEC. & VT
dn C13
dfrq 100.568
homo n
dpwr 45
dof 0
dm nnn
dmm c
dmf 17100
PROCESSING
lb 0.40
wtfile
proc Ft
fn not used
DISPLAY
sp -135.2
vp 5059.7
vs 162
sc 0
wc 225
hzmm 22.49
is 742.76
rf1 799.5
rfp 0
th 5.8
ins 2.000
sp 28.8
lp -104.3
nm ph
```

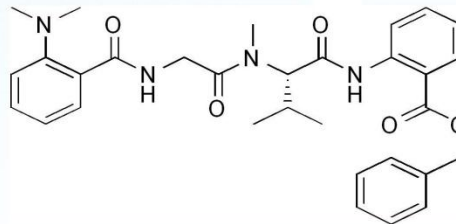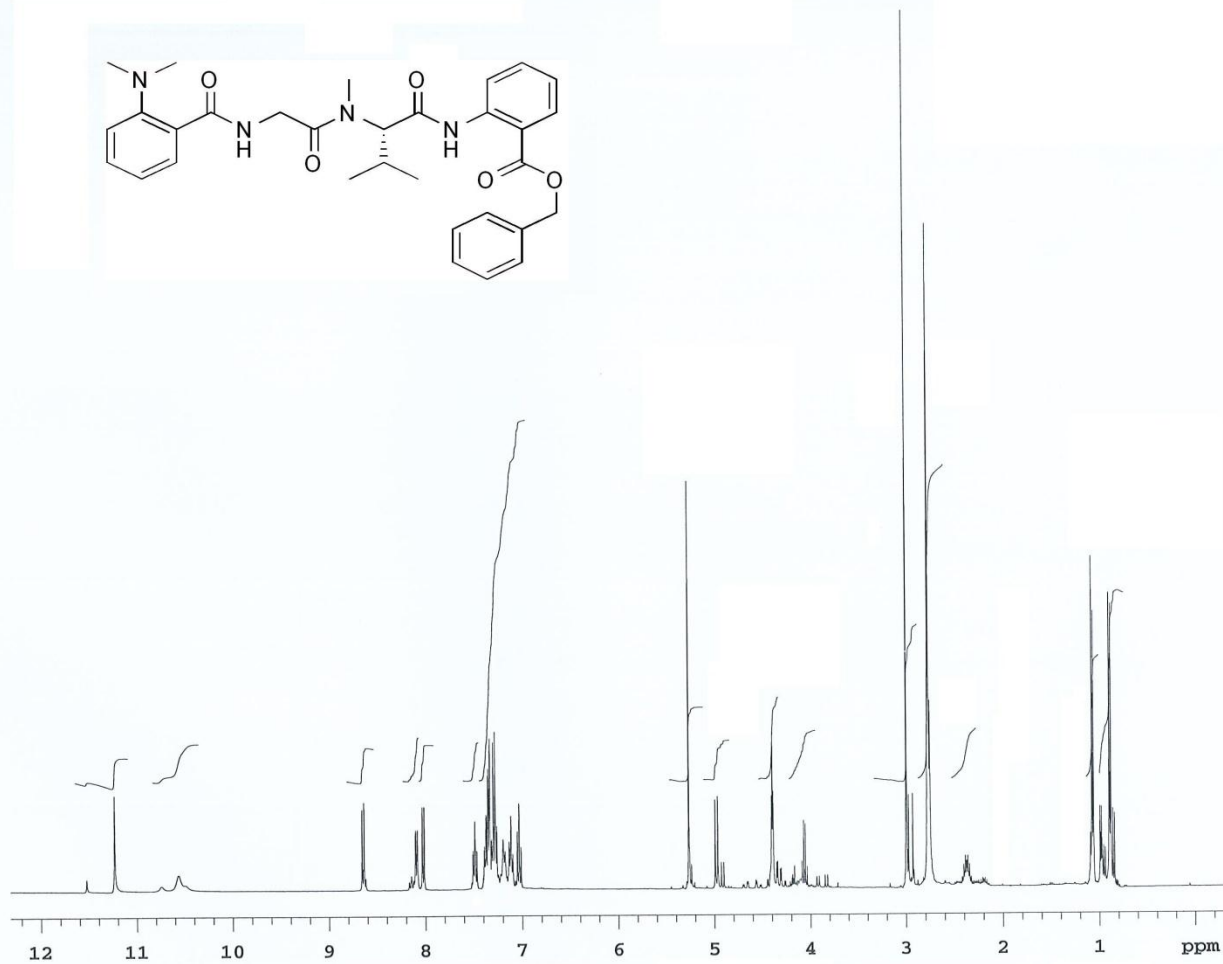

Figure S5:  $^1\text{H}$  NMR spectrum of compound 2.

WNF259/CDCl3/1H  
Mon Nov 14 15:33 2011  
duration: 2h 56min

exp2 Carbon

```
SAMPLE
date Nov 14 2011
samplename WNF259
solvent cdcl3
file exp
ACQUISITION
instrum m400
probe autoX
seqfil s2pul
sfrq 100.569
tn C13
at 1.357
np 65536
sw 24154.6
bs 16
tpwr 59
pw 5.7
d1 2.143
d2 0
tof 1020.6
nt 2048
ct 1840
alock n
gain not used
FLAGS
il n
in n
dp Y
DEC. & VT
dn H1
dfrq 399.917
homo n
dpwr 39
dof 0
dm YYY
dmm w
dmf 9300
pp 14.8
PROCESSING
lb 0.80
wtfile
proc ft
fn 65536
wexp procplot
DISPLAY
sp -1538.1
wp 24153.9
vs 114
sc 0
wc 225
hzmm 107.35
rf1 9281.8
rfp 7743.0
th 9.9
fp -143.5
lp -248.1
nm cdc ph
```

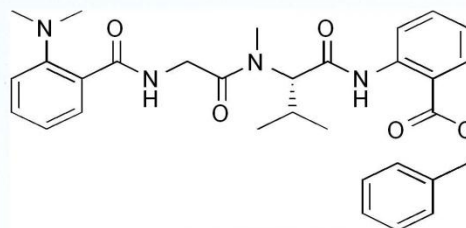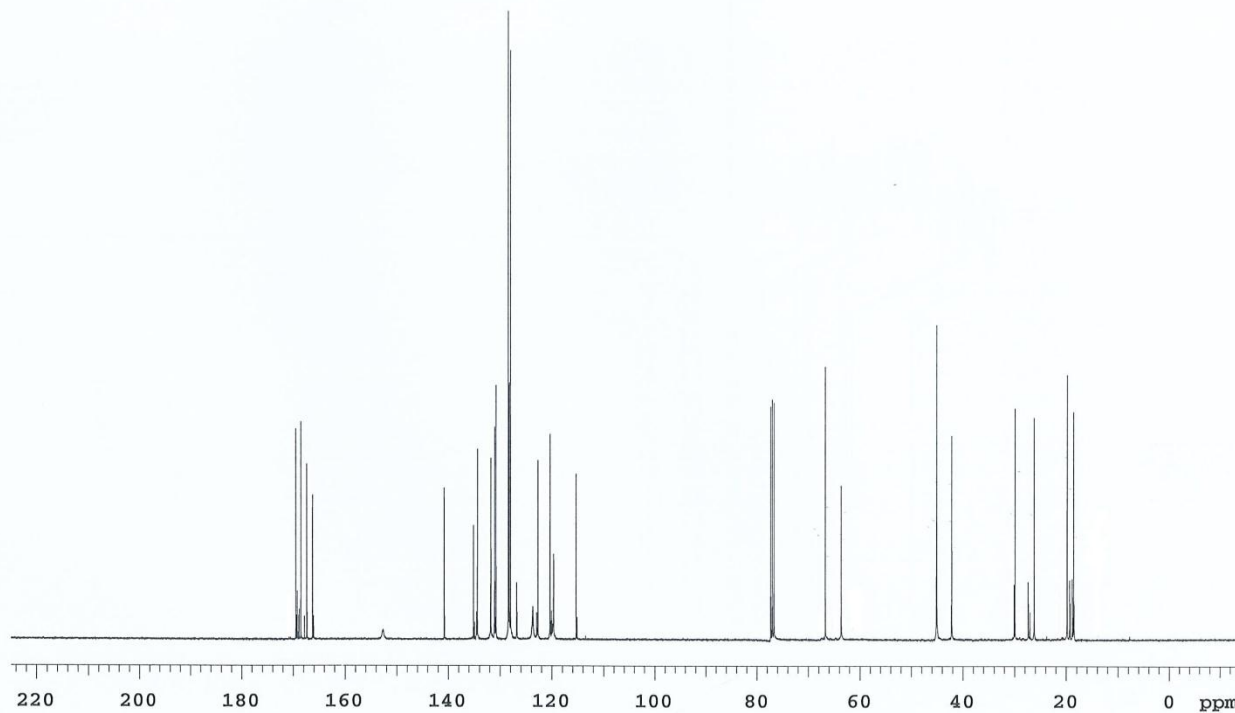

Figure S6:  $^{13}\text{C}$  NMR spectrum of compound 2.

(-)-Viridic acid

Thu Nov 17 09:20 2011

exp3 Proton

```
SAMPLE
date Nov 17 2011
samplename WNF261
solvent dmsd
file exp
ACQUISITION
instrum m400
probe_ autoX
seqfil s2pul
sfrq 399.920
tn H1
at 2.561
np 32768
sw 6398.0
bs 4
tpwr 59
pw 5.5
d1 0.439
d2 0
tof 368.7
nt 40
ct 40
alock n
gain not used
FLAGS
il n
in n
dp y
DEC. & VT
dn C13
dfrq 100.569
homo n
dpwr 45
dof 0
dm mnn
dmm c
dmf 17100
PROCESSING
lb 0.40
wtfile
proc ft
fn not used
DISPLAY
sp -141.6
vp 4320.9
vs 162
fc 0
vc 225
hnm 19.20
is 1251.46
rf1 1792.0
rfp 1000.2
th 2.1
ins 3.000
rp 16.8
lp -93.3
nm ph
```

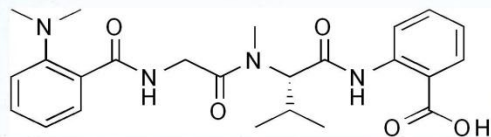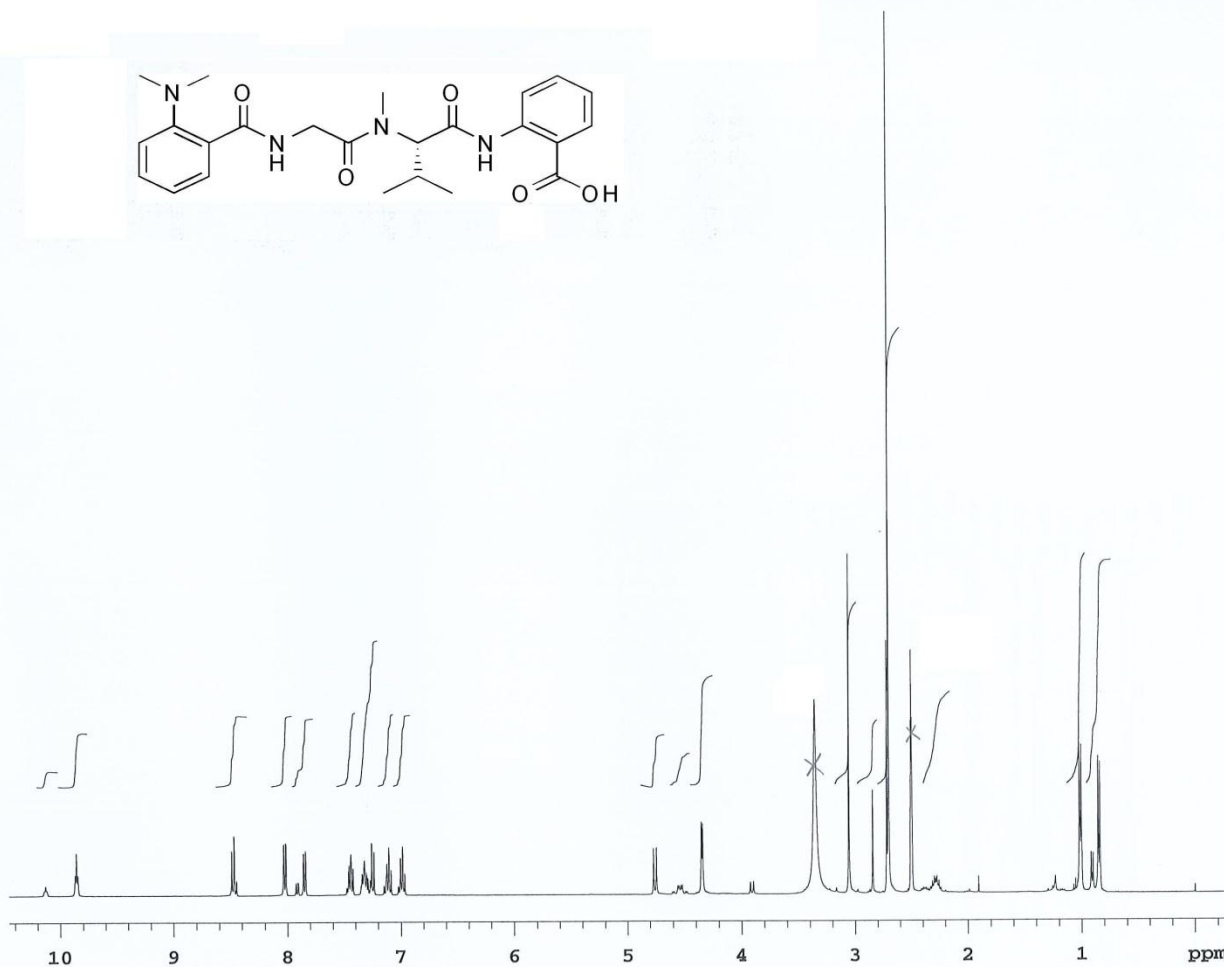

Figure S7:  $^1\text{H}$  NMR spectrum of viridic acid (1).



(-)-Viridic acid

Thu Nov 17 09:23 2011  
duration: 5h 3min

exp4 Carbon

SAMPLE

date Nov 17 2011  
samplename WNF261  
solvent dmsd  
file exp

ACQUISITION

instrum m400  
probe\_ autoX  
seqfil s2pul  
sfrq 100.570  
tn C13  
at 1.357  
np 65536  
sw 24154.6  
bs 16  
tpwr 59  
pw 5.7  
d1 2.143  
d2 0  
tof 1020.6  
nt 5000  
ct 4816  
alock n  
gain not used

FLAGS

il n  
in n  
dp y

DEC. & VT

dn H1  
dfrq 399.919  
homo n  
dpwr 39  
dof 0  
dm yyy  
dmm w  
dmf 9300  
pp 14.8

PROCESSING

lb 0.80  
wtfile  
proc ft  
fn 65536

wexp procplot

DISPLAY  
sp -1561.8  
wp 24153.9  
vs 1176  
sc 0  
wc 225  
hzmm 107.35  
xf1 5534.6  
xrp 3972.1  
th 4.2  
xp -161.0  
lp -210.0  
nm cdc ph

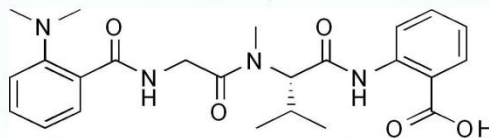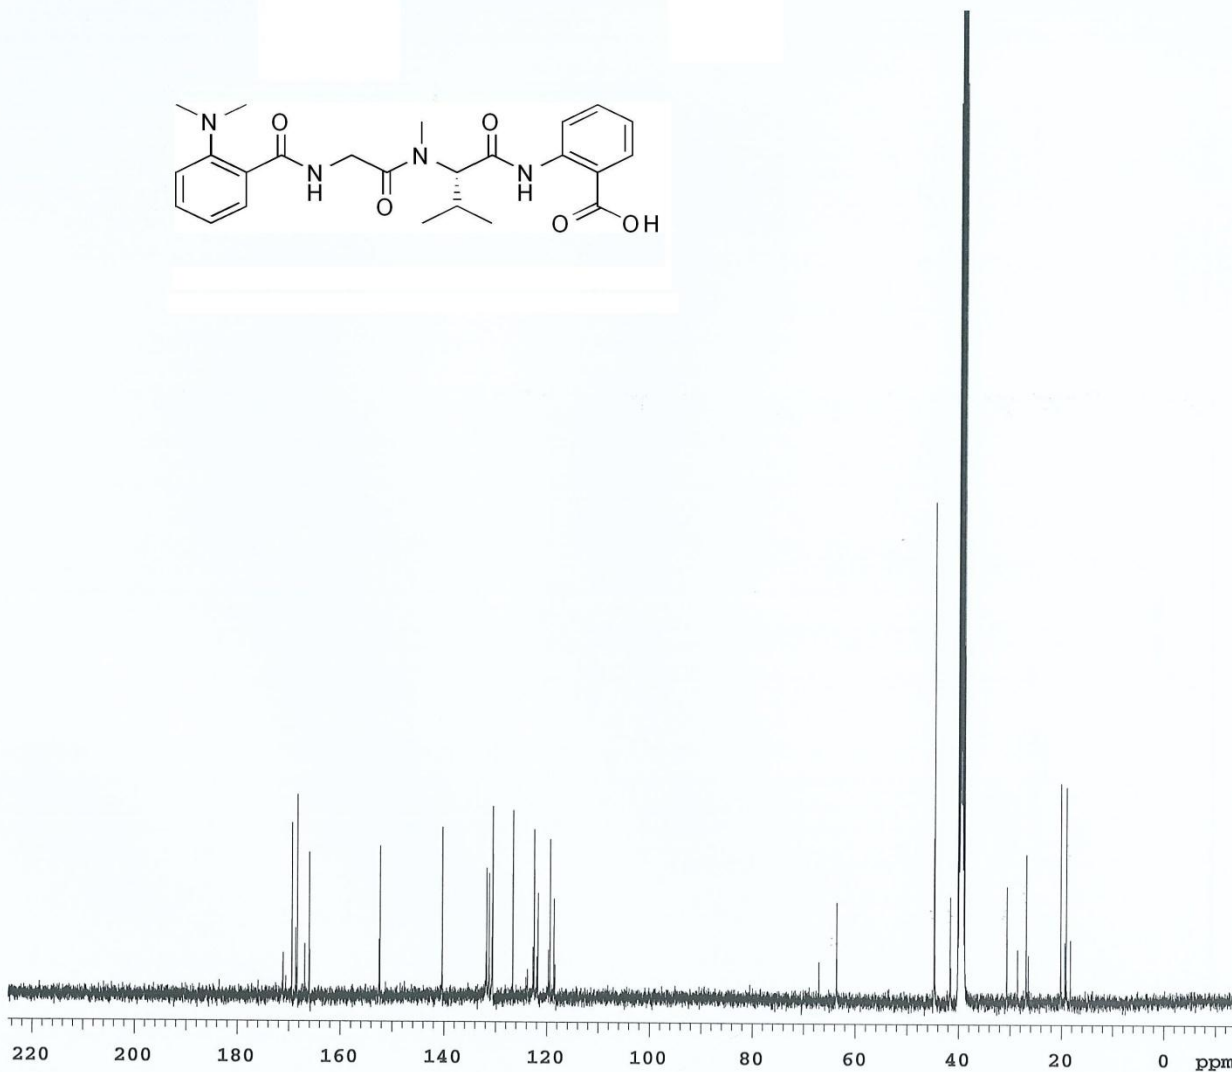

Figure S8:  $^{13}\text{C}$  NMR spectrum of viridic acid (1).

Mon Jan 9 19:33 2012

exp1 Proton

SAMPLE  
date Jan 9 2012  
samplename WN183  
solvent cdcl3  
file exp

ACQUISITION  
instrum m400  
probe\_ autoX  
seqfil s2pul  
sfrq 399.918  
tn H1  
at 2.561  
np 32768  
sw 6398.0  
hs 4  
tpwr 59  
pw 5.5  
d1 0.439  
d2 0  
tof 368.7  
nt 40  
ct 12  
alock n  
gain not used

FLAGS  
il n  
in n  
dp y

DEC. & VT

dn C13  
dfrq 100.568  
homo n  
dpwr 45  
dof 0  
dm nnn  
dmm c  
dmf 17100

PROCESSING  
lb 0.40  
wtfile  
proc ft  
fn not used

DISPLAY

sp -200.1  
wp 4598.9  
vs 162  
sc 0  
wc 225  
hzmm 20.44  
is 525.24  
rfl 799.5  
rfp 0  
th 2.1  
ins 6.000  
rp 4.5  
lp -109.7  
nm ph

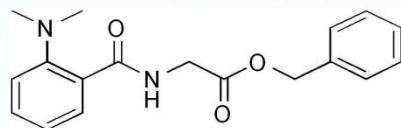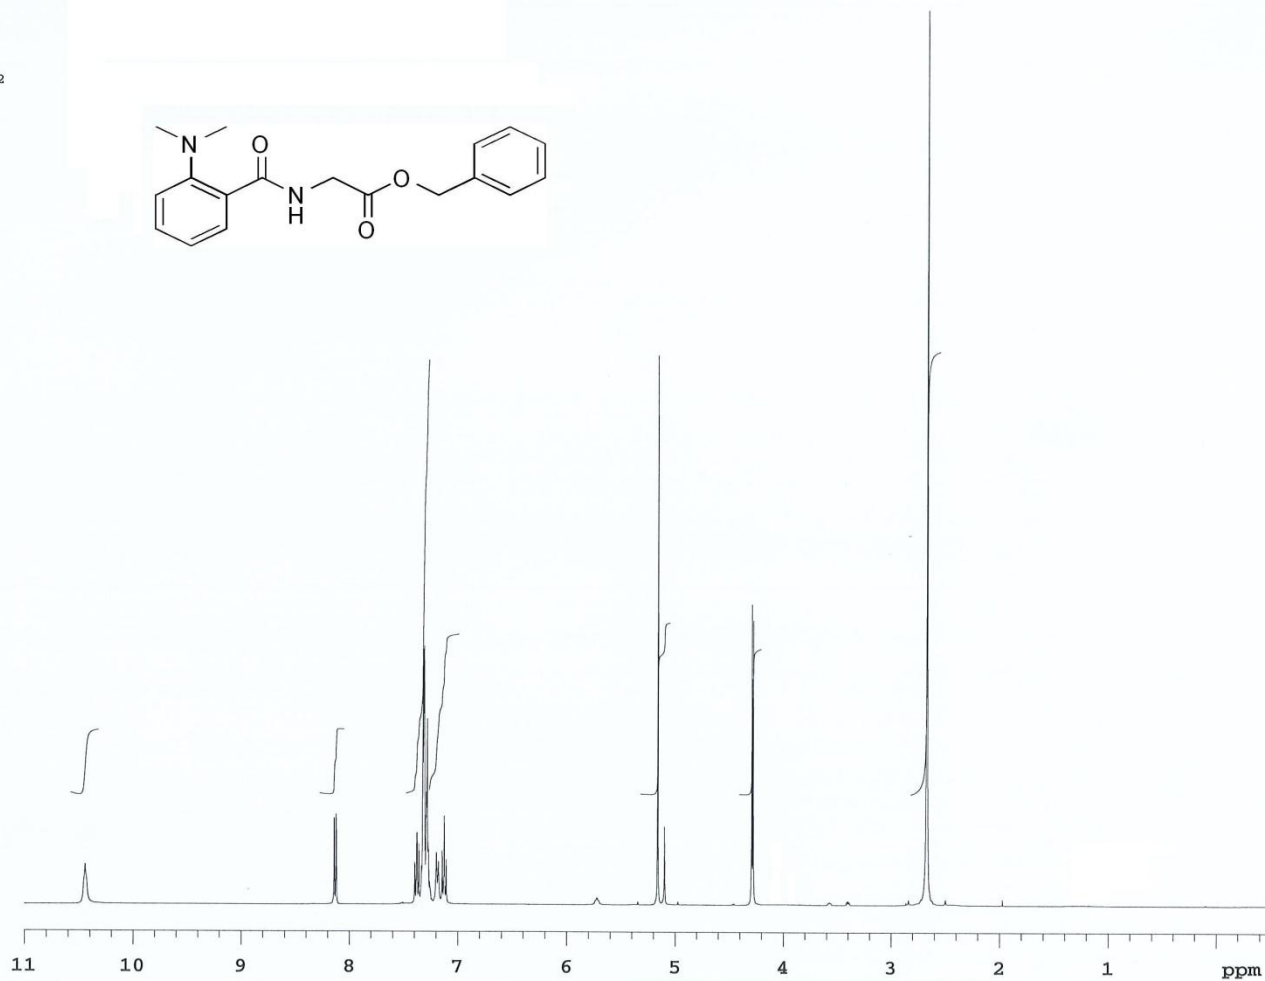

Figure S9:  $^1\text{H}$  NMR spectrum of compound 10.

WNF183/CDC13/13C

Mon Jan 9 19:34 2012  
duration: 0h 2min

exp2 Carbon

```
SAMPLE
date Jan 9 2012
samplename WNF183
solvent cdc13
file exp

ACQUISITION
instrum m400
probe_ autoX
seqfil s2pul
sfrq 100.569
tn c13
at 1.357
np 65536
sw 24154.6
bs 16
tpwr 59
pw 5.7
d1 2.143
d2 0
tof 1020.6
nt 2048
ct 32
alock n
gain not used

FLAGS
il n
in n
dp y

DEC. & VT
dn H1
dfrq 399.917
homo n
dpwr 39
dof 0
dm YYY
dmm w
dmf 9300
pp 14.8

PROCESSING
lb 0.80
wtfile
proc ft
fn 65536

wexp procp
DISPLAY
sp -1554.6
wp 24153.9
vs 160
sc 0
wc 225
hmm 107.35
rfl 9298.4
rfp 7743.0
th 68.3
rp -163.0
lp -261.9
nm cdc ph
```

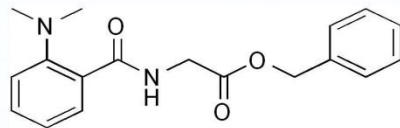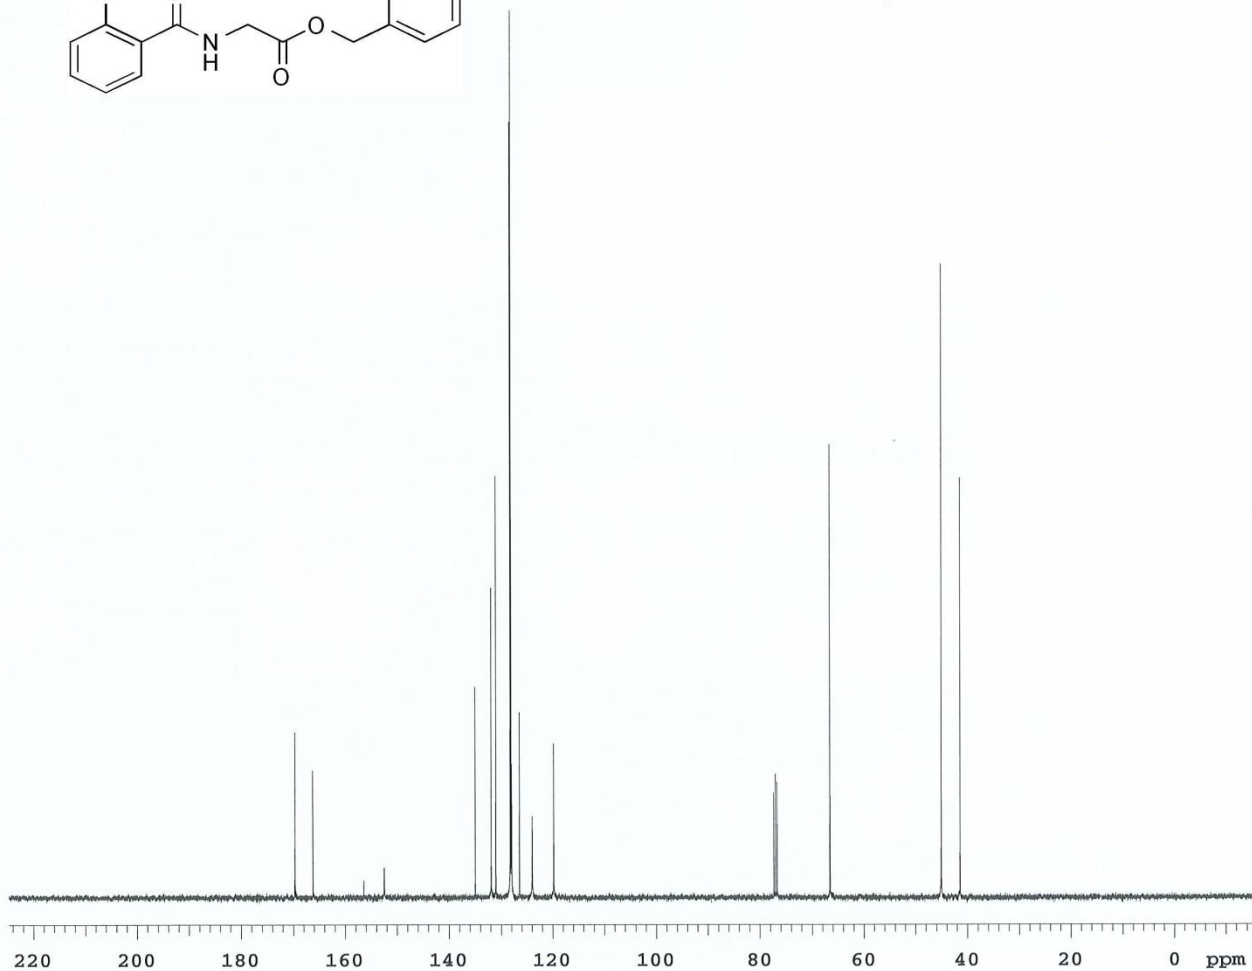

Figure S10:  $^{13}\text{C}$  NMR spectrum of compound 10.

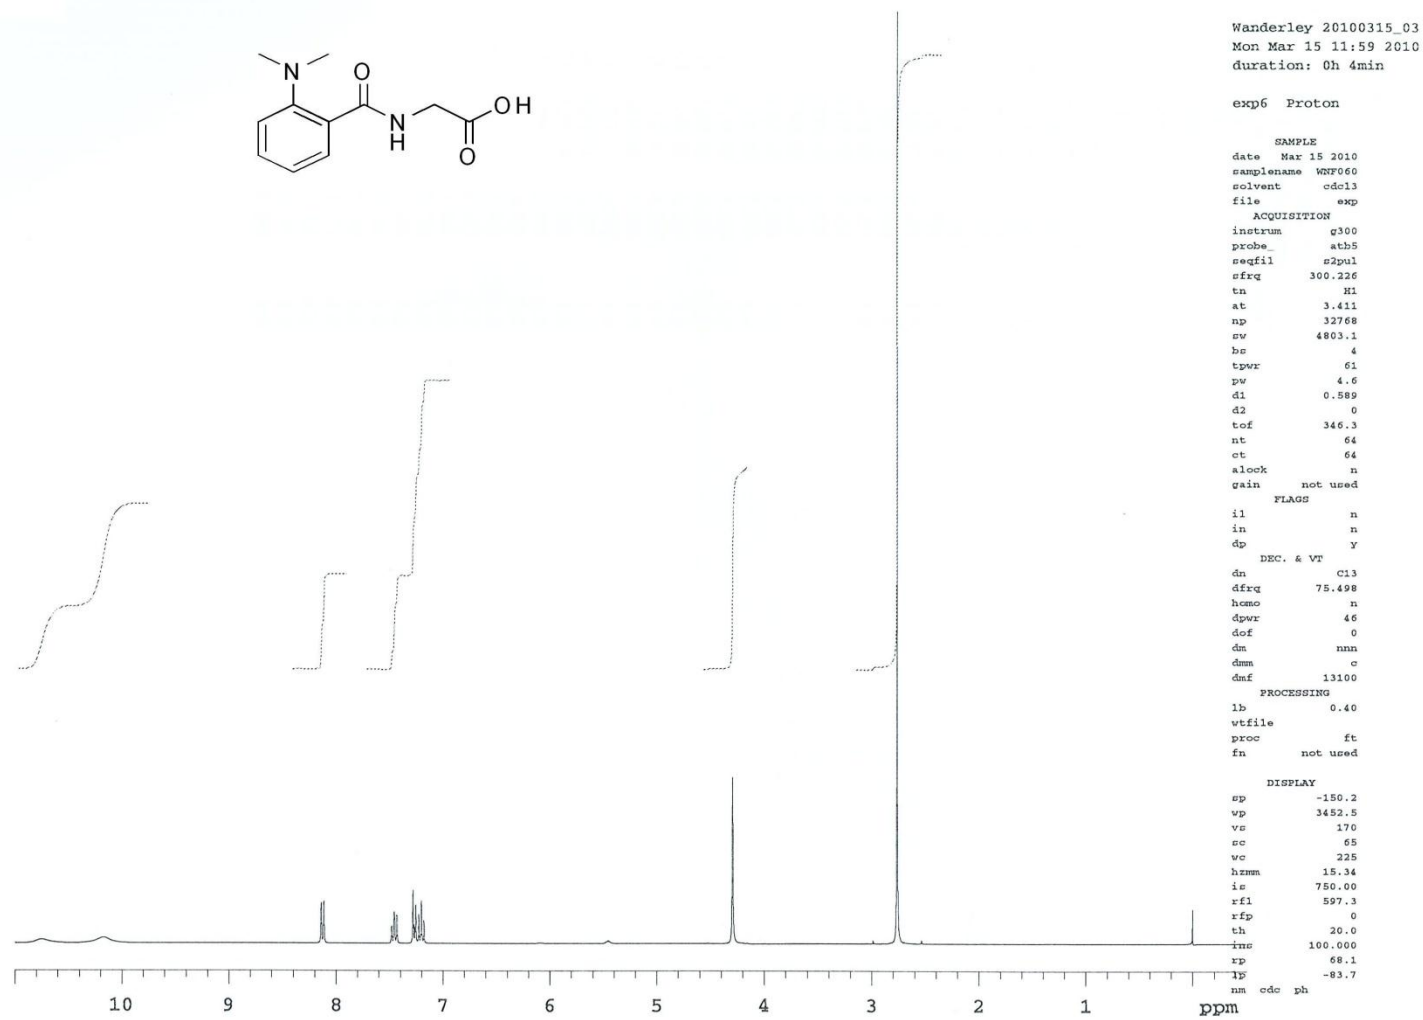

Figure S11:  $^1\text{H}$  NMR spectrum of compound 3.

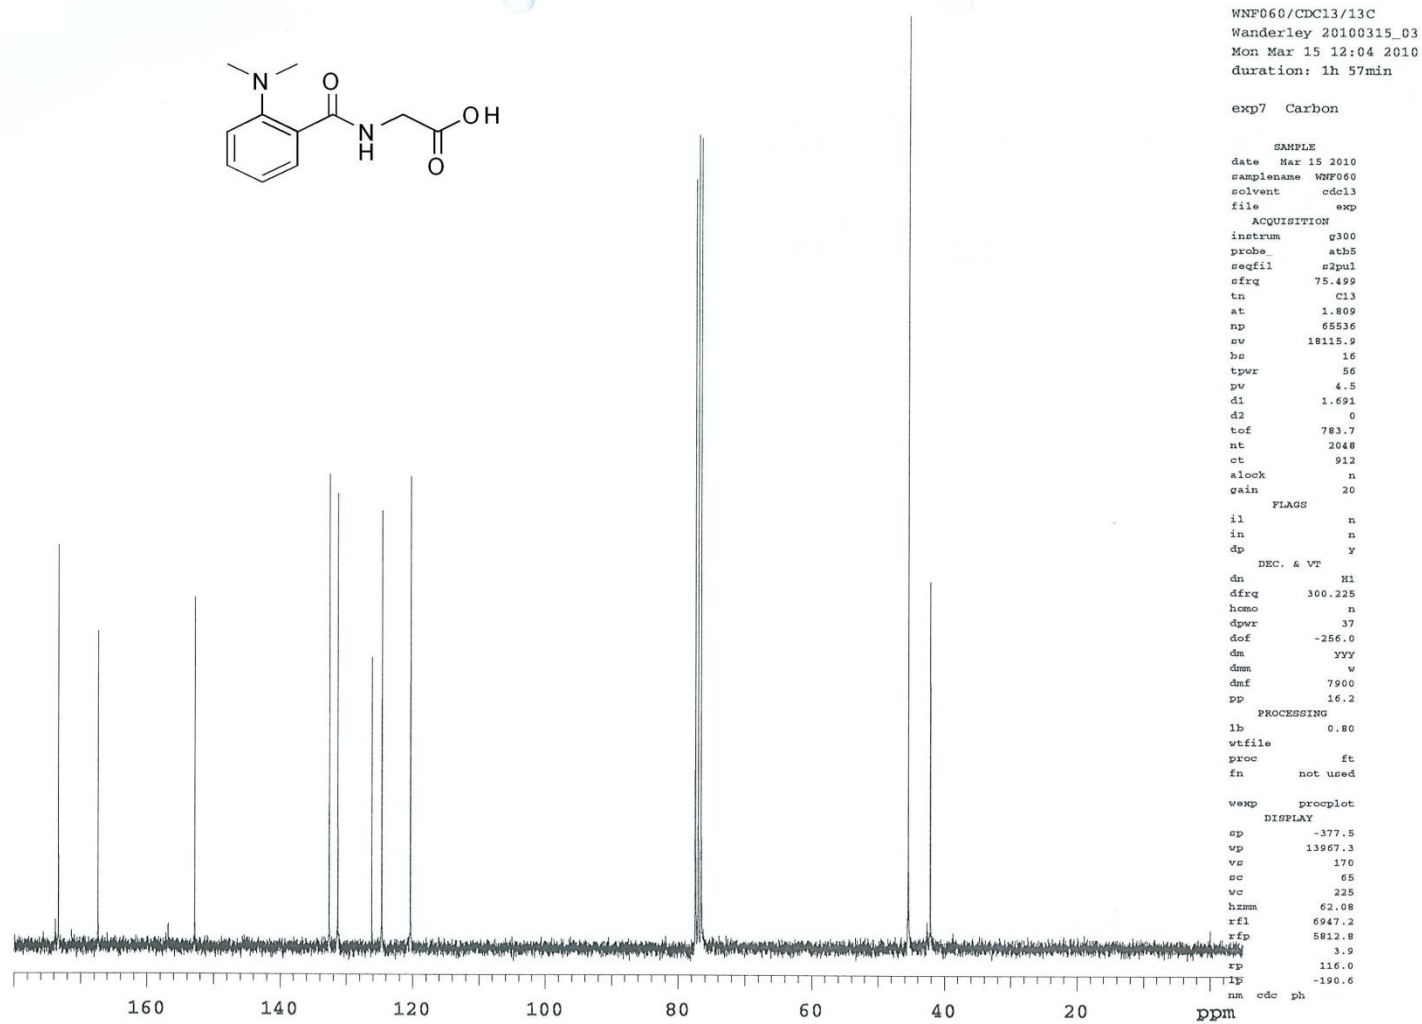

STA633/CDC13/1H  
Stark 20120530

Wed May 30 08:15 2012  
duration: 0h 2min

expl Proton

```
SAMPLE
date      May 30 2012
samplename STA633
solvent   cdcl3
file      exp
ACQUISITION
instrum   m400
probe_    autoX
seqfil    s2pul
sfrq      399.918
tn         H1
at         2.561
np         32768
sw         6398.0
bs         4
tpwr       59
pw         5.5
d1         0.439
d2         0
tof        368.7
nt         40
ct         40
alock     n
gain      not used
          FLAGS
il         n
in         n
dp         y
DEC. & VT
dn         C13
dfrq      100.568
homo       n
dpwr       45
dof        0
dm         mmn
dmm        c
dmf        17100
PROCESSING
lb         0.40
wtfile
proc       ft
fn         not used
DISPLAY
sp         -200.3
vp         3999.1
vs         170
sc         0
vc         225
hzmm       17.77
is         750.00
rf1        788.0
rfp        0
th         20.0
ins        100.000
rp         39.7
lp         -113.1
nm cdc ph
```

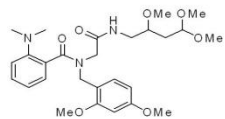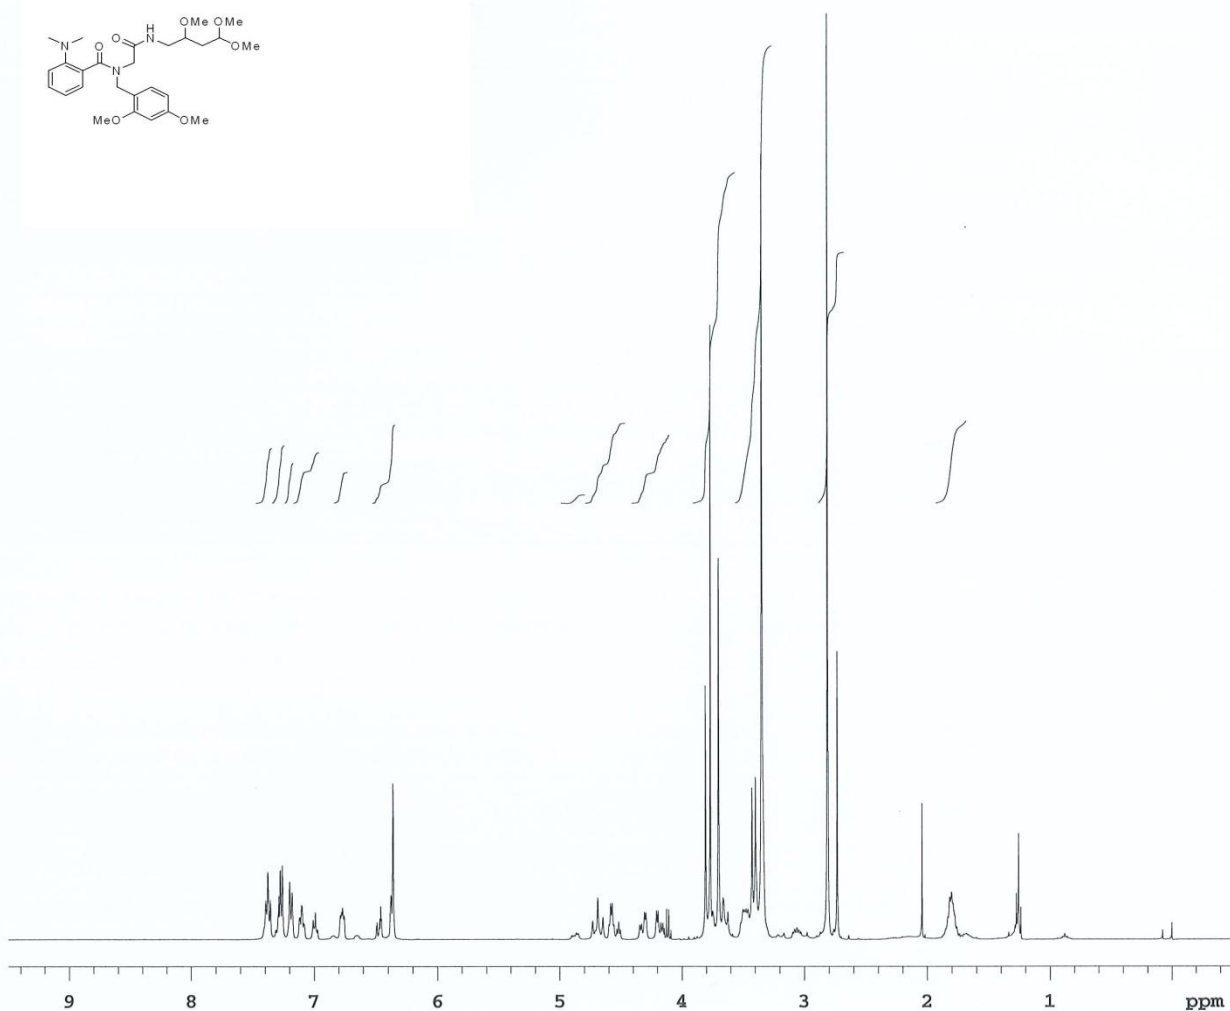

Figure S13: <sup>1</sup>H NMR spectrum of compound 11.

STA633/CDCl3/13C  
Stark 20120530

Wed May 30 08:17 2012  
duration: 2h 46min

exp2 Carbon

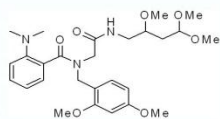

```
SAMPLE
date May 30 2012
samplename STA633
solvent cdcl3
file exp
ACQUISITION
instrum m400
probe_ autoX
seqfil s2pul
sfrq 100.569
tn C13
at 1.357
np 65536
sw 24154.6
bs 16
tpwr 59
pw 5.7
d1 2.143
d2 0
tof 1020.6
nt 2048
ct 1680
alock n
gain not used
FLAGS
il n
in n
dp y
DEC. & VT
dn H1
dfrq 399.917
homo n
dpr 39
dof 0
dm YYY
dmm w
dmf 9300
pp 14.8
PROCESSING
lb 0.80
wtfile
proc ft
fn 65536
wekp procp1ot
DISPLAY
sp -593.4
wp 20113.6
vs 170
sc 0
wc 225
hzmm 89.39
rfl 9270.3
rfp 7743.0
th 68.3
rp 165.9
lp -270.9
nm cdc ph
```

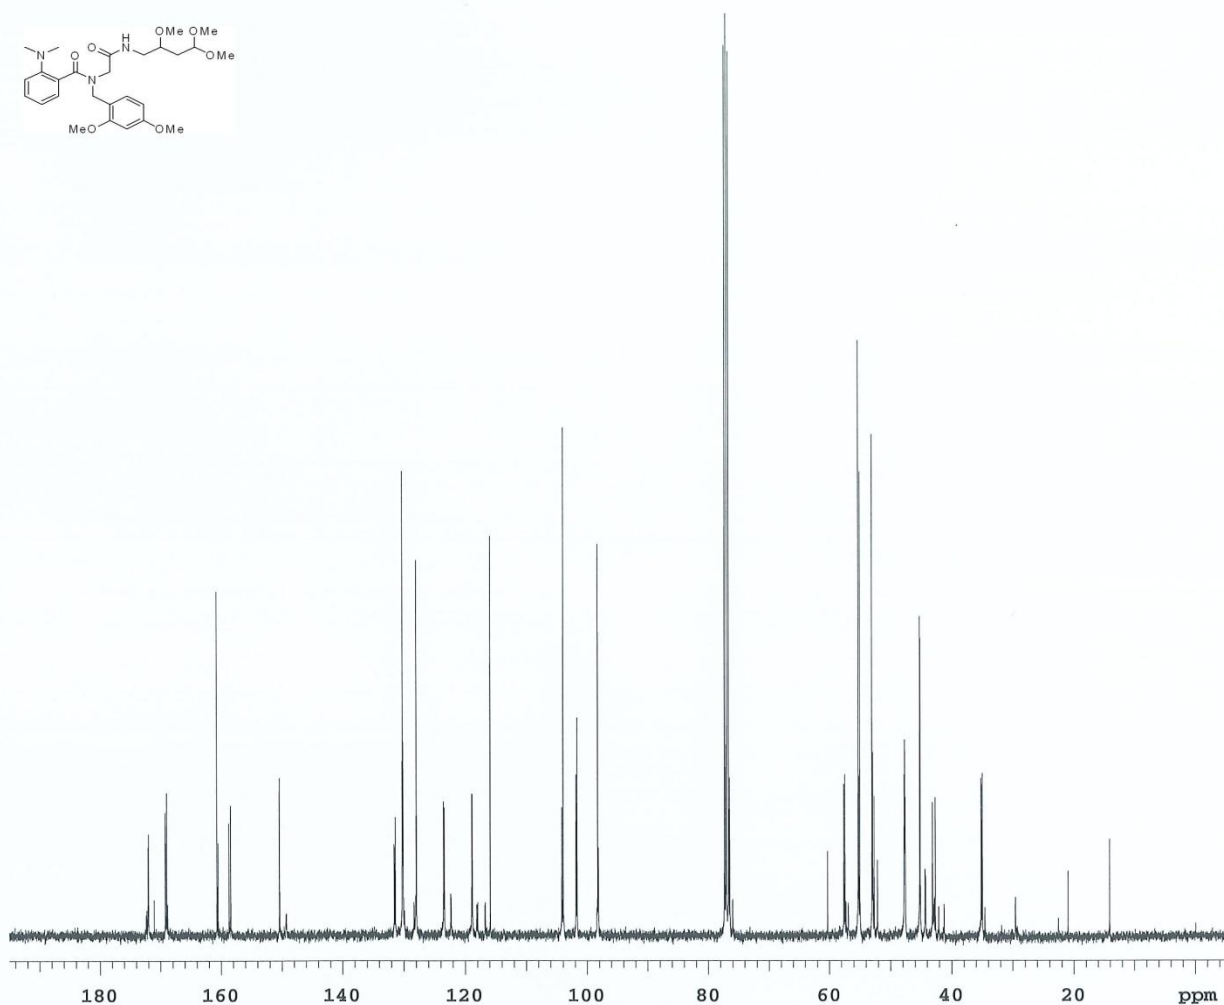

Figure S14:  $^{13}\text{C}$  NMR spectrum of compound 11.

STA636/CDC13/1H  
Stark 20120604  
Mon Jun 4 15:49 2012  
duration: 0h 2min

expl Proton

SAMPLE  
date Jun 4 2012  
samplename STA636  
solvent cdc13  
file exp  
ACQUISITION  
instrum m400  
probe\_ autoX  
seqfil s2pul  
sfrq 399.918  
tn H1  
at 2.561  
np 32768  
sw 6398.0  
bs 4  
tpwr 59  
pw 5.5  
d1 0.439  
d2 0  
tof 368.7  
nt 40  
ct 40  
alock n  
gain not used  
FLAGS  
il n  
in n  
dp y  
DEC. & VT  
dn C13  
dfrq 100.568  
homo n  
dpwr 45  
dof 0  
dms nnn  
dmm c  
dmf 17100  
PROCESSING  
lb 0.40  
wtfile  
proc ft  
fn not used  
DISPLAY  
sp -200.3  
vp 4998.8  
va 170  
sc 0  
wc 225  
hzmh 22.22  
is 500.00  
rf1 797.8  
rfp 0  
th 20.0  
ins 100.000  
rp 32.9  
lp -95.9  
nm cdc ph

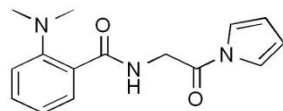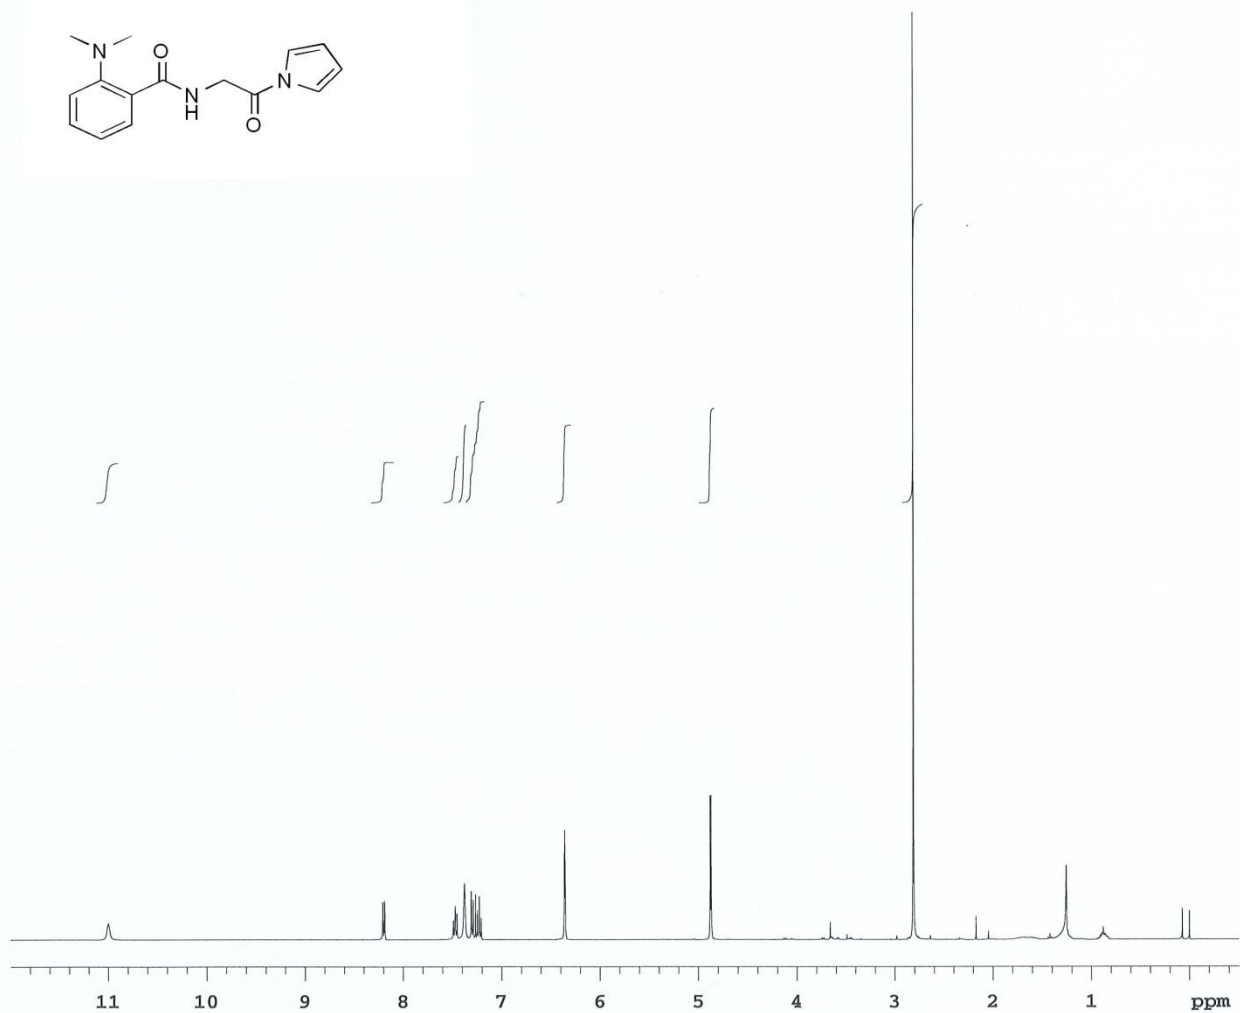

Figure S15:  $^1\text{H}$  NMR spectrum of compound 11'.



STA636/CDCl3/13C  
Stark 20120604

Mon Jun 4 15:51 2012  
duration: 1h 9min

exp2 Carbon

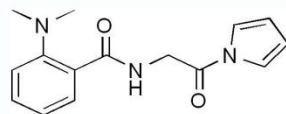

SAMPLE  
date Jun 4 2012  
samplename STA636  
solvent cdcl3  
file exp

ACQUISITION  
instrum m400  
probe\_ autoX  
seqfil s2pul  
sfrq 100.569  
tn C13  
at 1.357  
np 65536  
sw 24154.6  
hs 16  
tpwr 59  
pw 5.7  
d1 2.143  
d2 0  
tof 1020.6  
nt 2048  
ct 1104  
alock n  
gain not used

FLAGS  
il n  
in n  
dp Y

DEC. & VT  
dn H1  
dfrq 399.917  
homo n  
dpwr 39  
dof 0  
dn YYY  
dmm w  
dmf 9300  
pp 14.8

PROCESSING  
lb 0.80  
wtfile  
proc ft  
fn 65536

wexp procplot

DISPLAY  
sp -503.4  
wp 20113.6  
vs 170  
sc 0  
wc 225  
hzm 89.39  
rf1 9263.6  
rfp 7743.0  
th 68.3  
rp 149.5  
lp -198.5  
nm cdc ph

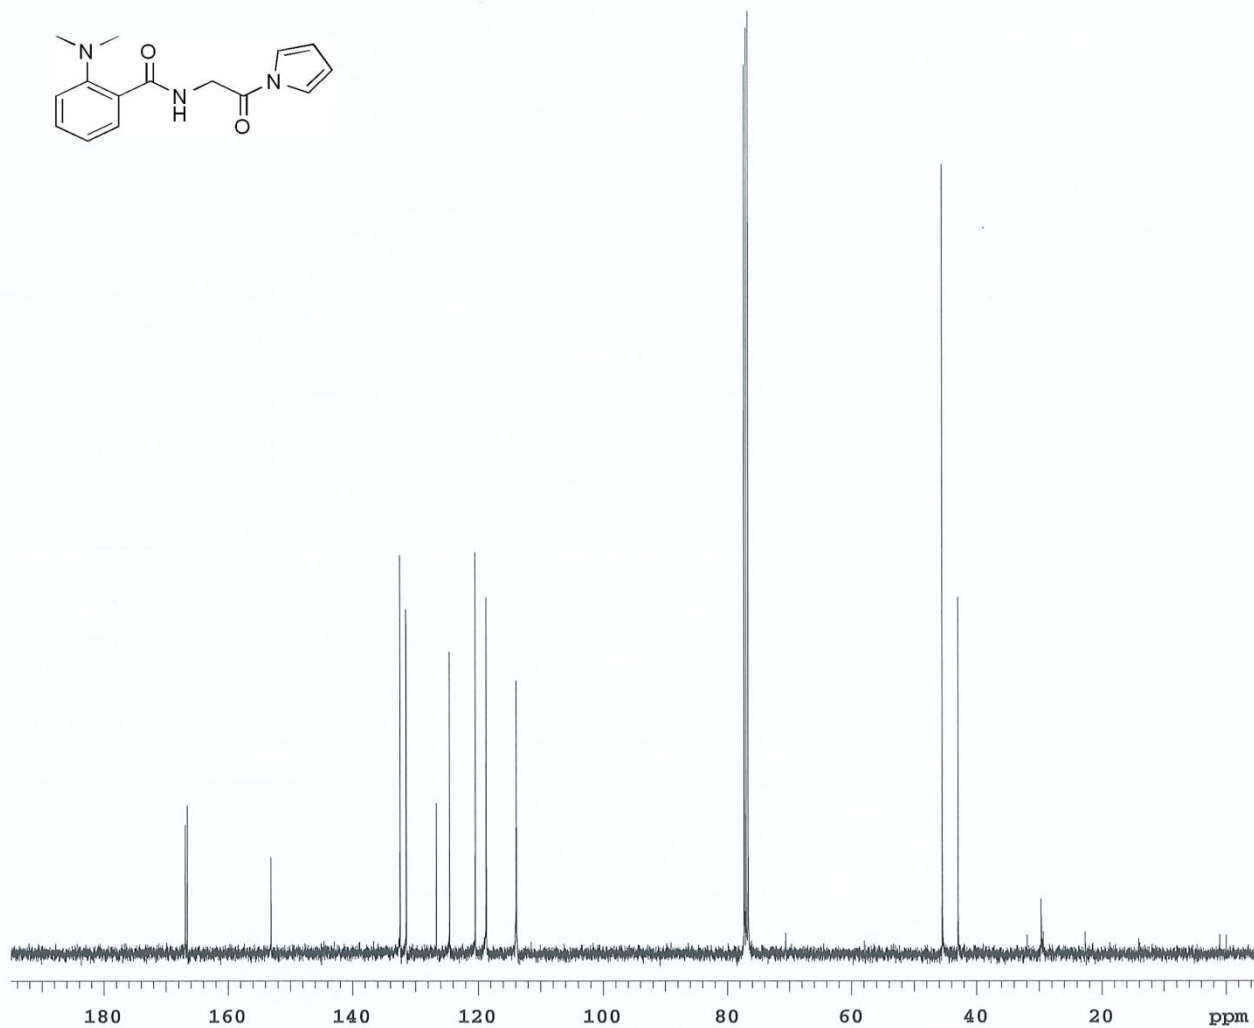

Figure S16: <sup>13</sup>C NMR spectrum of compound 11'.

WNF308/CDC13/1H

Thu Mar 22 17:02 2012

expl Proton

SAMPLE  
date Mar 22 2012  
samplename WNF308  
solvent cdcl3  
file exp

ACQUISITION  
instrum m400  
probe\_ autoX  
seqfil s2pul  
sfrq 399.918  
tn H1  
at 2.561  
np 32768  
sw 6398.0  
hs 4  
tpwr 59  
pw 5.5  
d1 0.439  
d2 0  
tof 368.7  
nt 40  
ct 40  
alock n  
gain not used

FLAGS  
il n  
in n  
dp y

DEC. & VT  
dn C13  
dfrq 100.568  
homo n  
dpwr 45  
dof 0  
dm nnn  
dmm c  
dmf 17100

PROCESSING  
lb 0.40  
wtfile  
proc ft  
fn not used

DISPLAY  
sp -200.1  
vp 4998.8  
vs 162  
sc 0  
wc 225  
hzmm 22.22  
is 378.07  
rfl 790.5  
rfp 0  
th 2.1  
ins 3.000  
rp 21.5  
lp -107.2  
nm ph

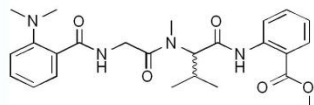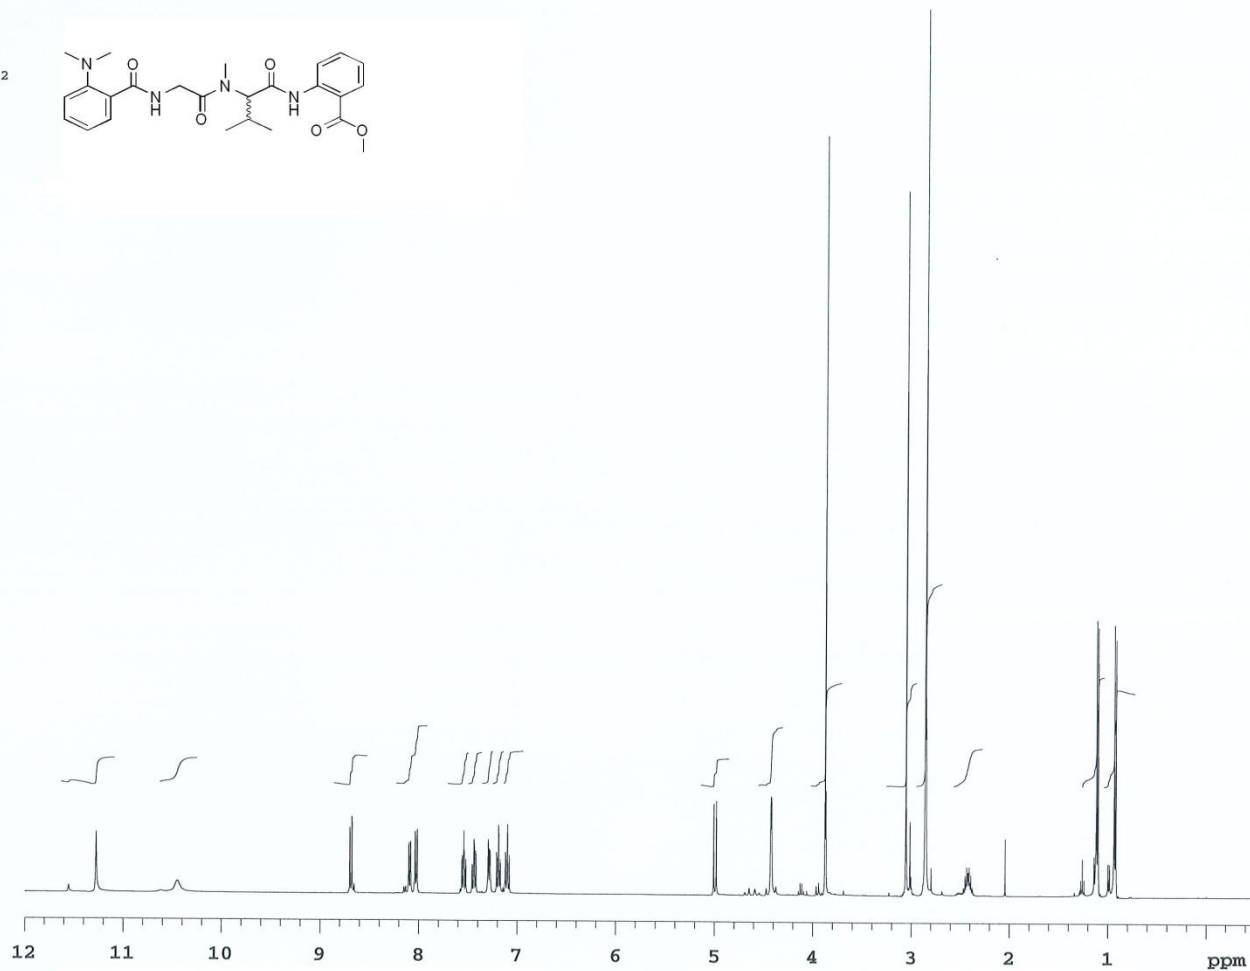

Figure S17: <sup>1</sup>H NMR spectrum of compound 13a.

WNF308/CDCl3/13C

Thu Mar 22 17:04 2012  
duration: 0h 4min

exp2 Carbon

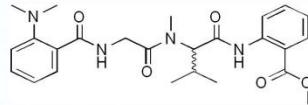

```
SAMPLE
date      Mar 22 2012
samplename WNF308
solvent   cdcl3
file      exp
ACQUISITION
instrum   m400
probe     autoX
seqfil    s2pul
sfrq      100.569
tn         C13
at         1.357
np         65536
sw         24154.6
ba         16
tpwr       59
pw         5.7
d1         2.143
d2         0
tof        1020.6
nt         2048
ct         64
alock     n
gain      not used
FLAGS
il         n
in         n
dp         y
DEC. & VT
dn         H1
dfrq      399.917
homo       n
dpwr       39
dof         0
dm         yyy
dmm        w
dmf         9300
pp         14.8
PROCESSING
lb         0.80
wtfile
proc       ft
fn         65536
wexp      procplot
DISPLAY
sp         -714.9
wp         19894.7
vs         113
sc         0
wc         225
hzmm       88.42
rf1        9268.8
rfp        7743.0
th         6.8
rp         -172.7
lp         -299.3
nm cdc ph
```

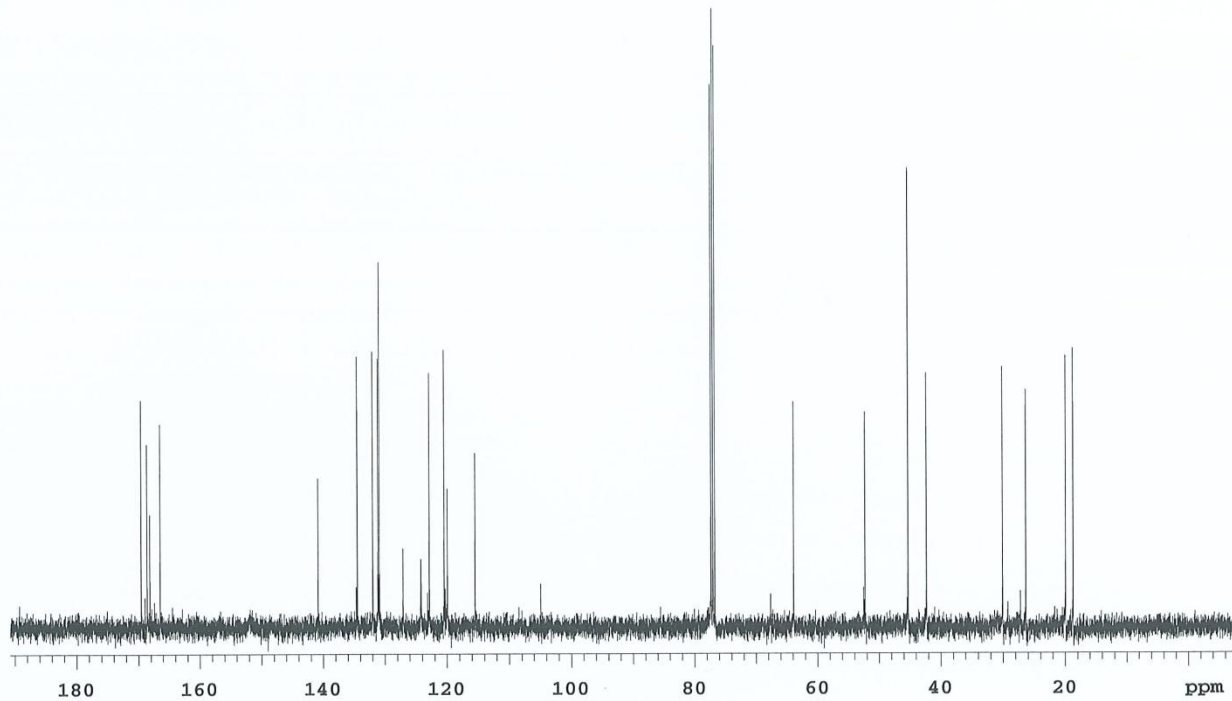

Figure S18:  $^{13}\text{C}$  NMR spectrum of compound 13a.

Tue May 10 11:14 2011

expl Proton

```
SAMPLE
date May 10 2011
samplename WNF172i
solvent cdcl3
file exp
ACQUISITION
instrum m400
probe_ autoX
seqfil s2pu1
sfrq 399.918
tn H1
at 2.561
np 32768
sw 6398.0
ba 4
tpwr 59
pw 5.5
d1 0.439
d2 0
tof 368.7
nt 40
ct 20
alock n
gain not used
FLAGS
il n
in n
dp y
DEC. & VT
dn C13
dfrq 100.568
homo n
dpwr 45
dof 0
dm nnn
dmm c
dmf 17100
PROCESSING
lb 0.40
vtfile
proc ft
fn not used
DISPLAY
sp -799.1
wp 6397.6
vs 162
sc 0
wc 225
hnm 28.43
is 292.18
rf1 799.5
rfp 0
th 4.1
ins 6.000
rp 4.5
lp -102.2
nm ph
```

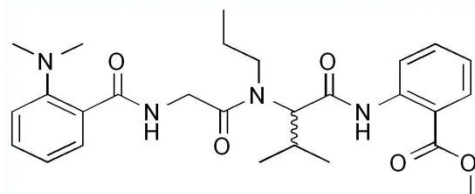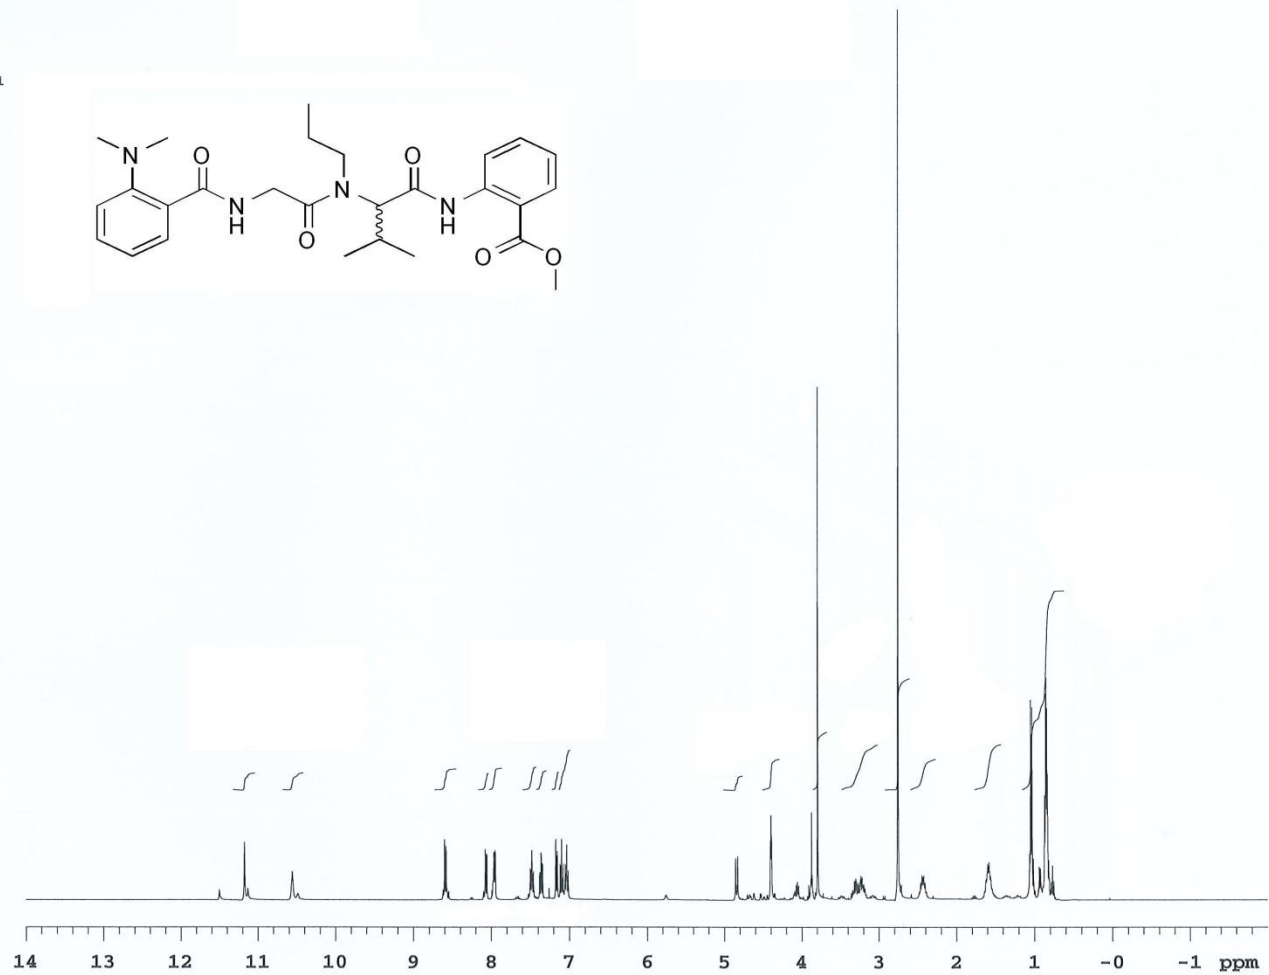

Figure S19:  $^1\text{H}$  NMR spectrum of compound **13b**.

Tue May 10 11:15 2011  
duration: 0h 5min

exp2 Carbon

SAMPLE  
date May 10 2011  
samplename WNF172i  
solvent cdcl3  
file exp

ACQUISITION  
instrum m400  
probe\_ autoX  
seqfil s2pul  
sfrq 100.569  
tn C13  
at 1.357  
np 65536  
sv 24154.6  
hs 16  
tpwr 59  
pw 5.7  
d1 2.143  
d2 0  
tof 1020.6  
nt 2048  
ct 80  
alock n  
gain not used

FLAGS  
il n  
in n  
dp y

DEC. & VT  
dn H1  
dfrq 399.917  
homo n  
dpwr 39  
dof 0  
dm yyy  
dnn w  
dmf 9300  
pp 14.8

PROCESSING  
lb 0.80  
wtfile  
proc ft  
fn 65536

wexp procplo  
DISPLAY  
ap -1517.9  
wp 24153.9  
vs 80  
sc 0  
wc 225  
hzmm 107.35  
rf1 1518.6  
rfp 0  
th 7.4  
rp 132.8  
lp -239.4  
nm cdc ph

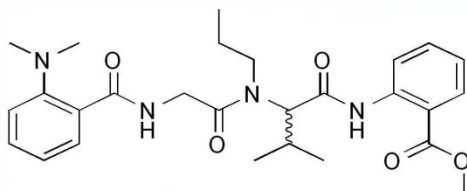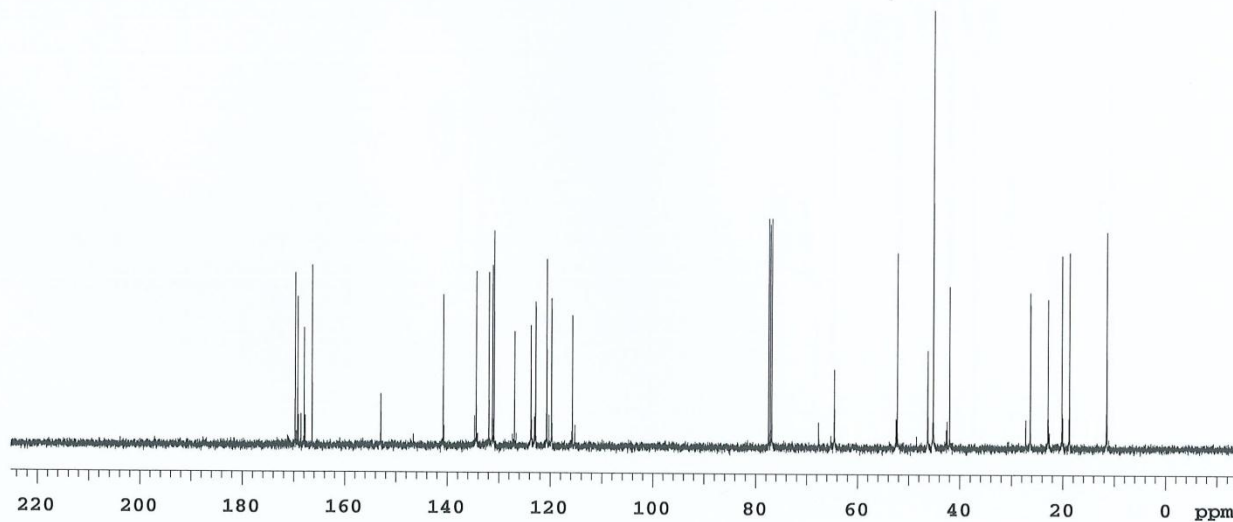

Figure S20:  $^{13}\text{C}$  NMR spectrum of compound 13b.

Tue May 10 15:31 2011

expl Proton

SAMPLE  
date May 10 2011  
samplename WNF172B  
solvent cdcl3  
file exp

ACQUISITION  
instrum m400  
probe\_ autox  
seqfil s2pul  
sfrq 399.918  
tn H1  
at 2.561  
np 32768  
sw 6398.0  
bs 4  
tpwr 59  
pw 5.5  
d1 0.439  
d2 0  
tof 368.7  
nt 40  
ct 40  
alock n  
gain not used

FLAGS  
il n  
in n  
dp y

DEC. & VT  
dn C13  
dfrq 100.568  
homo n  
dpwr 45  
dof 0  
dm nnn  
dmm c  
dmf 17100

PROCESSING  
lb 0.40  
wtfile  
proc ft  
fn not used

DISPLAY  
sp -200.1  
wp 4998.8  
vs 162  
sc 0  
wc 225  
hzmm 22.22  
is 349.46  
rf1 799.5  
rfp 0  
th 4.1  
ins 6.000  
rp 2.0  
lp -101.6  
nm ph

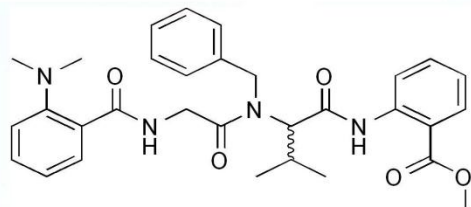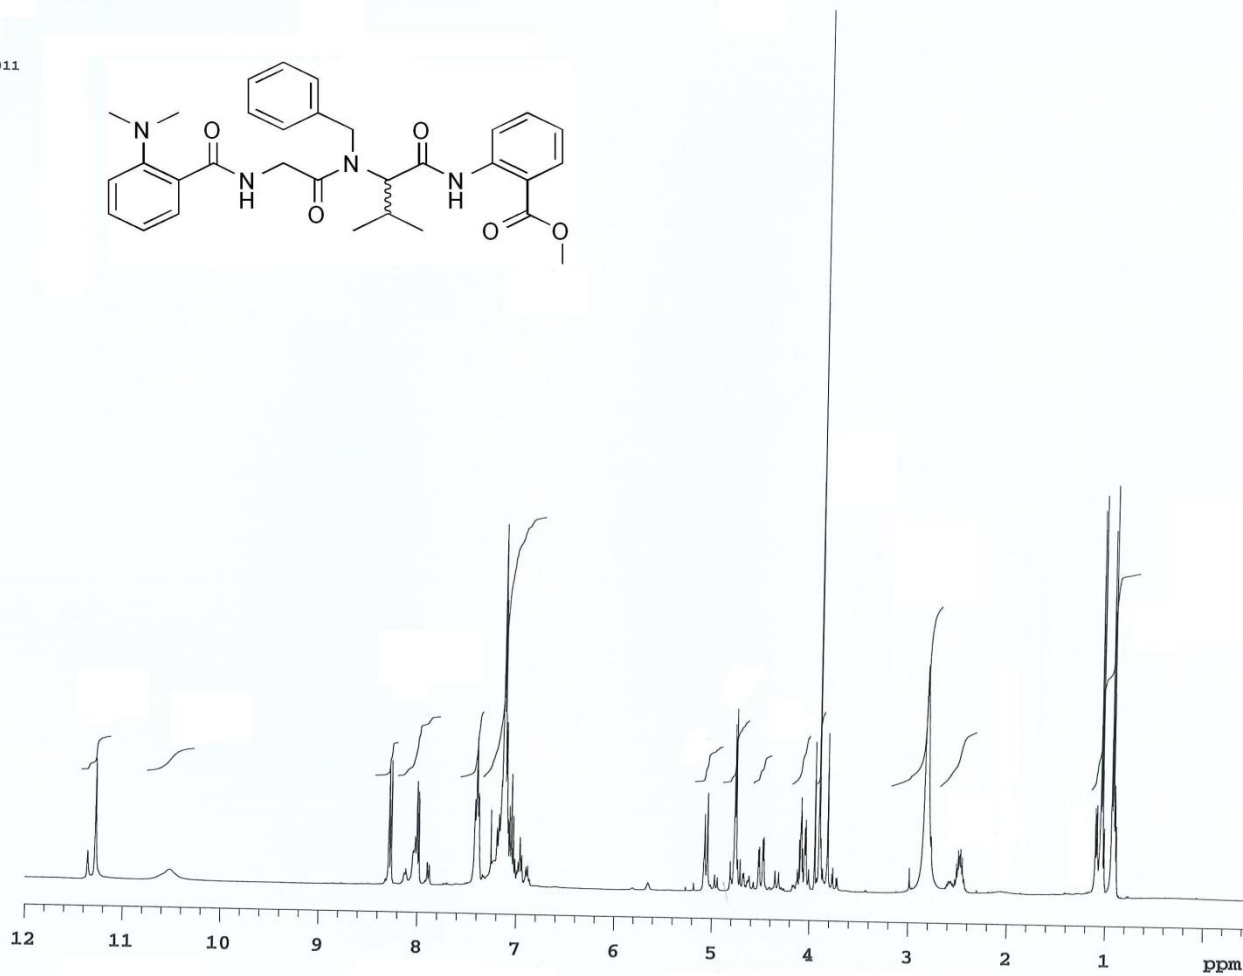

Figure S21: <sup>1</sup>H NMR spectrum of compound 13c.

Tue May 10 15:34 2011  
duration: 1h 54min

exp2 Carbon

```
SAMPLE
date      May 10 2011
samplename WNF172B
solvent   cdcl3
file      exp
ACQUISITION
instrum   m400
probe_    autoX
seqfil    s2pul
sfrq      100.629
tn         C13
at         1.357
np         65536
sw         24154.6
bs         16
tpwr       59
pw         5.7
d1         2.143
d2         0
tof        1020.6
nt         2048
ct         864
alock     n
gain      not used
FLAGS
il         n
in         n
dp         y
DEC. & VT
dn         H1
dfrq       399.917
homo       n
dpwr       39
dof        0
da         yyy
dnu        w
dmf        9300
pp         14.8
PROCESSING
lb         0.80
wtfile
proc       ft
fn         65536
wexp       procpilot
DISPLAY
sp         -1517.9
vp         24153.9
vs         72
sc         0
vc         225
hzmm       107.35
rfl        1518.6
rfp        0
th         5.3
xp         146.5
lp         -266.5
nm cdc ph
```

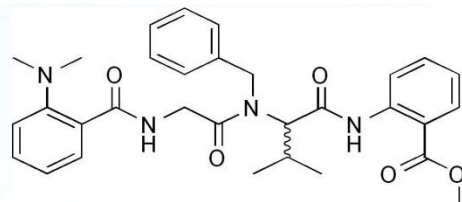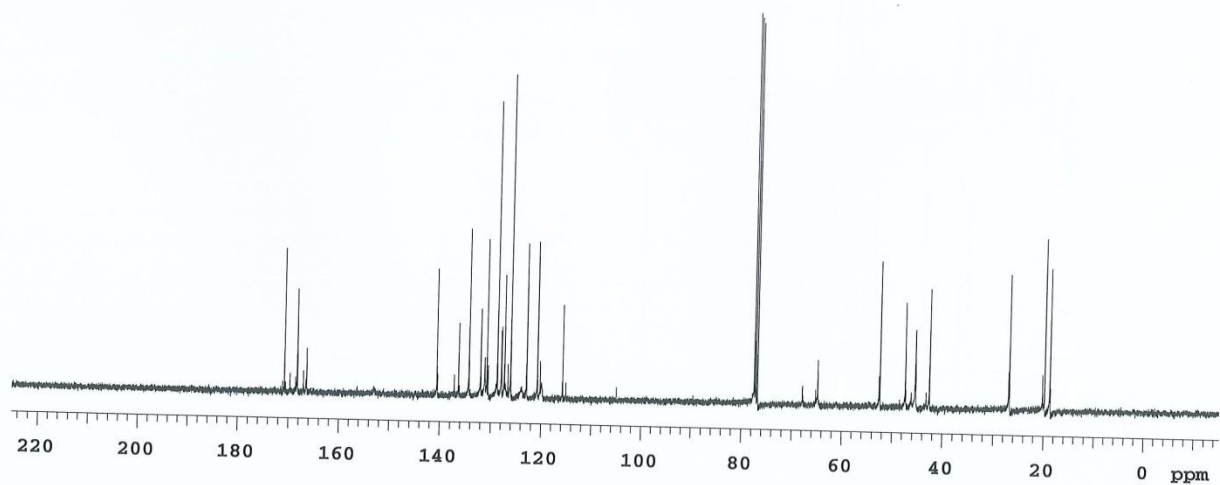

Figure S22:  $^{13}\text{C}$  NMR spectrum of compound 13c.

Thu Dec 16 17:20 2010

expl Proton

SAMPLE  
date Dec 16 2010  
samplename WNF170B  
solvent cdcl3  
file exp

ACQUISITION  
instrum m400  
probe\_ autoX  
seqfil s2pul  
sfrq 399.918  
tn H1  
at 2.561  
np 32768  
sw 6398.0  
bs 4  
tpwr 59  
pw 5.5  
d1 0.439  
d2 0  
tof 368.7  
nt 40  
ct 40  
alock n  
gain not used

FLAGS  
il n  
in n  
dp y

DEC. & VT  
dn C13  
dfrq 100.568  
homo n  
dpwr 45  
dof 0  
dm nm  
dmm c  
dmf 17100

PROCESSING  
lb 0.40  
wtfile  
proc ft  
fn not used

DISPLAY  
sp -200.3  
wp 5198.7  
vs 162  
sc 0  
wc 225  
hzmm 23.11  
is 492.70  
rf1 795.4  
rfp 0  
th 4.1  
ins 6.000  
rp 2.8  
lp -103.2  
nm ph

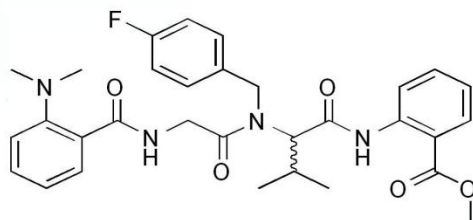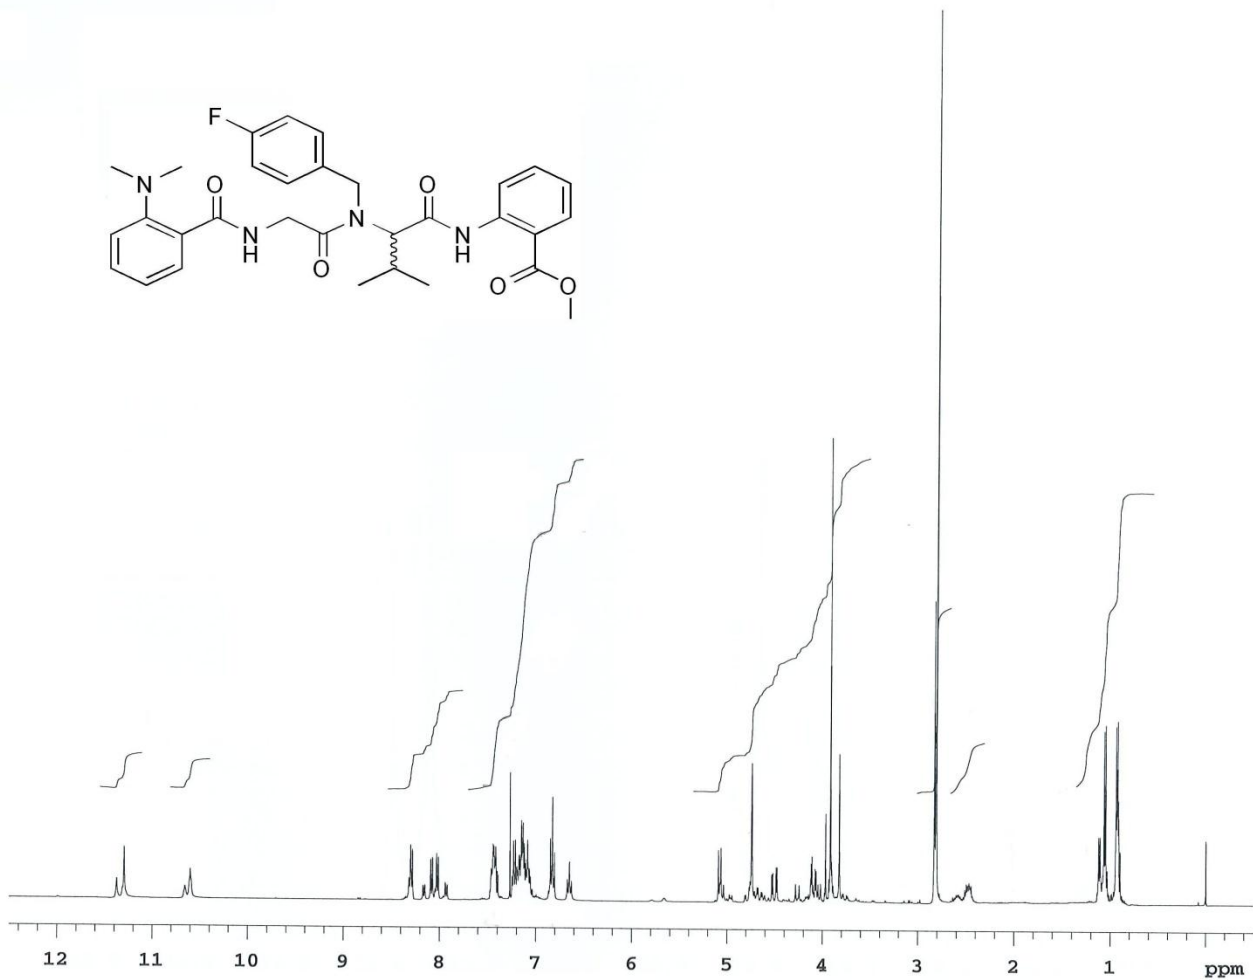

Figure S23: <sup>1</sup>H NMR spectrum of compound 13d.



Thu Dec 16 17:22 2010  
duration: 2h 9min

exp2 Carbon

```
SAMPLE
date Dec 16 2010
samplename WN170B
solvent cdcl3
file exp
ACQUISITION
instrum m400
probe_ autoX
seqfil s2pul
sfrq 100.569
tn C13
at 1.357
np 65536
sw 24154.6
hs 16
tpwr 59
pw 5.7
d1 2.143
d2 0
tof 1020.6
nt 2048
ct 2048
alock n
gain not used
FLAGS
il n
in n
dp y
DEC. & VT
dn H1
dfrq 399.917
homo n
dpwr 39
dof 0
dm yyy
dmm w
dmf 9300
dp 14.8
PROCESSING
lb 0.80
wtfile
proc ft
fn 65536
wexp procplot
DISPLAY
sp -393.0
wp 18379.8
vs 149
sc 0
wc 225
hzmm 81.69
rfl 1518.6
rfp 0
th 5.3
rp 175.4
lp -207.4
nm cdc ph
```

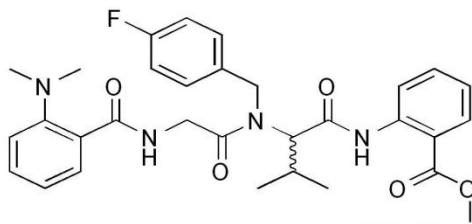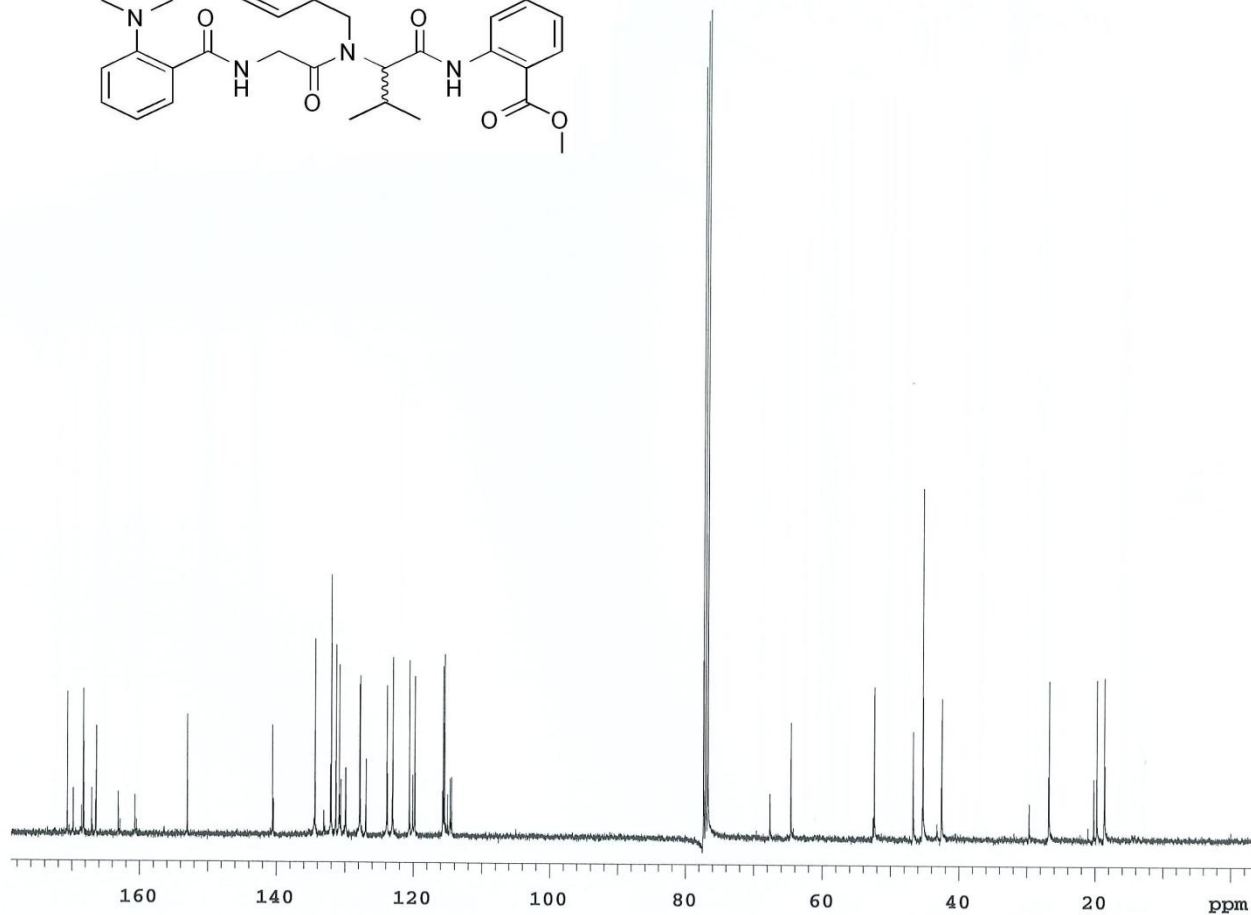

Figure S24:  $^{13}\text{C}$  NMR spectrum of compound 13d.

Mon Dec 6 19:32 2010

exp1 Proton

SAMPLE  
date Dec 6 2010  
samplename WN1721A  
solvent cdcl3  
file exp

ACQUISITION  
instrum m400  
probe\_ autoX  
seqfil #2pu1  
sfrq 399.918  
tn H1  
at 2.561  
np 32768  
sv 6398.0  
hs 4  
tpwr 59  
pw 5.5  
d1 0.439  
d2 0  
tof 368.7  
nt 40  
ct 24  
alock n  
gain not used

FLAGS  
il n  
in n  
dp y  
DEC. & VT  
dn C13  
dfrq 100.568  
homo n  
dpr 45  
dof 0  
dm nnn  
dum c  
dmf 17100

PROCESSING  
lb 0.40  
wtfile  
proc ft  
fn not used

DISPLAY  
sp -200.3  
wp 4998.8  
vs 162  
sc 0  
wc 225  
hzm 22.22  
is 629.89  
xfl 785.7  
zfp 0  
th 5.8  
ins 1.000  
rp 5.7  
lp -100.8  
nm ph

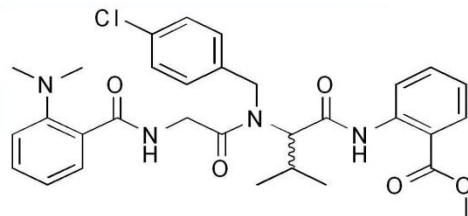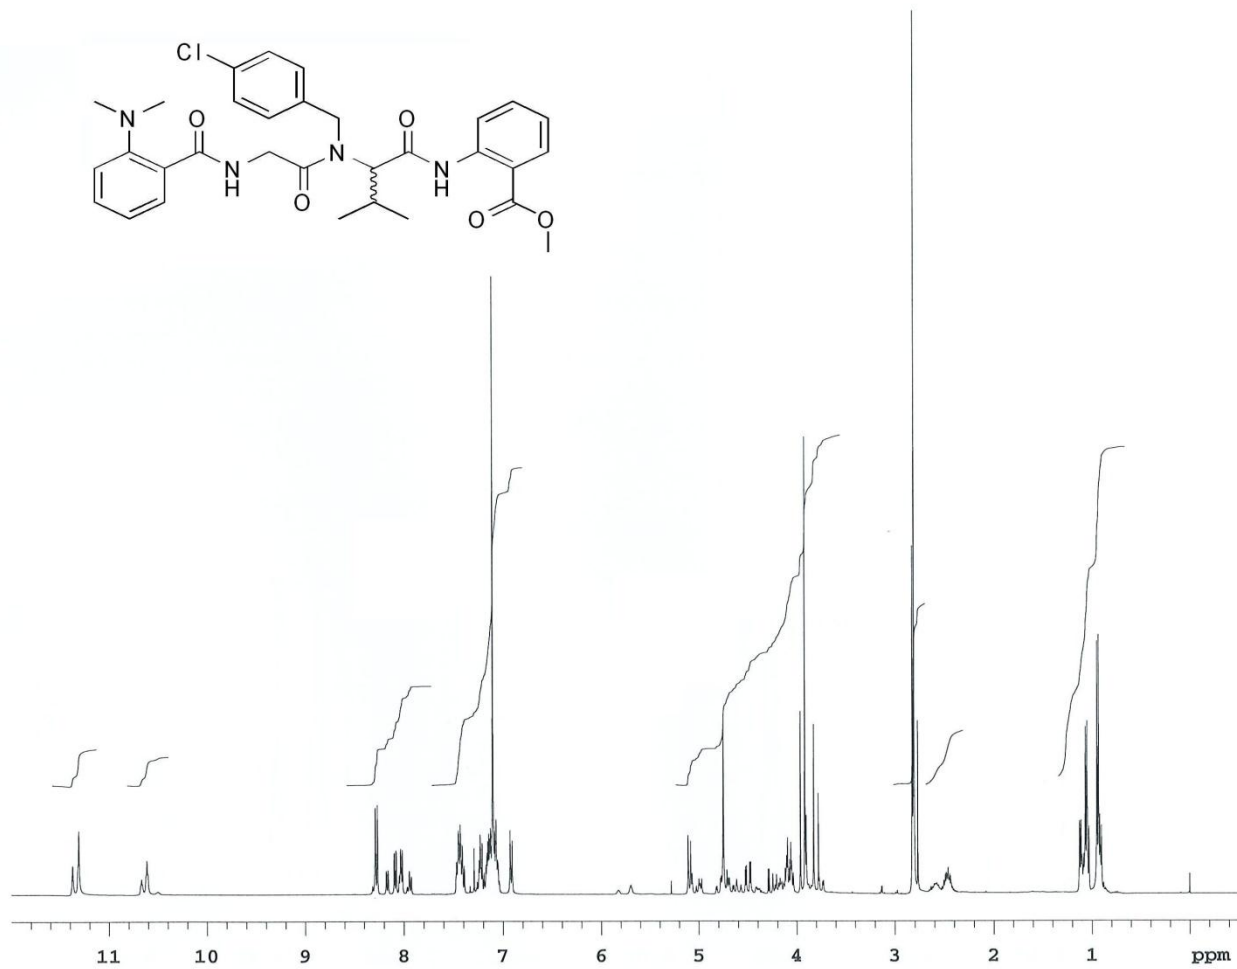

Figure S25: <sup>1</sup>H NMR spectrum of compound 13e.

Mon Dec 6 19:33 2010  
duration: 0h 7min

exp2 Carbon

```
SAMPLE
date Dec 6 2010
samplename WNF1721A
solvent cdcl3
file exp
ACQUISITION
instrum m400
probe_ autoX
seqfil s2pul
sfrq 100.569
tn C13
at 1.357
np 65536
sw 24154.6
bs 16
tpwr 59
pw 5.7
d1 2.143
d2 0
tof 1020.6
nt 2048
ct 112
alock n
gain not used
FLAGS
il n
in n
dp y
DEC. & VT
dn H1
dfrq 399.917
homo n
dpwr 39
dof 0
dm yyy
dmm w
dmf 9300
pp 14.8
PROCESSING
lb 0.80
wtfile
proc ft
fn 65536
wexp procpplot
DISPLAY
sp -1517.9
wp 24153.9
vs 80
sc 0
wc 225
hzmm 107.35
rfl 1518.6
rfp 0
th 4.2
xp 170.2
lp -256.3
nm cdc ph
```

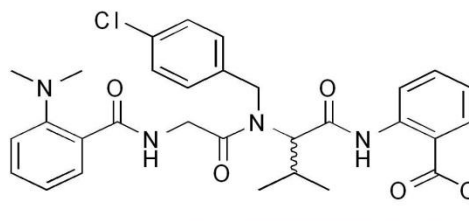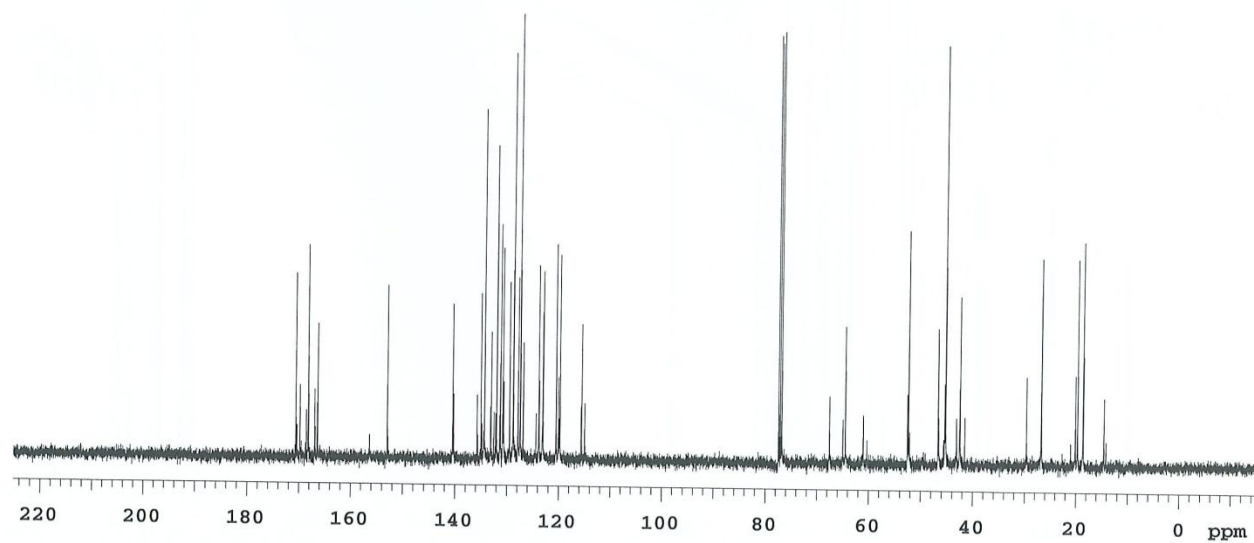

Figure S26: <sup>13</sup>C NMR spectrum of compound 13e.

Tue May 10 16:29 2011

expl Proton

SAMPLE

date May 10 2011  
samplename WNF172G  
solvent cdcl3  
file exp

ACQUISITION

instrum m400  
probe\_ autoX  
seqfil s2pul  
sfrq 399.918  
tn H1  
at 2.561  
np 32768  
sw 6398.0  
bs 4  
tpwr 59  
pw 5.5  
d1 0.439  
d3 0  
tof 368.7  
nt 40  
ct 20  
alock n  
gain not used

FLAGS

il n  
in n  
dp y

DEC. & VT

dn C13  
dfrq 100.568  
homo n  
dpwr 45  
dof 0  
dm nnn  
dmm c  
dmf 17100

PROCESSING

lb 0.40  
wtfile  
proc ft  
fn not used

DISPLAY

sp -0.1  
wp 4998.8  
vs 162  
sc 0  
wc 225  
hzm 22.22  
is 489.02  
rf1 799.5  
rfp 0  
th 4.1  
ins 6.000  
rp 2.6  
lp -86.0  
nm ph

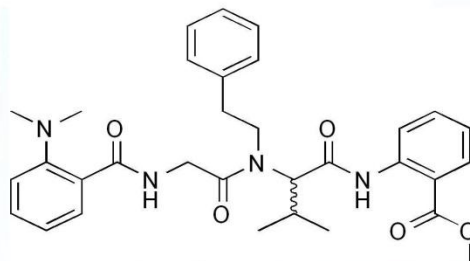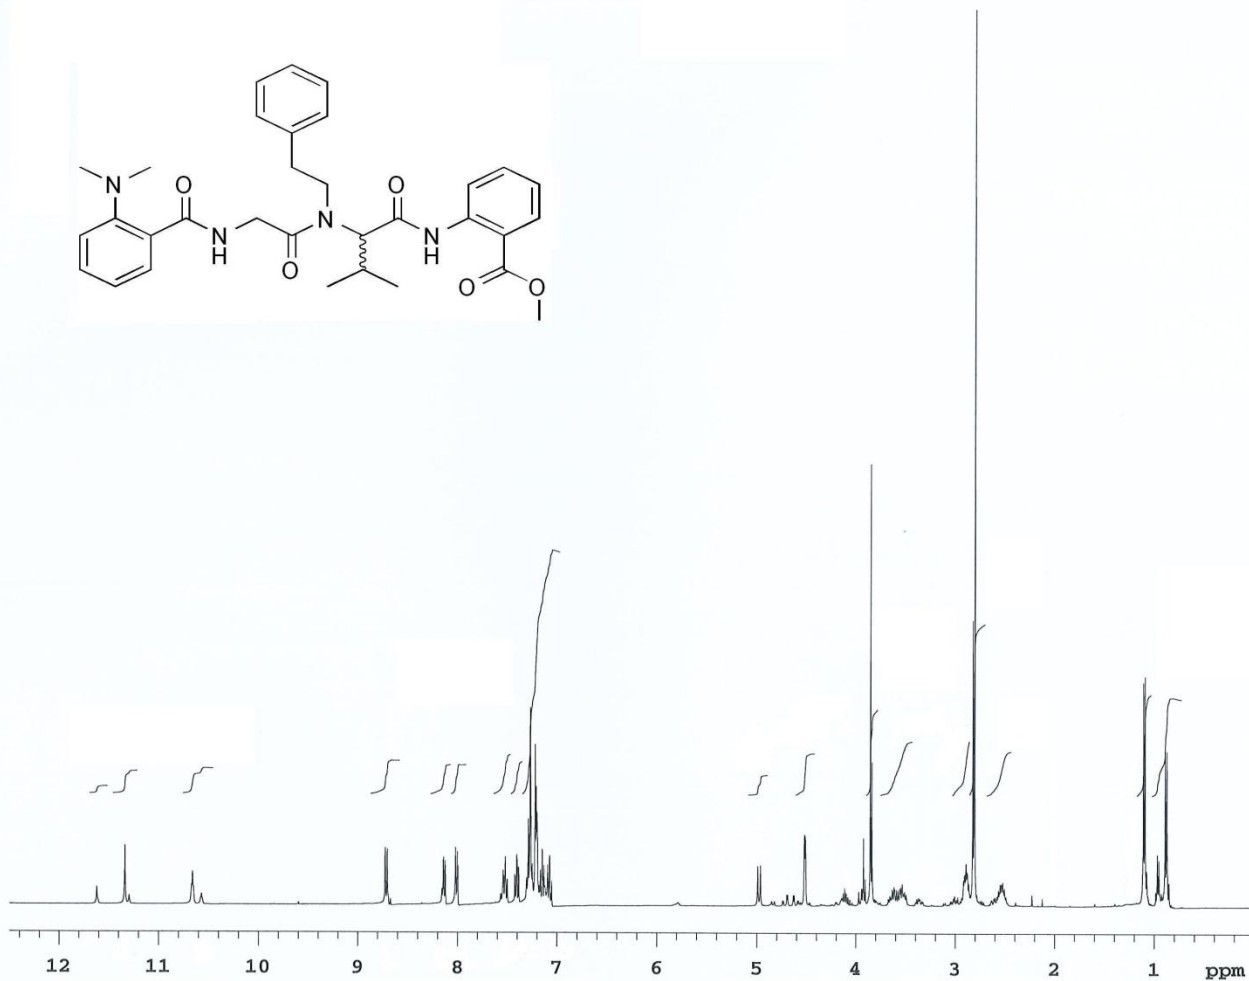

Figure S27:  $^1\text{H}$  NMR spectrum of compound 13f.

Tue May 10 16:30 2011  
duration: 2h 9min

exp2 Carbon

```
SAMPLE
date May 10 2011
samplename WNF1720
solvent cdc13
file exp
ACQUISITION
instrum m400
probe_ autoX
seqfil s2pul
sfrq 100.569
tn C13
at 1.357
np 65536
sw 24154.6
bs 16
tpwr 59
pw 5.7
d1 2.143
d2 0
tof 1020.6
nt 2048
ct 2048
alock n
gain not used
PLANS
il n
in n
dp y
DEC. & VT
dn H1
dfrq 399.917
homo n
dpwr 39
dof 0
dm yyy
dmm w
dmf 9300
pp 14.8
PROCESSING
lb 0.80
wtfile
proc ft
fn 65536
wexp procp1ot
DISPLAY
sp -1517.9
wp 24153.9
vs 80
sc 0
wc 225
hzmm 107.35
rf1 1518.6
rfp 0
th 68.3
rp -166.9
lp -248.5
nm cdc ph
```

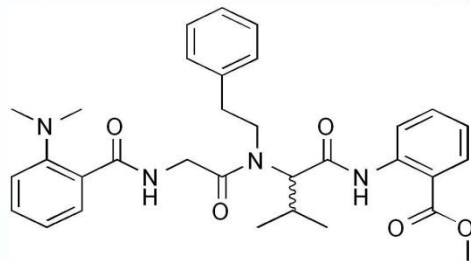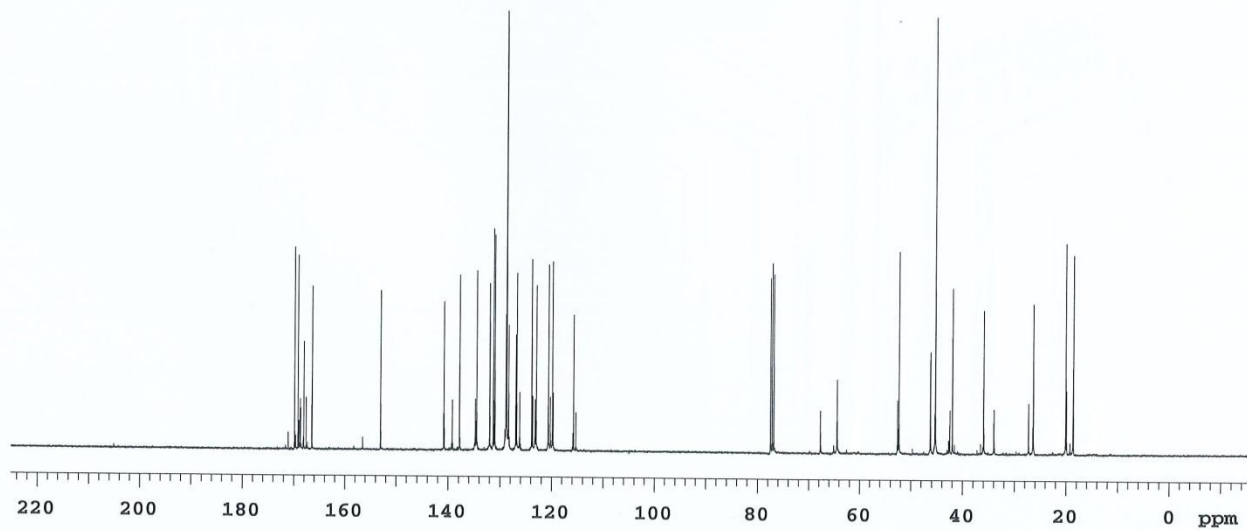

Figure S28: <sup>13</sup>C NMR spectrum of compound 13f.

Tue Nov 29 16:55 2011

exp3 Proton

```
SAMPLE
date Nov 29 2011
samplename WNFI731
solvent dms0
file exp
ACQUISITION
instrum m400
probe_ autoX
seqfil s2pul
sfrq 399.920
tn H1
at 2.561
np 32768
sw 6398.0
bs 4
tpwr 59
pw 5.5
d1 0.439
d2 0
tof 368.7
nt 40
ct 32
alock n
gain not used
FLAGS
il n
in n
dp y
DEC. & VT
dn C13
dfrq 100.569
homo n
dpwr 45
dof 0
dn mm
dms c
dnf 17100
PROCESSING
lb 0.40
wtfile
proc ft
fn not used
DISPLAY
sp -117.5
vp 4526.3
vs 160
sc 0
vc 225
hzmm 20.12
is 286.47
rfl 1792.1
rfs 1000.2
th 6.3
ins 6.000
rp -1.8
lp -94.4
nm ph
```

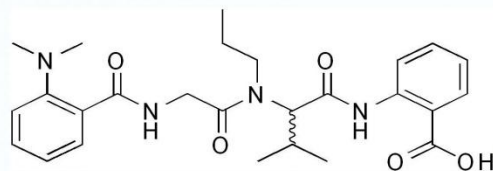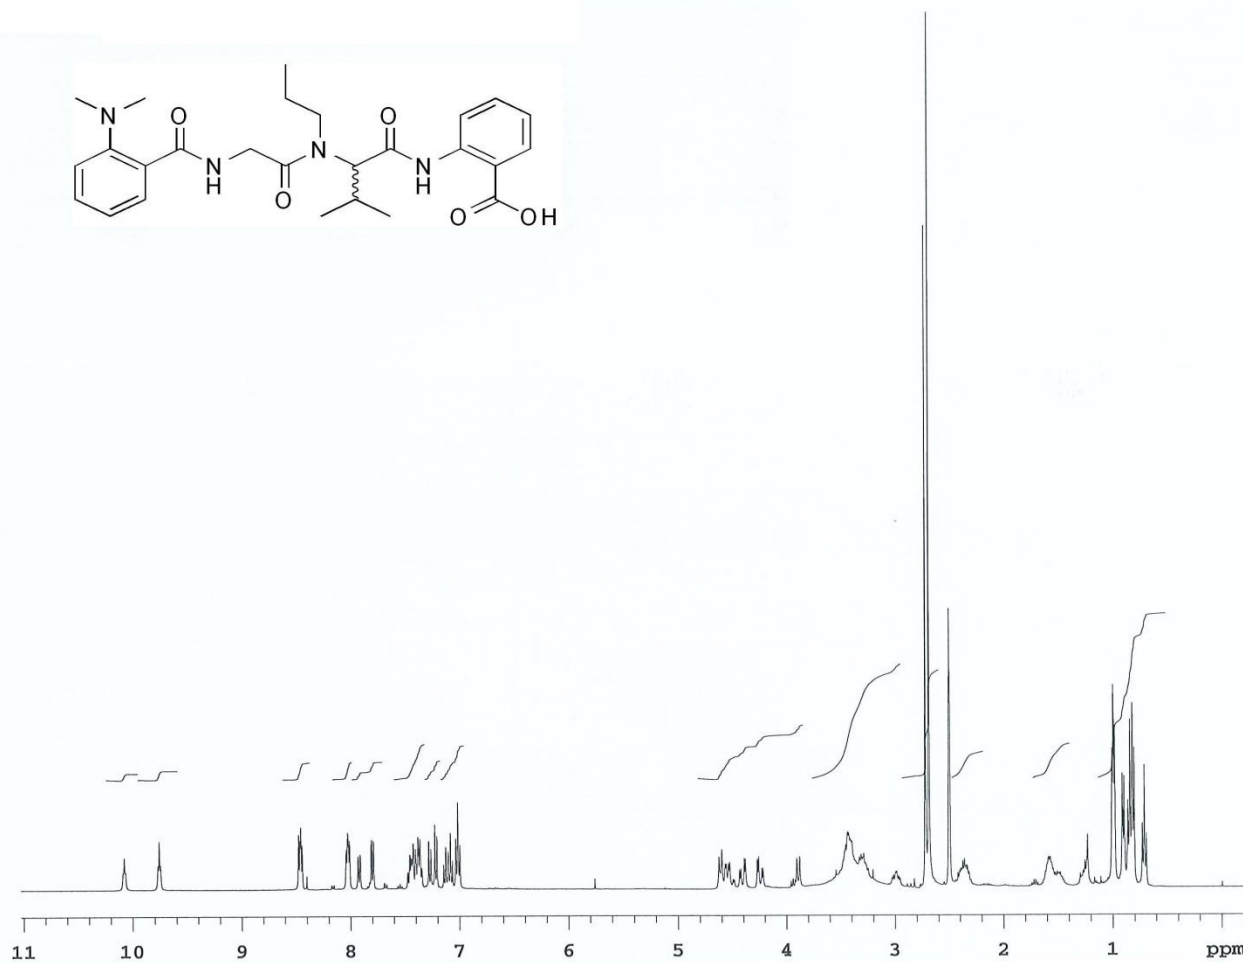

Figure S29: <sup>1</sup>H NMR spectrum of compound 14b.

WNF1731/DMSO/13C

Tue Nov 29 16:57 2011  
duration: 16h 46min

exp4 Carbon

```
SAMPLE
date Nov 29 2011
samplename WNF1731
solvent dms0
file exp
ACQUISITION
instrum m400
probe_ autoX
seqfil s2pul
sfrq 100.570
tn C13
at 1.357
np 65536
sw 24154.6
bs 16
tpwr 59
pw 5.7
d1 2.143
d2 0
tof 1020.6
nt 15000
ct 15000
alock n
gain not used
FLAGS
il n
in n
dp y
DEC. & VT
dn H1
dfrq 399.919
homo n
dpwr 39
dof 0
dm YYY
dmm w
dmf 9300
pp 14.8
PROCESSING
lb 0.80
wtfile
proc ft
fn 65536
wekp procplot
DISPLAY
sp 502.3
wp 17599.2
vs 1600
sc 0
wc 225
hzmm 78.22
rf1 5534.6
rfp 3972.1
th 13.1
rp -151.6
lp -247.9
nm cdc ph
```

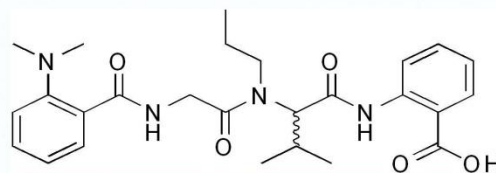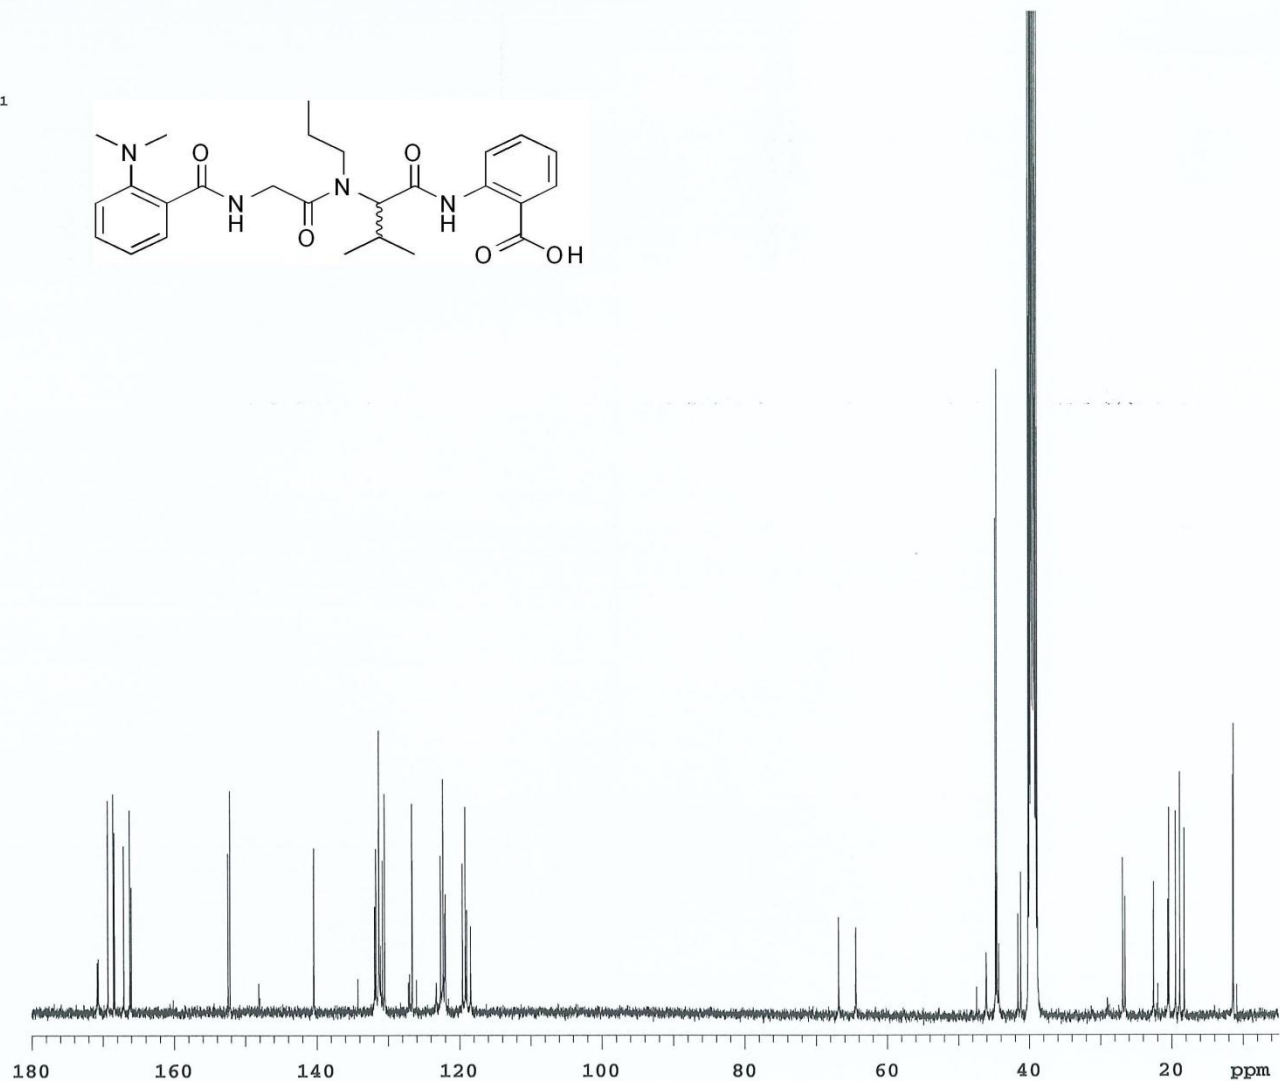

Figure S30:  $^{13}\text{C}$  NMR spectrum of compound 14b.

Thu Dec 1 17:32 2011

exp3 Proton

SAMPLE  
date Dec 1 2011  
samplename WNF173b  
solvent dmsc  
file exp

ACQUISITION  
instrum m400  
probe\_ autoX  
seqfil s2pul  
sfrq 399.920  
tn H1  
at 2.561  
np 32768  
sw 6398.0  
bs 4  
tpwr 59  
pw 5.5  
d1 0.439  
d2 0  
tof 368.7  
nt 40  
ct 40  
alock n  
gain not used

FLAGS  
il n  
in n  
dp y

DEC. & VT  
dn C13  
dfrq 100.569  
homo n  
dpwr 45  
dof 0  
dm nnn  
dnn c  
dmf 17100

PROCESSING  
lb 0.40  
wtfile  
proc ft  
fn not used

DISPLAY  
sp -88.6  
vp 4774.6  
vs 153  
sc 0  
vc 225  
hmm 21.22  
is 438.66  
rf1 790.4  
rfp 0  
th 2.1  
ins 6.000  
rp 11.0  
lp -97.1  
nm ph

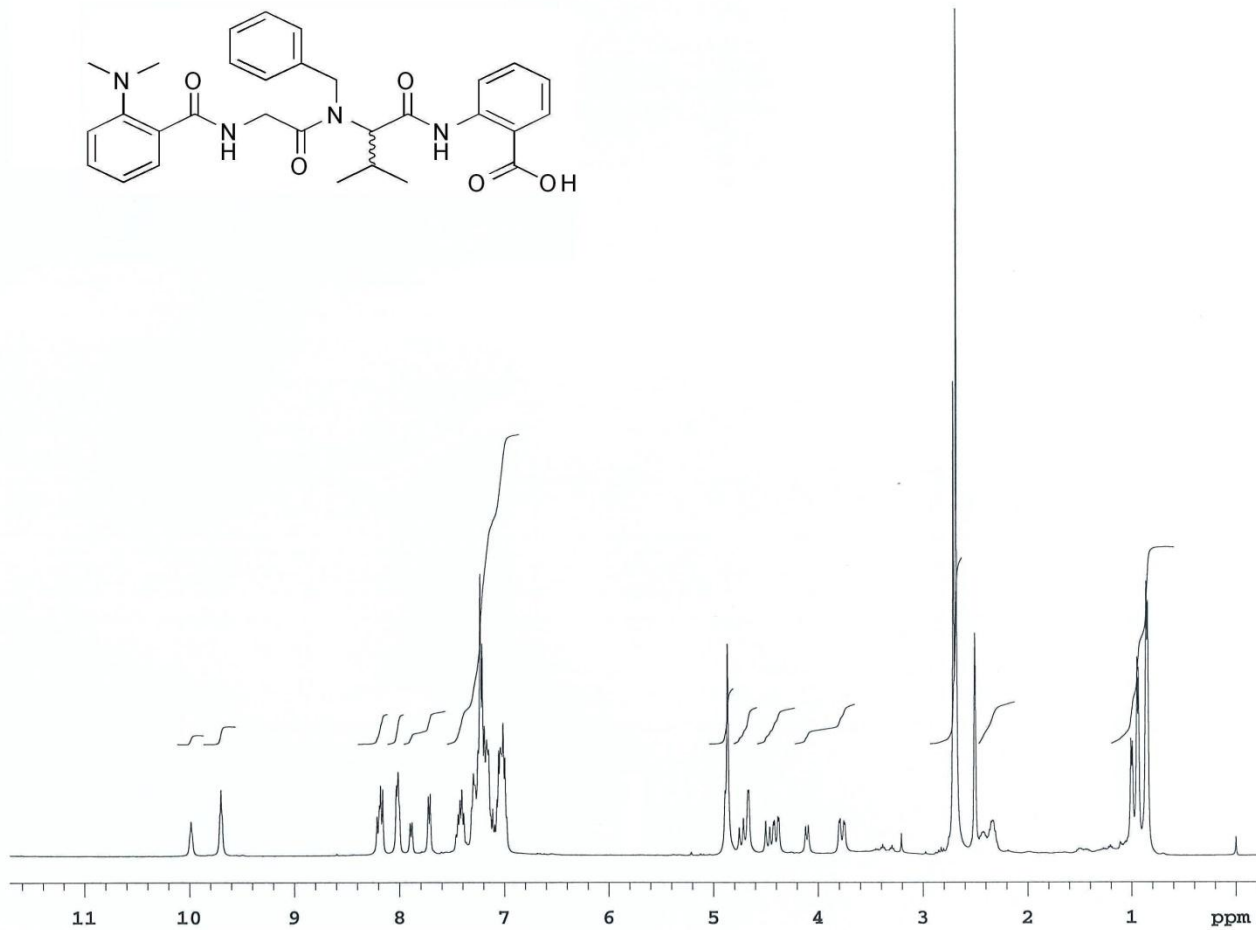

Figure S31: <sup>1</sup>H NMR spectrum of compound 14c.



Thu Dec 1 17:34 2011  
duration: 16h 46min

exp4 Carbon

SAMPLE  
date Dec 1 2011  
samplename WN173b  
solvent dms  
file exp

ACQUISITION  
instrum m400  
probe\_ autoX  
seqfil s2pul  
sfrq 100.570  
tm c13  
at 1.357  
np 65536  
sw 24154.6  
hs 16  
tpwx 59  
pw 5.7  
d1 2.143  
d2 0  
tof 1020.6  
nt 15000  
ct 15000  
alock n  
gain not used

FLAGS  
il n  
in n  
dp y

DEC. & VT  
dn H1  
dfrq 399.919  
homo n  
dpwr 39  
dof 0  
dn YYY  
dmm w  
dmf 9300  
pp 14.8

PROCESSING  
lb 0.80  
wtfile  
proc ft  
fn 65536

wekp procplot  
DISPLAY  
sp -1517.8  
wp 24153.9  
vs 968  
sc 0  
wc 225  
hzmm 107.35  
rf1 1518.6  
xrp 0  
th 68.3  
rp 127.8  
lp -253.6  
nm cdc ph

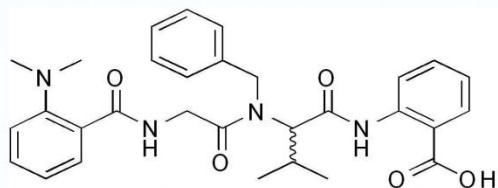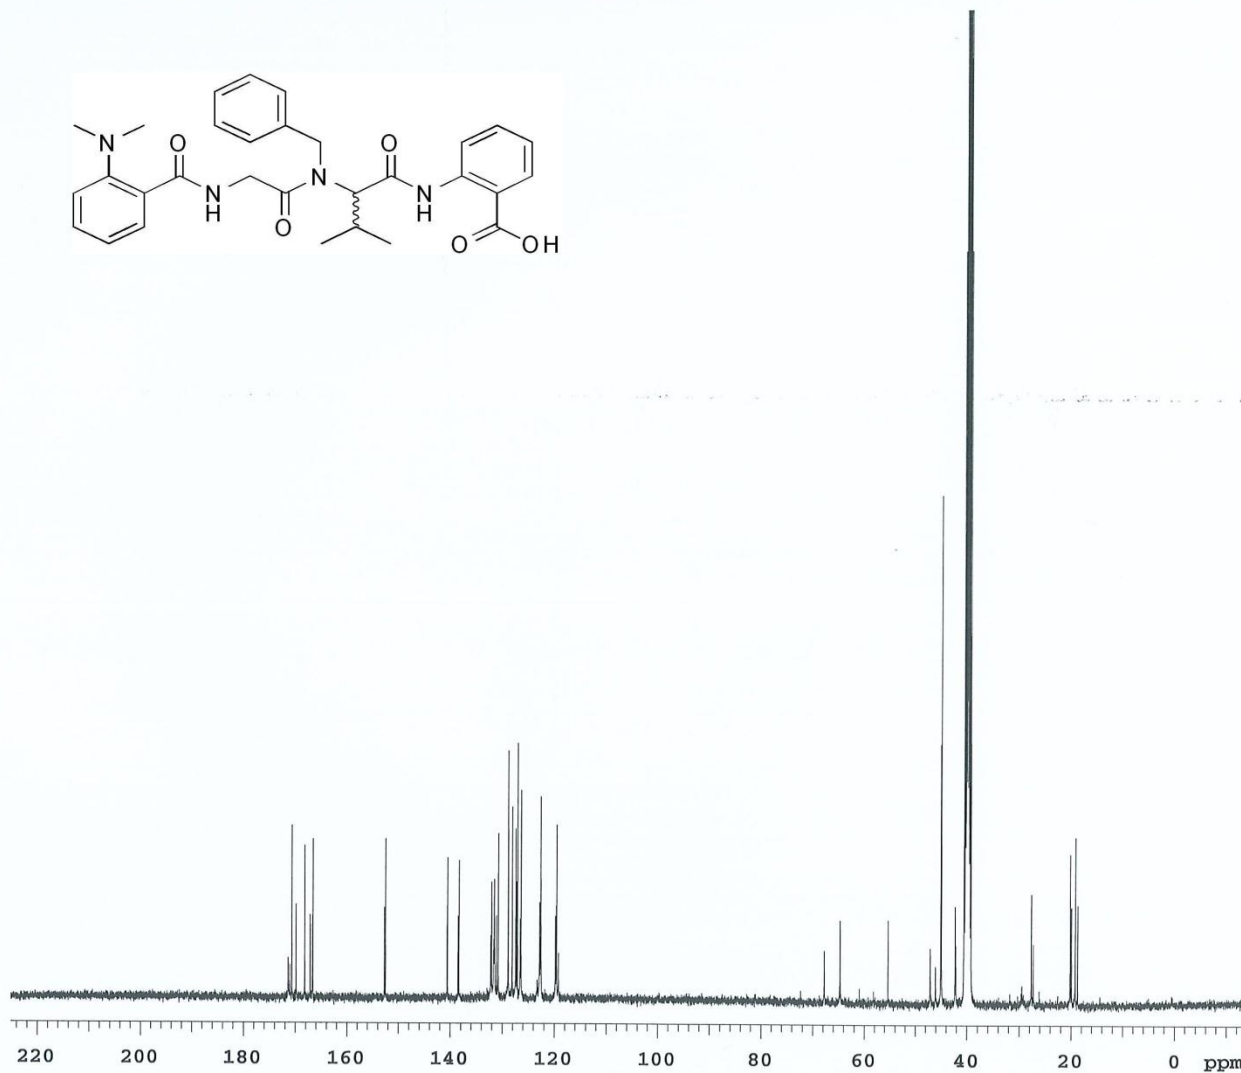

Figure S32:  $^{13}\text{C}$  NMR spectrum of compound 14c.

Mon Nov 28 11:28 2011

exp6 Proton

```
SAMPLE
date Nov 28 2011
samplename WNF173C
solvent dms0
file exp
ACQUISITION
instrum m400
probe_ autoX
seqfil s2pul
sfrq 399.920
tn H1
at 2.561
np 32768
sw 6398.0
bs 4
tpwr 59
pw 5.5
d1 0.439
d2 0
tof 368.7
nt 40
ct 40
alock n
gain not used
FLAGS
il n
in n
dp y
DEC. & VT
dn C13
dfrq 100.569
homo n
dpwr 45
dof 0
dm nnn
dmm c
dmf 17100
PROCESSING
lb 0.40
wtfile
proc ft
fn not used
DISPLAY
sp -235.0
wp 4914.8
vs 162
sc 0
wc 225
hzmm 21.84
is 553.45
rf1 1792.0
rfp 1000.2
th 2.1
ins 6.000
rp 29.1
lp -97.9
nm ph
```

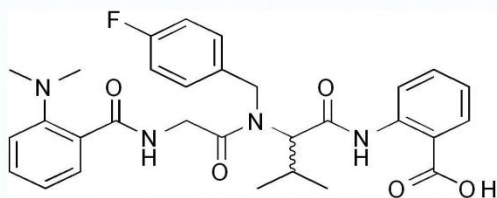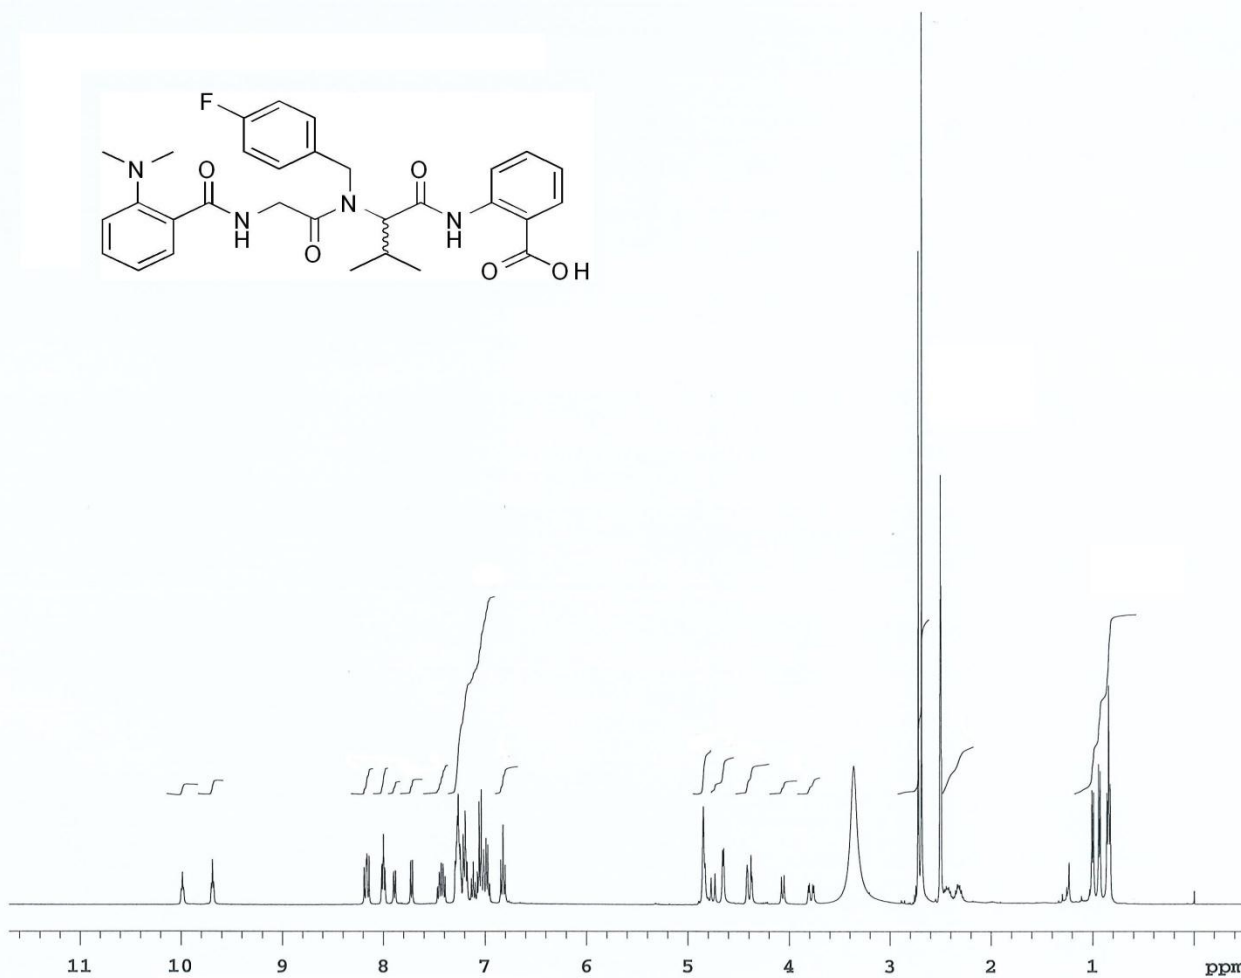

Figure S33:  $^1\text{H}$  NMR spectrum of compound 14d.

Mon Nov 28 20:04 2011  
duration: 14h 36min

exp6 Carbon

```
SAMPLE
date      Nov 28 2011
samplname WNF173C
solvent   dmsd
file      exp
ACQUISITION
instrum   m400
probe_    autoX
seqfil    s2pul
sfrq      100.570
tn         C13
at         1.357
np         65536
sw         24154.6
bs         16
tpwr       59
pw         5.7
d1         2.143
d2         0
tof        1020.6
nt         15000
ct         12944
alock     n
gain      not used
FLAGS
il         n
in         n
dp         y
DEC. & VT
dn         H1
dfrq       399.919
homo       n
dpwr       39
dof        0
dm         YYY
dmm        w
dmf        9300
pp         14.8
PROCESSING
lb         0.80
wtfile
proc       ft
fn         65536
wexp       procplot
DISPLAY
sp         -503.1
wp         20113.6
vs         3000
sc         0
wc         225
hzmh       89.39
rf1        5534.4
rfp        3972.1
th         68.3
rp         -136.6
lp         -217.6
nm         cdc ph
```

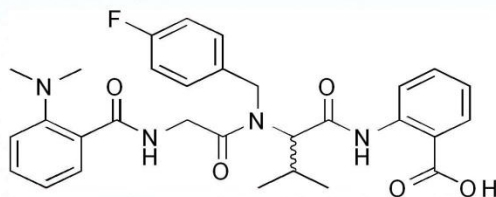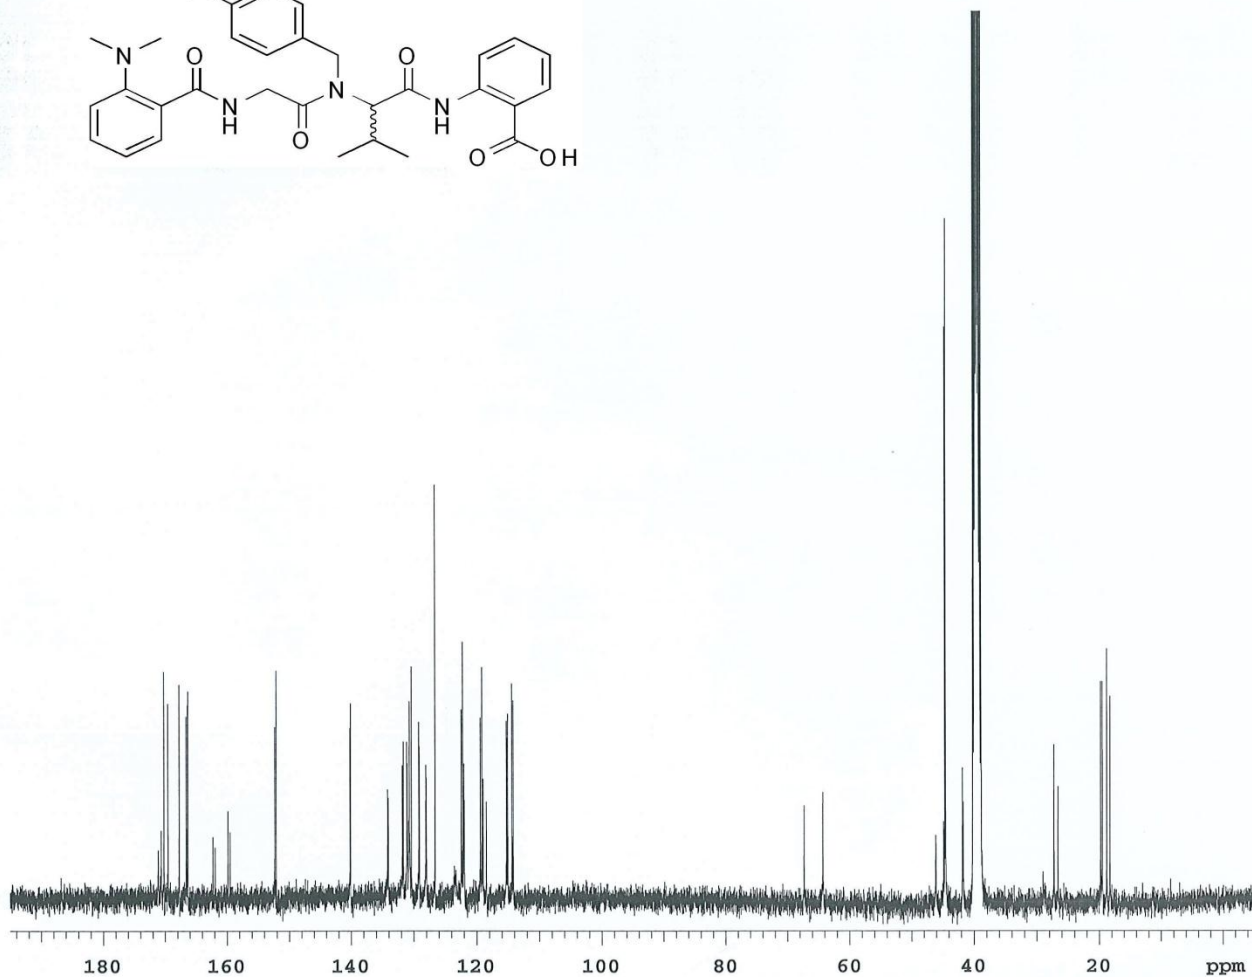

Figure S34:  $^{13}\text{C}$  NMR spectrum of compound 14d.

Sat Dec 3 19:22 2011

exp3 Proton

SAMPLE  
date Dec 3 2011  
samplename WNF173A  
solvent dmsc  
file exp

ACQUISITION  
instrum m400  
probe\_ autoX  
seqfil s2pul  
sfrq 399.920  
tn H1  
at 2.561  
np 32768  
sw 6398.0  
ba 4  
tpwr 59  
pw 5.5  
d1 0.439  
d2 0  
tof 368.7  
nt 40  
ct 20  
alock n  
gain not used

FLAGS  
il n  
in n  
dp y

DEC. & VT  
dn C13  
dfrq 100.569  
homo n  
dpwr 45  
dof 0  
dm nnn  
dmm c  
dmf 17100

PROCESSING  
lb 0.40  
wtfile  
proc ft  
fn not used

DISPLAY  
sp -137.0  
vp 4592.3  
vs 162  
sc 0  
wc 225  
hzm 20.41  
is 1440.59  
rfl 1792.1  
rfp 1000.2  
th 4.1  
ins 6.000  
rp 11.6  
lp -97.4  
nm ph

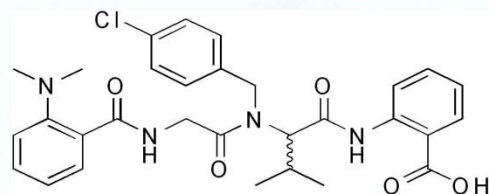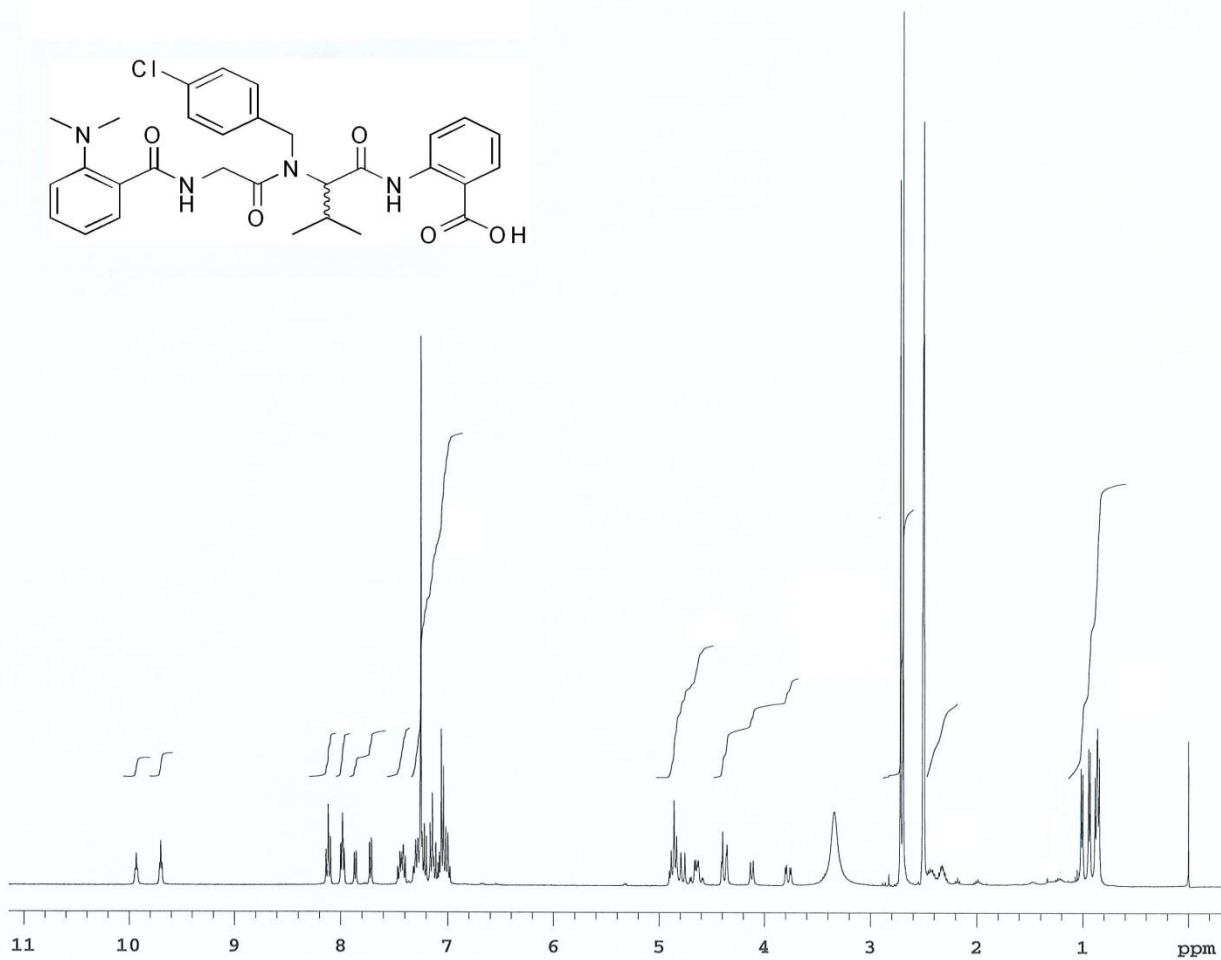

Figure S35: <sup>1</sup>H NMR spectrum of compound 14e.

Sat Dec 3 19:23 2011  
duration: 26h 17min

exp4 Carbon

```
SAMPLE
date Dec 3 2011
samplename WNF173A
solvent dmso
file exp
ACQUISITION
instrum m400
probe_ autoX
seqfil s2pul
sfrq 100.570
tn C13
at 1.357
np 65536
sw 24154.6
bs 16
tpwr 59
pw 2.143
d1 2.143
d2 0
tof 1020.6
nt 25000
ct 25000
alock n
gain not used
FLAGS
il n
in n
dp y
DEC. & VT
dn H1
dfrq 399.919
homo n
qpwr 39
dcf 0
dm yzy
dmm w
dmf 9300
pp 14.8
PROCESSING
lb 0.80
wtfile
proc ft
fn 65536
wexp procplot
DISPLAY
sp -1562.4
vp 24153.9
vs 1627
sc 0
wc 225
hnm 107.35
rfl 5535.2
rfd 3972.1
th 4.2
rp 139.7
lp -291.9
nm edc ph
```

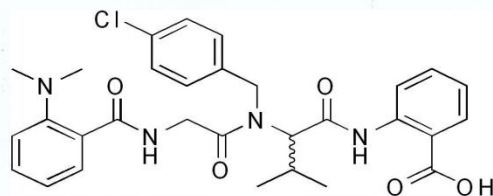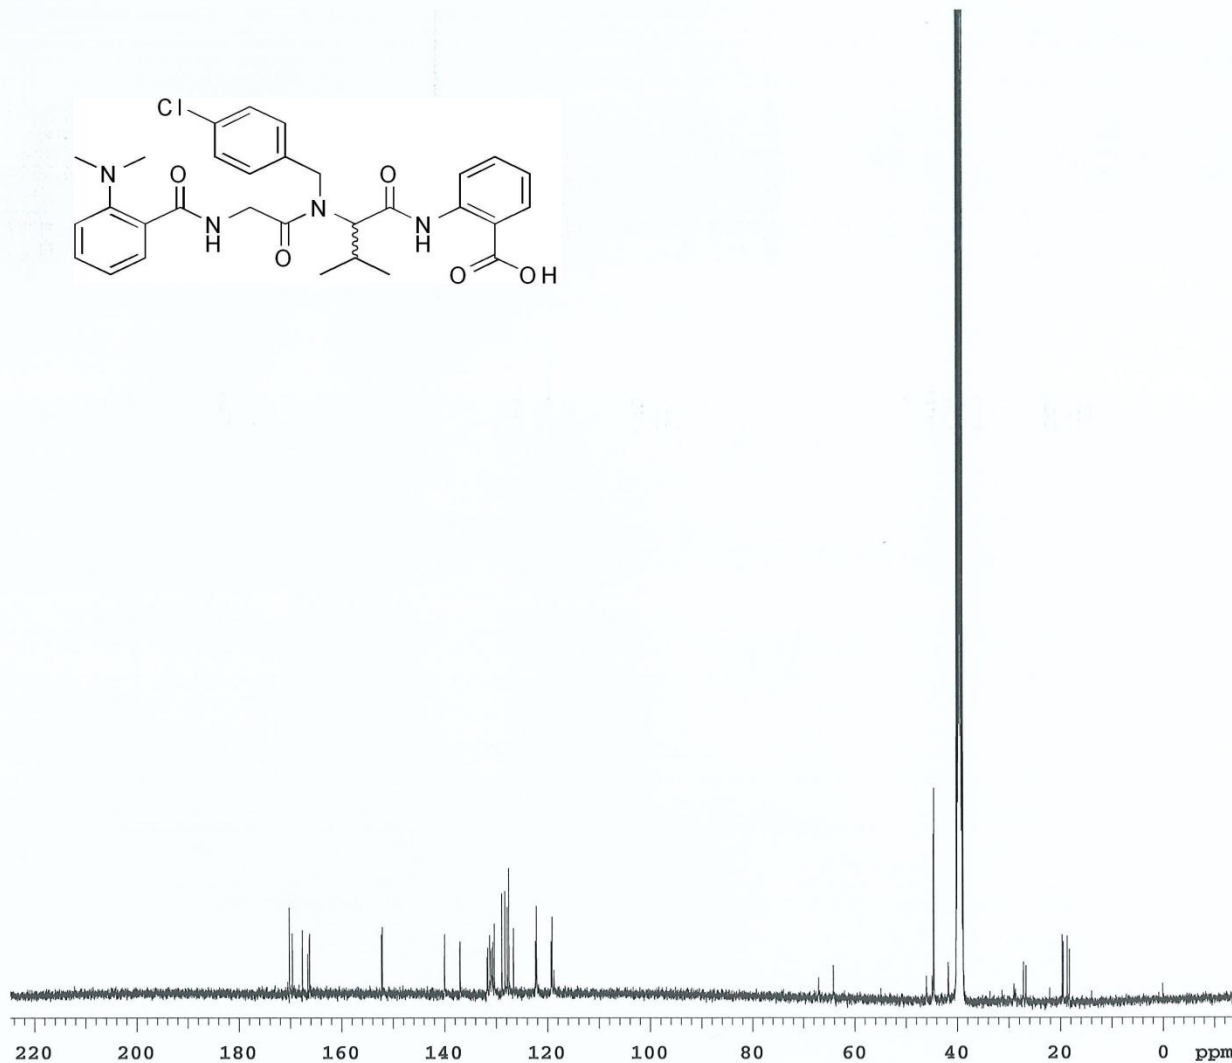

Figure S36:  $^{13}\text{C}$  NMR spectrum of compound 14e.

Wed Nov 30 18:22 2011

exp3 Proton

```
SAMPLE
date Nov 30 2011
samplename WNP173g
solvent dmsd
file exp
ACQUISITION
instrum m400
probe_ autoX
seqfil s2pul
sfrq 399.920
tn H1
at 2.561
np 32768
sw 6398.0
bs 4
tpwr 59
pw 5.5
dl 0.439
d2 0
tof 368.7
nt 40
ct 12
alock n
gain not used
FLAGS
il n
in n
dp Y
DEC. & VT
dn C13
dfrq 100.569
homo n
dpwr 45
dof 0
dm nnn
dmc c
dmf 17100
PROCESSING
lb 0.40
wtfile
proc ft
fn not used
DISPLAY
sp -63.3
wp 4457.6
vs 162
sc 0
wc 225
hzmm 19.81
is 324.08
rf1 789.2
rfp 0
th 5.8
ins 6.000
rp 1.1
lp -103.3
nm ph
```

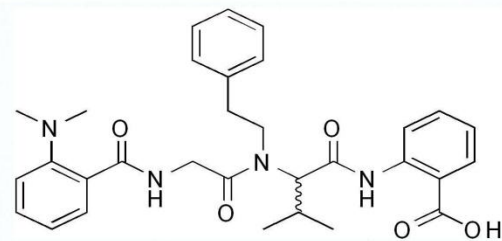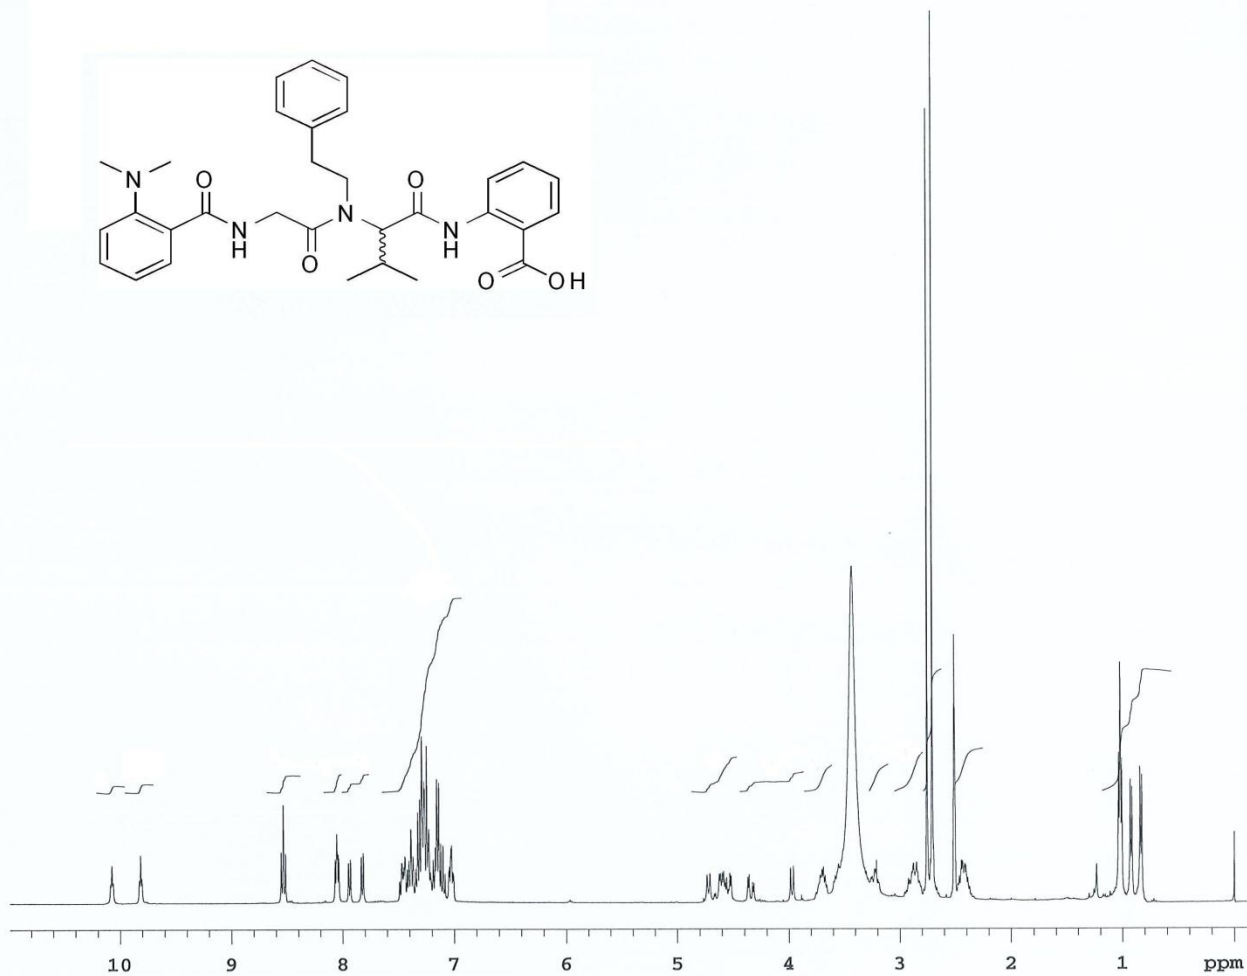

Figure S37:  $^1\text{H}$  NMR spectrum of compound **14f**.

Wed Nov 30 18:23 2011  
duration: 16h 46min

exp4 Carbon

SAMPLE  
date Nov 30 2011  
samplename WN173g  
solvent dmsd  
file exp

ACQUISITION  
instrum m400  
probe\_ autoX  
seqfil s2pul  
sfrq 100.570  
tn c13  
at 1.357  
np 65536  
sv 24154.6  
hs 16  
tpwr 59  
pw 5.7  
d1 2.143  
d2 0  
tof 1020.6  
nt 15000  
ct 15000  
alock n  
gain not used

FLAGS  
il n  
in n  
dp y

DEC. & VT

dn H1  
dfrq 399.919  
homo n  
dpwr 39  
dof 0  
dm YYY  
dnn w  
dmf 9300  
pp 14.8

PROCESSING

lb 0.80  
wtfile  
proc ft  
fn 65536

wexp procplot

DISPLAY

sp -454.1  
wp 22375.1  
vs 1079  
sc 0  
wc 225  
hzmm 99.45  
rf1 1518.6  
rfp 0  
th 4.2  
rp 164.7  
lp -242.9  
nm cdc ph

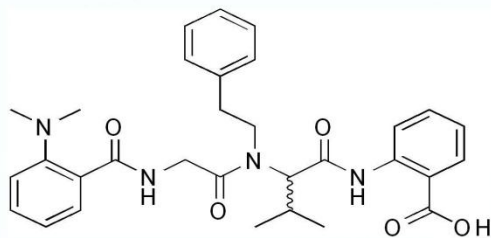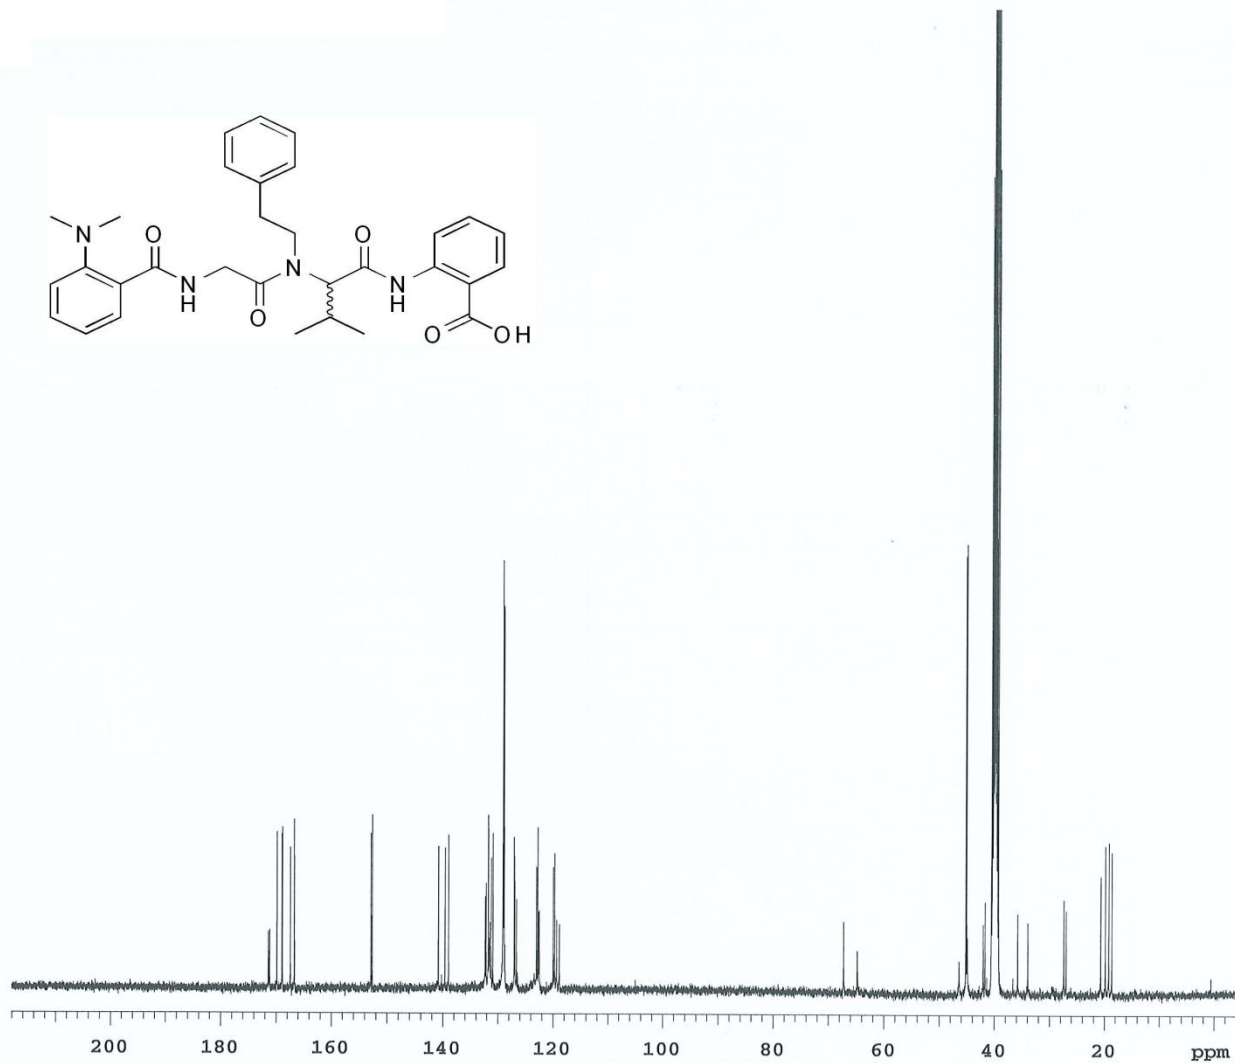

Figure S38:  $^{13}\text{C}$  NMR spectrum of compound 14f.

STA171/CDC13/1H  
Stark 20100322  
Mon Mar 22 14:29 2010  
duration: 0h 2min

exp1 Proton

SAMPLE  
date Mar 22 2010  
samplename STA171  
solvent cdcl3  
file exp  
ACQUISITION  
instrum m400  
probe\_ autoX  
seqfil s2pul  
sfrq 399.918  
tn H1  
at 2.561  
np 32768  
sw 6398.0  
bs 4  
tpwr 59  
pw 5.5  
d1 0.439  
d2 0  
tof 368.7  
nt 40  
ct 40  
alock n  
gain not used  
FLAGS  
il n  
in n  
dp y  
DEC. & VT  
dn C13  
dfrq 100.568  
homo n  
dpwr 45  
dof 0  
dm nmh  
dmm c  
dmf 17100  
PROCESSING  
lb 0.40  
wfile  
proc ft  
fn not used  
DISPLAY  
sp -200.3  
wp 3599.2  
vs 170  
sc 0  
wc 225  
hzmm 16.00  
is 700.00  
rfl 800.1  
rfp 0  
th 20.0  
ins 100.000  
rp 32.7  
lp -87.7  
nm cdc ph

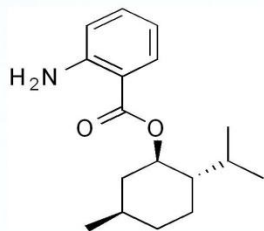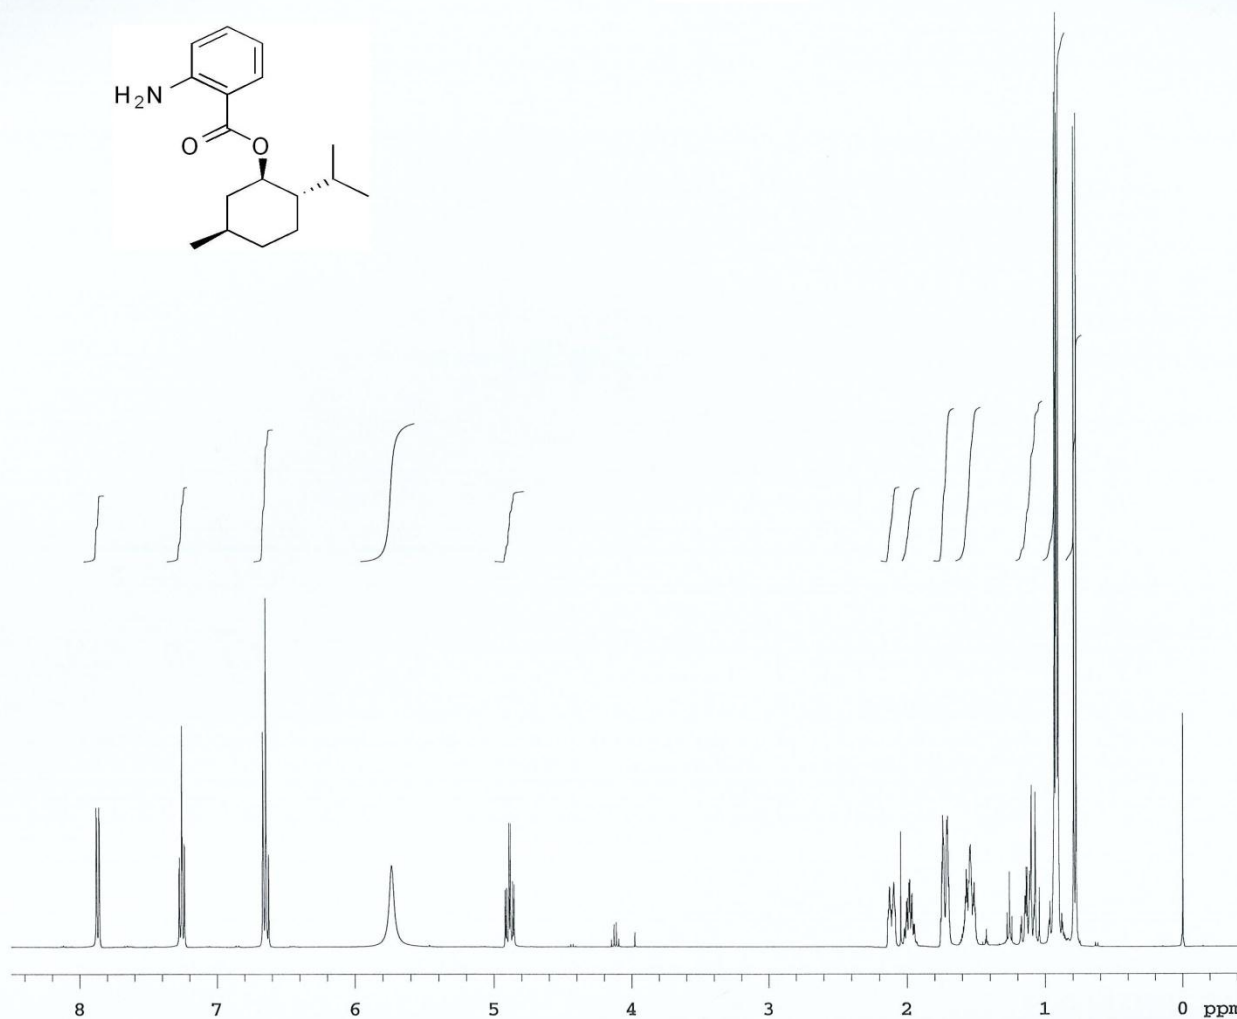

Figure S39: <sup>1</sup>H NMR spectrum of menthyl anthranilate.



STA171/CDC13/13C  
Stark 20100322  
Mon Mar 22 14:31 2010  
duration: 0h 28min

exp2 Carbon

```
SAMPLE
date Mar 22 2010
samplename STA171
solvent cdcl3
file exp
ACQUISITION
instrum m400
probe_ autoX
seqfil s2pul
sfrq 100.569
tn C13
at 1.357
np 65536
sw 24154.6
bs 16
tpwr 59
pw 5.5
d1 2.143
d2 0
tof 1020.6
nt 2048
ct 448
alock n
gain not used
FLAGS
il n
in n
dp y
DEC. & VT
dn H1
dfrq 399.917
homo n
dpr 39
dof 0
dm YYY
dmm w
dmf 9400
pp 14.8
PROCESSING
lb 0.80
wtfile
proc ft
fn 65536
wexp procpot
DISPLAY
sp -0.6
vp 18101.9
vs 170
sc 0
vc 225
hnm 80.45
rf1 9263.6
rfp 7743.0
th 13.6
rp 162.8
lp -253.6
nm cdc ph
```

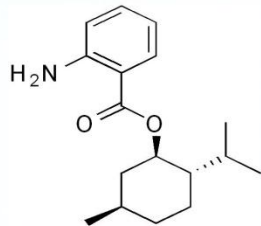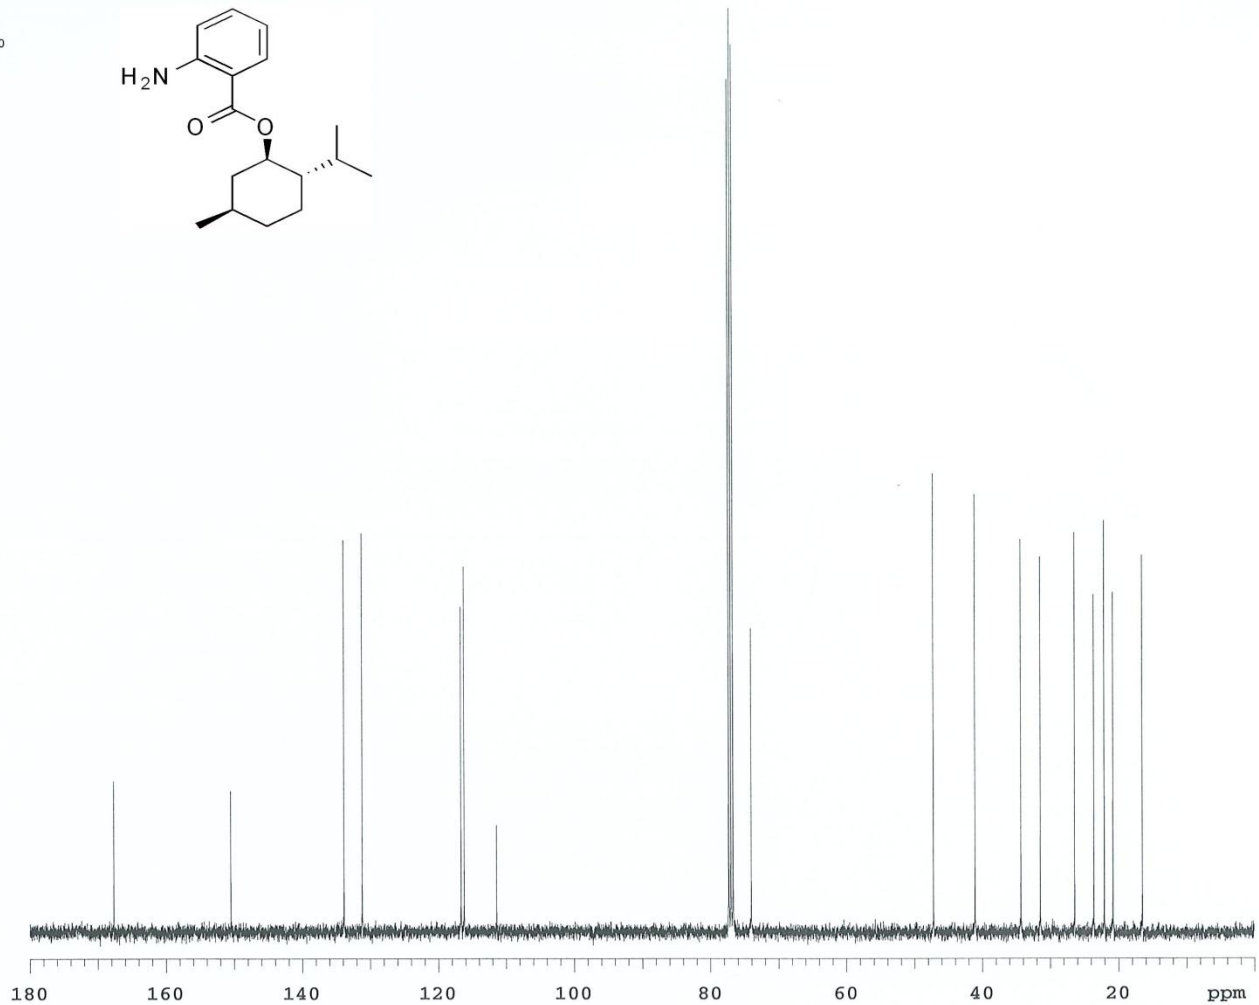

Figure S40:  $^{13}\text{C}$  NMR spectrum of menthyl anthranilate.

STA174/CDCl3/1H  
Stark 20100329  
Mon Mar 29 11:24 2010  
duration: 0h 2min

expl Proton

SAMPLE  
date Mar 29 2010  
samplename STA174  
solvent cdcl3  
file exp

ACQUISITION  
instrum m400  
probe\_ autoX  
seqfil s2pul  
sfrq 399.918  
tn H1  
at 2.561  
np 32768  
sw 6398.0  
bs 4  
tpwr 59  
pw 5.5  
d1 0.439  
d2 0  
tof 368.7  
nt 40  
ct 40  
alock n  
gain not used

FLAGS  
il n  
in n  
dp y

DEC. & VT  
dn C13  
dfrq 100.568  
homo n  
dpwr 45  
dof 0  
dm nnn  
dmm c  
dmf 17100

PROCESSING  
lb 0.40  
wtfile  
proc ft  
fn not used

DISPLAY  
sp -200.3  
wp 4798.9  
vs 170  
sc 0  
wc 225  
hzmm 21.33  
is 800.00  
rfl 797.4  
rfp 0  
th 2.9  
ins 100.000  
rp 30.9  
lp -97.2  
nm ph

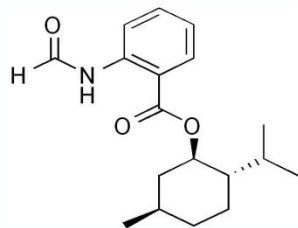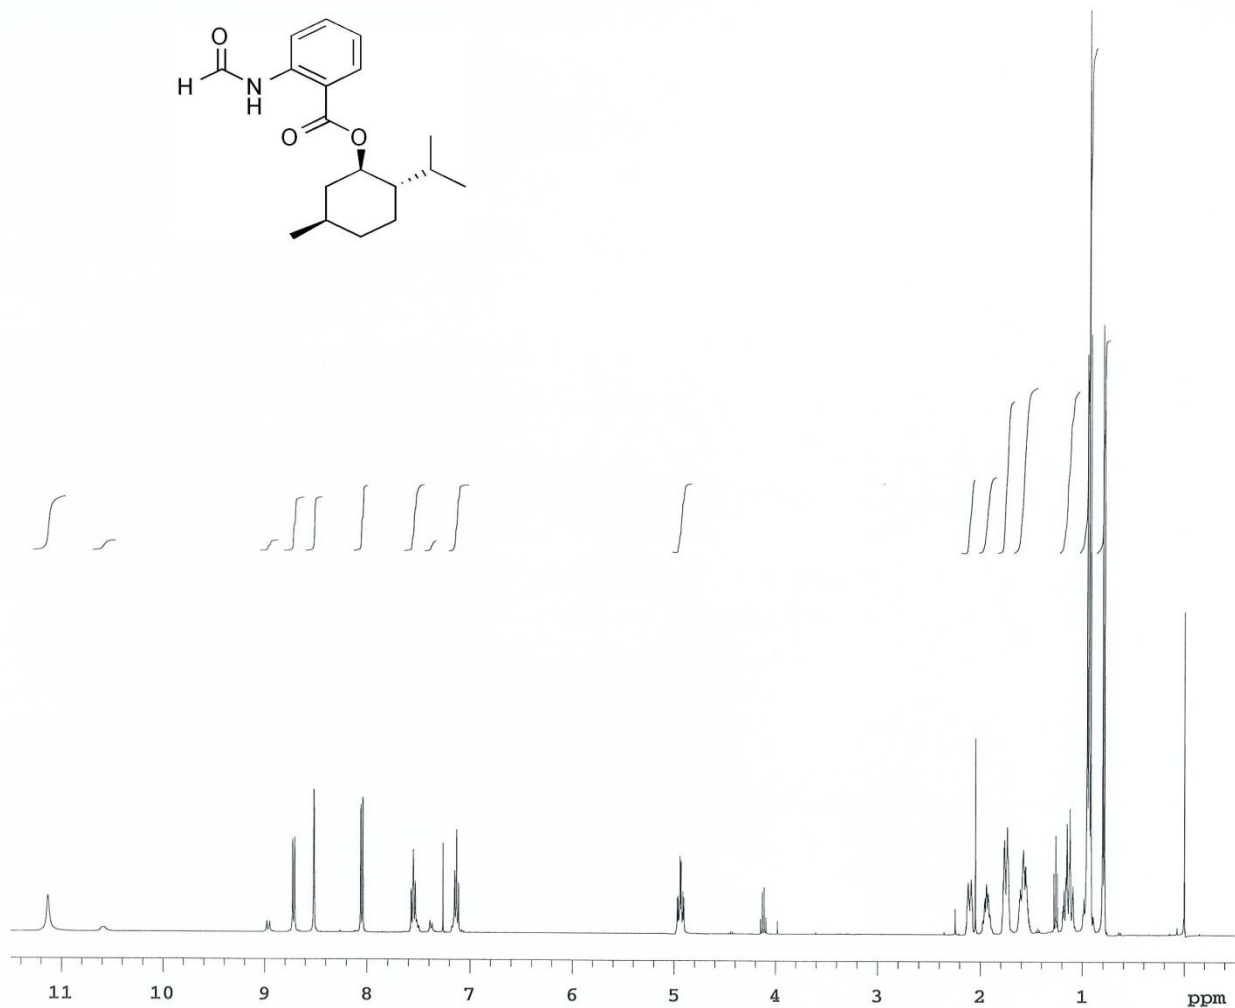

Figure S41: <sup>1</sup>H NMR spectrum of (-)-menthyl 2-formamidobenzoate.

STA174/CDC13/13C  
Stark 20100329  
Mon Mar 29 11:26 2010  
duration: 1h 29min

exp2 Carbon

```
SAMPLE
date   Mar 29 2010
samplename STA174
solvent cdc13
file    exp
ACQUISITION
instrum m400
probe_  autoX
seqfil  s2pul
sfrq    100.569
tn      C13
at      1.357
np      65536
sw      24154.6
bs      16
tpwr    59
pw      5.5
d1      2.143
d2      0
tof     1020.6
nt      2048
ct      1424
alock   n
gain    not used
FLAGS
il      n
in      n
dp      y
DEC. & VT
dn      H1
dfrq    399.917
homo    n
dpwr    39
dof     0
dm      yyy
dmm     w
dmf     9400
pp      14.8
PROCESSING
lb      0.80
wtfile
proc    ft
fn      65536
wexp    procplot
DISPLAY
sp      -503.4
wp      20113.6
vs      300
sc      0
wc      225
hzmm    89.39
rf1     9263.6
rfp     7743.0
th      13.6
rp      162.9
lp      -224.4
nm      cdc ph
```

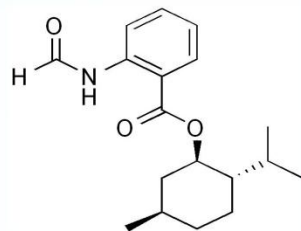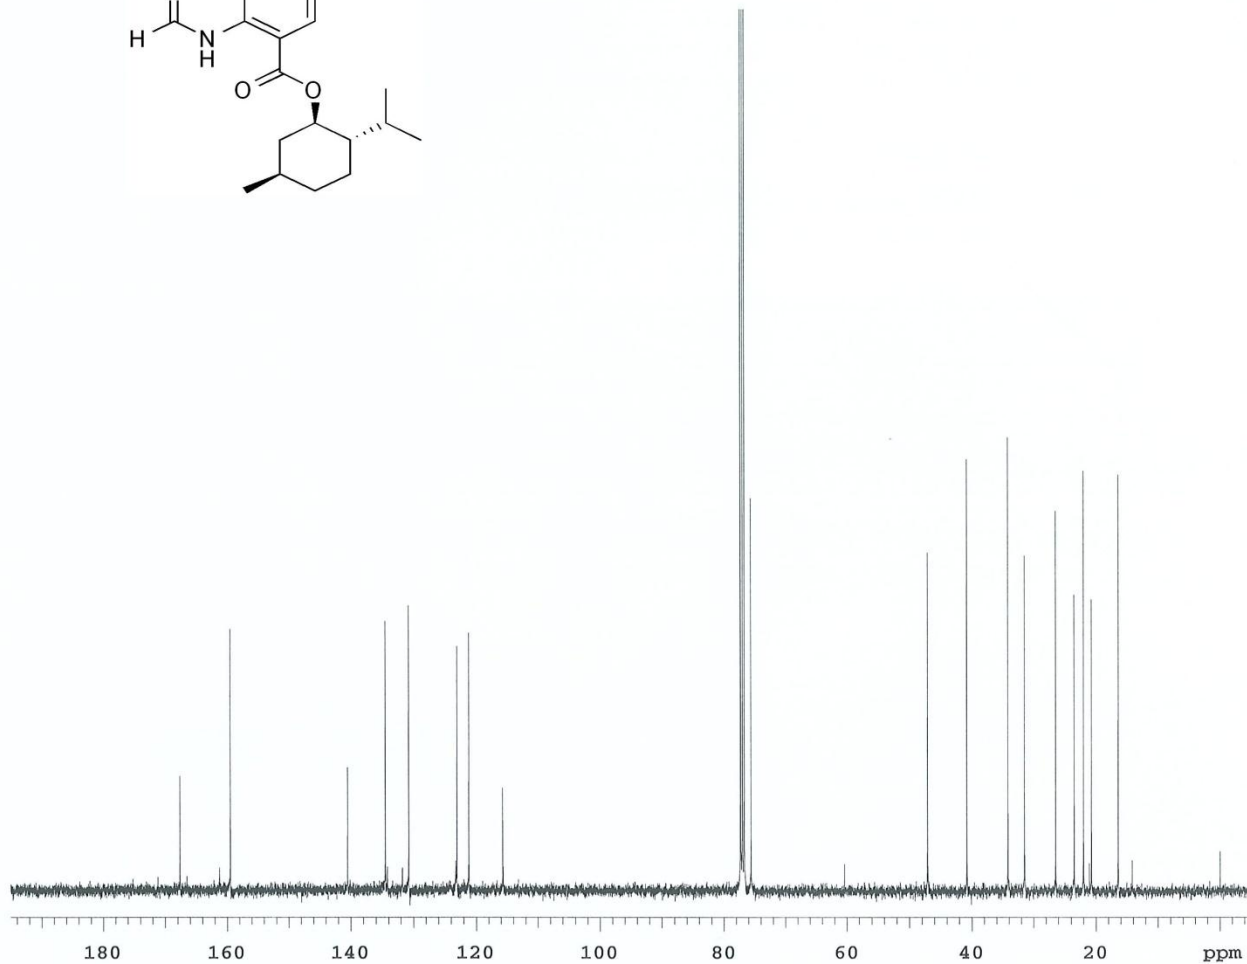

Figure S42:  $^{13}\text{C}$  NMR spectrum of (-)-menthyl 2-formamidobenzoate.

STA175/CDC13/1H  
Stark 20100331  
Wed Mar 31 16:17 2010  
duration: 0h 2min

exp1 Proton

SAMPLE  
date Mar 31 2010  
samplename STA175  
solvent cdc13  
file exp

ACQUISITION  
instrum m400  
probe\_ autoX  
seqfil s2pul  
sfrq 399.918  
tn H1  
at 2.561  
np 32768  
sw 6398.0  
bs 4  
tpwr 59  
pw 5.5  
d1 0.439  
d2 0  
tof 368.7  
nt 40  
ct 40  
alock n  
gain not used

FLAGS  
il n  
in n  
dp y

DEC. & VT  
dn C13  
dfrq 100.568  
homo n  
dprc 45  
dof 0  
da nnn  
dum c  
dmf 17100

PROCESSING  
lb 0.40  
wtfile  
proc ft  
fn not used

DISPLAY  
sp -200.3  
wp 3999.1  
vs 170  
sc 0  
wc 225  
hzmm 17.77  
is 600.00  
rfl 795.4  
rfp 0  
th 2.1  
ins 100.000  
rp 34.6  
lp -92.6  
nm ph

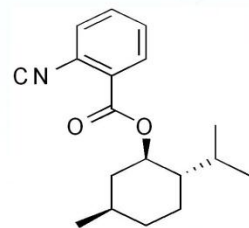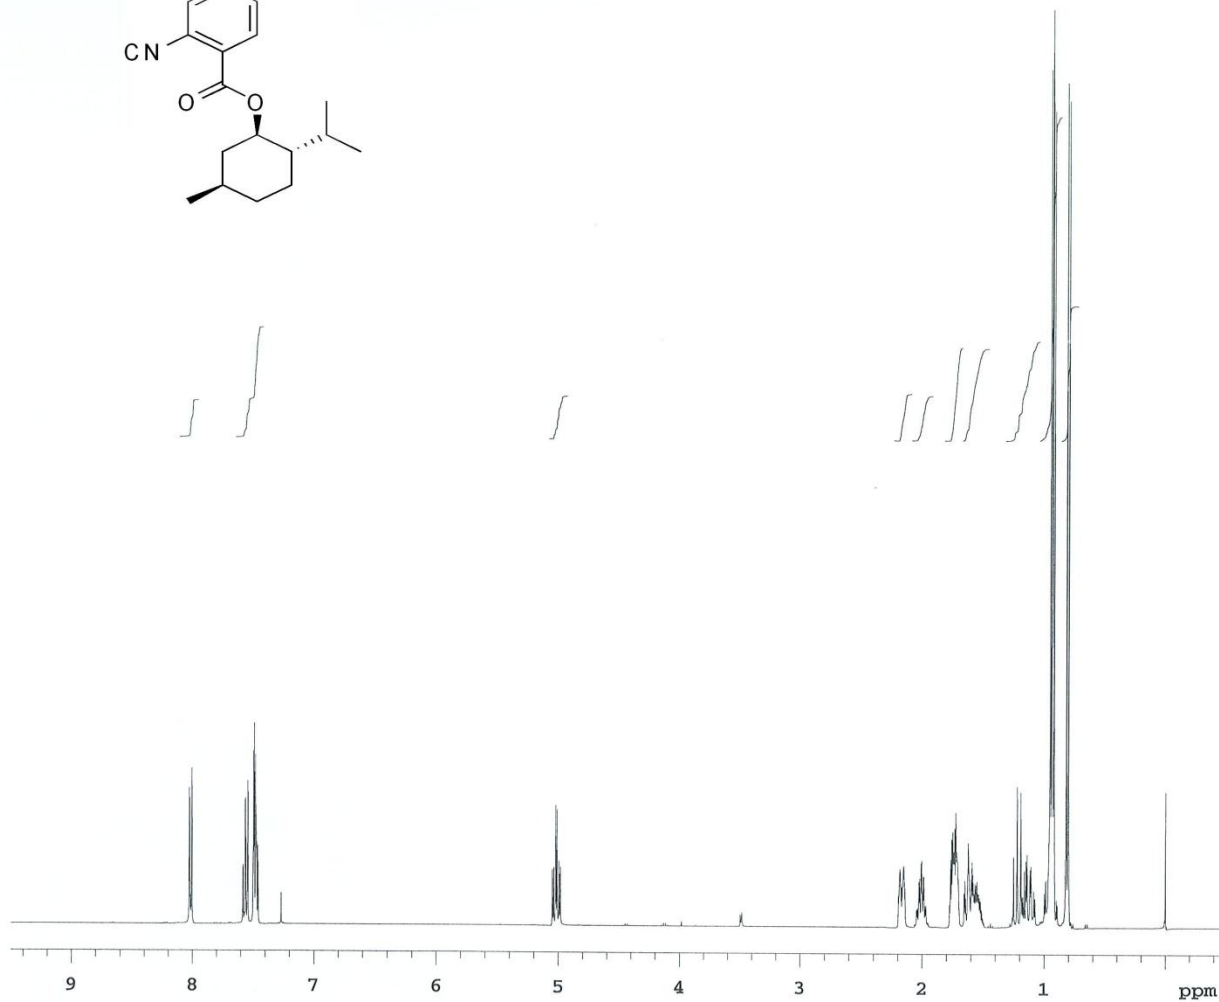

Figure S43: <sup>1</sup>H NMR spectrum of compound 4b.

STA175/CDC13/13C  
Stark 20100331  
Wed Mar 31 16:19 2010  
duration: 0h 25min

exp2 Carbon

SAMPLE  
date Mar 31 2010  
samplename STA175  
solvent cdcl3  
file exp

ACQUISITION  
instrum m400  
probe\_ autoX  
seqfil s2pul  
sfrq 100.569  
cn C13  
at 1.357  
np 65536  
sw 24154.6  
bs 16  
tpwr 59  
pw 5.5  
d1 2.143  
d2 0  
tof 1020.6  
nt 2048  
ct 400  
alock n  
gain not used

FLAGS  
il n  
in n  
dp y  
DEC. & VT  
dn H1  
dfrq 399.917  
homo n  
dpwr 39  
dof 0  
dm YYY  
dms w  
dmf 9400  
pp 14.8

PROCESSING  
lb 0.80  
wtfile  
proc ft  
fn 65536

wexp procplot  
DISPLAY  
sp -503.4  
vp 20113.6  
vs 170  
sc 0  
wc 225  
hzmm 89.39  
rfl 9264.4  
rfp 7743.0  
th 4.2  
rp 176.0  
lp -273.5  
nm cdc ph

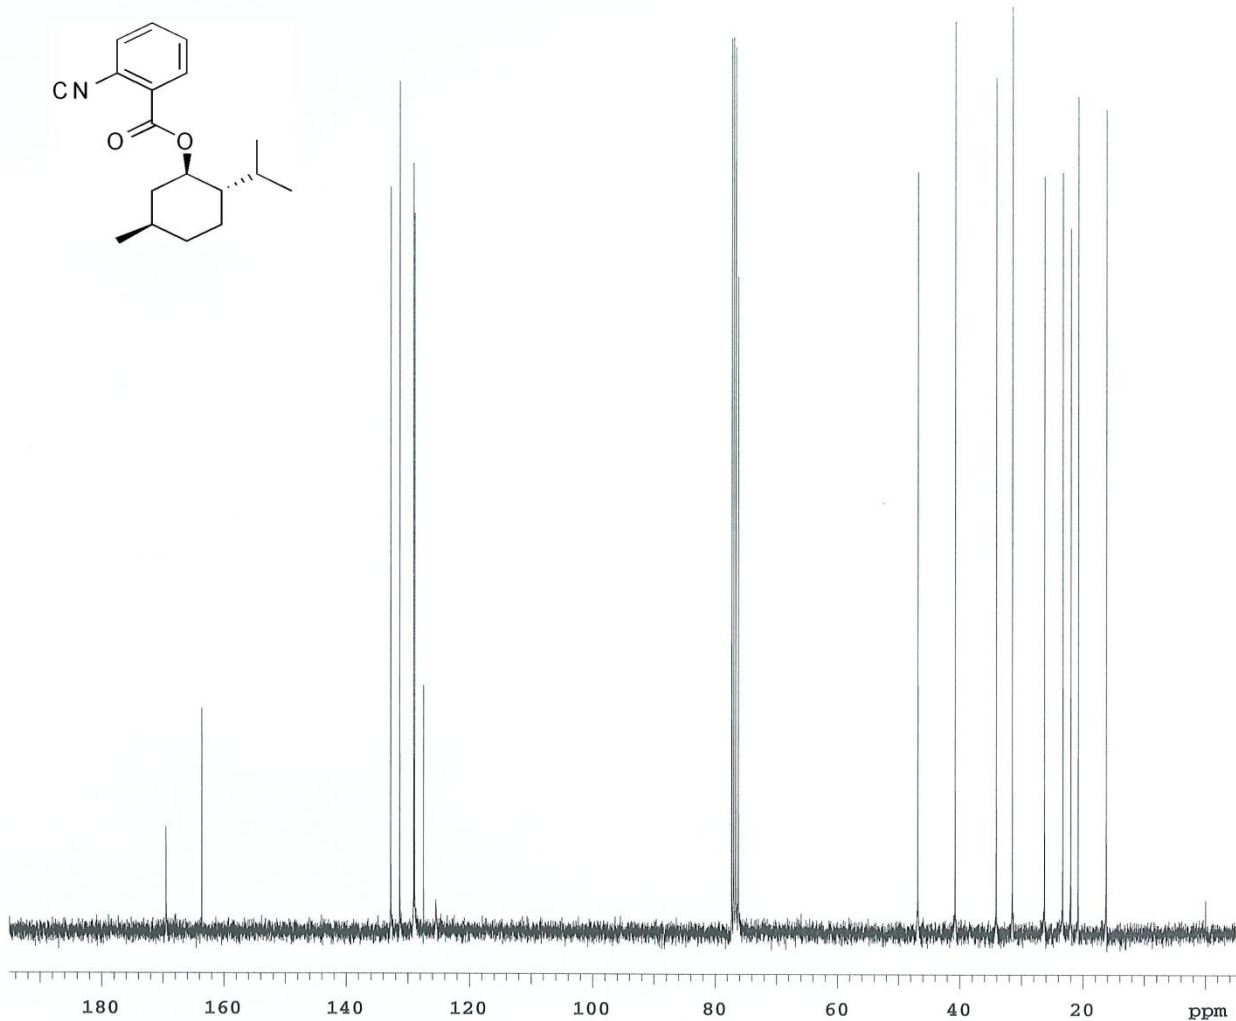

Figure S44: <sup>13</sup>C NMR spectrum of compound 4b.

Wed Apr 7 15:21 2010  
duration: 0h 2min

expl Proton

SAMPLE  
date Apr 7 2010  
samplename WNF069\_B  
solvent cdcl3  
file exp

ACQUISITION  
instrum m400  
probe autoX  
seqfil s2pul  
sfrq 399.918  
tn H1  
at 2.561  
np 32768  
sw 6398.0  
bs 4  
tpwr 59  
pw 5.5  
d1 0.439  
d2 0  
tof 368.7  
nt 40  
ct 40  
alock n  
gain not used

FLAGS  
il n  
in n  
dp y

DEC. & VT  
dn C13  
dfrq 100.566  
homo n  
dpwr 45  
dof 0  
dm nnn  
dnn c  
dmf 17100

PROCESSING  
lb 0.40  
wtfile  
proc ft  
fn not used

DISPLAY  
sp -200.3  
wp 4998.8  
vs 500  
sc 0  
wc 225  
hzmm 22.22  
is 750.00  
rf1 794.3  
rfp 0  
th 4.1  
ine 100.000  
rp 37.8  
lp -88.0  
nm ph

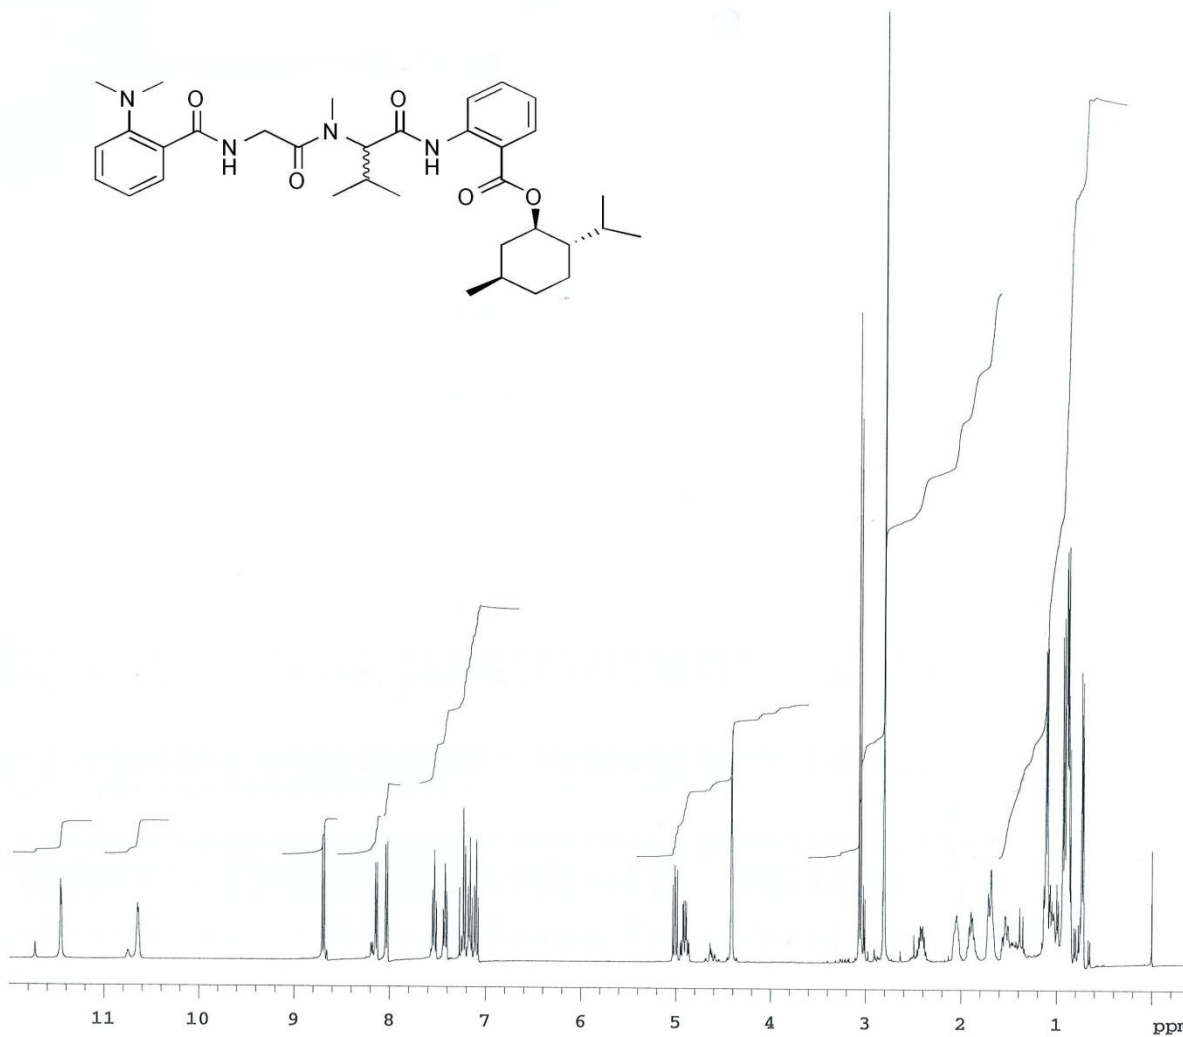

Figure S45: <sup>1</sup>H NMR spectrum of compound 13g.

Wed Apr 7 15:53 2010  
duration: 1h 35min

exp2 Carbon

```
SAMPLE
date Apr 7 2010
samplename WNF069_B
solvent cdcl3
file exp
ACQUISITION
instrum m400
probe_ autoX
seqfil s2pul
sfrq 100.569
tn C13
at 1.357
np 65536
sw 24154.6
bs 16
tpwr 59
pw 5.5
d1 2.143
d2 0
tof 1020.6
nt 2048
ct 560
alock n
gain not used
FLAGS
il n
in n
dp y
DEC. & VT
dn H1
dfrq 399.917
homo n
dpwr 39
dof 0
dm YYY
dnm w
dmf 9400
pp 14.8
PROCESSING
lb 0.80
wtfile
proc ft
fn 65536
wexp procplot
DISPLAY
sp 1005.6
sp 16593.7
vs 143
sc 0
wc 225
hzmm 73.75
rfl 9265.8
rfp 7743.0
th 5.8
rp 170.8
lp -243.8
nm cdc ph
```

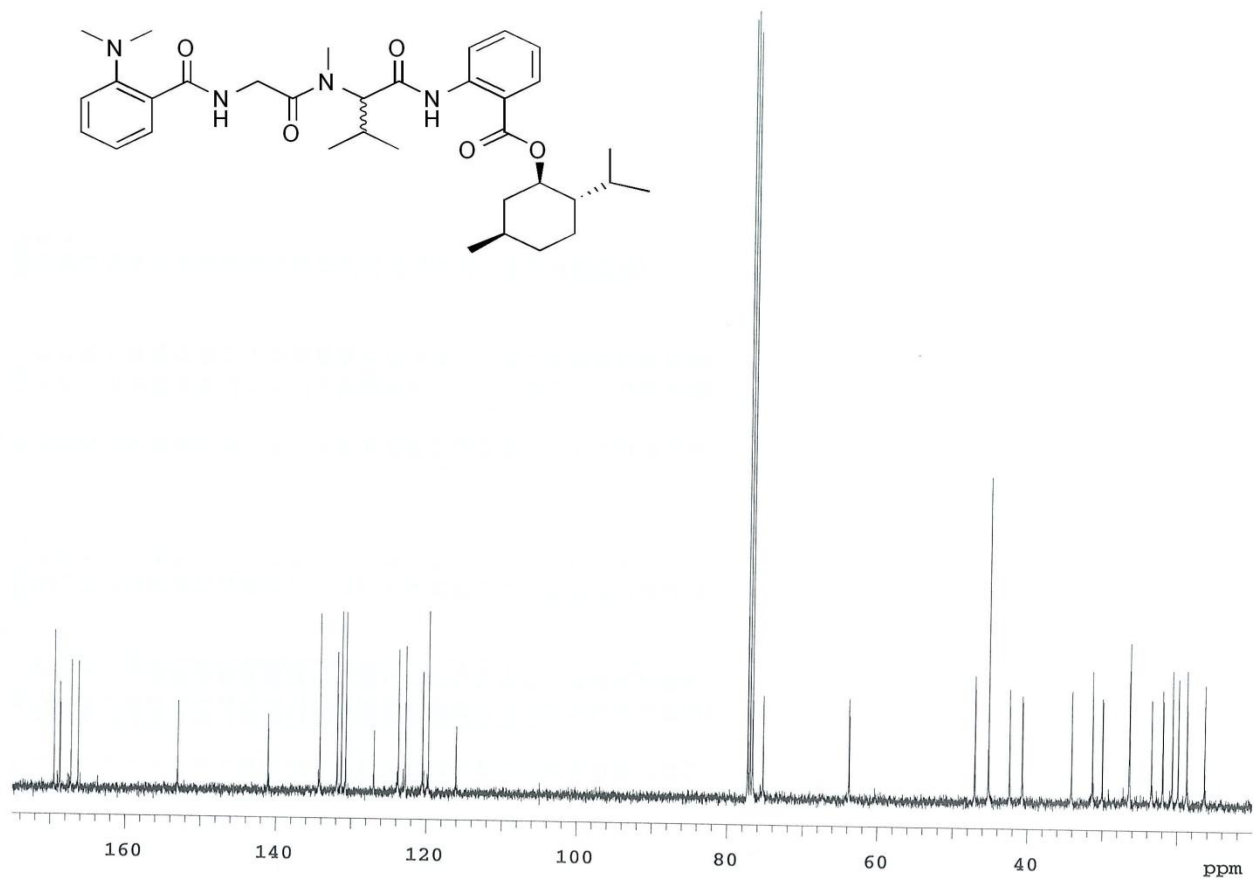

Figure S46: <sup>13</sup>C NMR spectrum of compound 13g.
